# Supplementary material for: Resolving glycogen and related enzymes reveals correlates of Lactobacillus crispatus dominance in a cohort of young African women
Source: Research Square preprint supplement (doi:10.21203/rs.3.rs-1679828/v1), 2022-05-25
Supplement: Supplementary file 1 [file 0395f91881f42aa5d622b8fd.xlsx]

## Sheet: Table S14
Table S14. Kenyan Girls Health Study metagenomic assemblies
Metagenome ID	Sample Number	Total Raw Reads	Total Number of Filtered Reads*	Number of Contigs	Largest Contig	Total Length	GC (%)	N50
THIKA_1	1	24274159	1321174	1008	256891	5486803	35.83	36331
THIKA_2	2	25901762	1839808	658	85594	2667697	37.88	19976
THIKA_3	3	22379156	586735	387	667286	2594969	57.65	179611
THIKA_4	4	21028798	1103458	673	172860	5588098	39.8	40091
THIKA_5	5	37418366	4223725	2022	252122	13113125	38.33	37185
THIKA_6	6	36043543	802010	1289	380982	3207919	39.43	76361
THIKA_7	7	22674378	1954119	537	461811	3875896	35.58	37764
THIKA_8	8	21419568	3773184	1266	112136	3628242	39	10064
THIKA_9	9	23350435	1116676	499	739693	3874789	38.76	127881
THIKA_10	10	24009704	3718991	1622	45290	3104949	38.19	7165
THIKA_11	11	25533930	6042513	1090	78506	4052106	38.61	8591
THIKA_12	12	22488914	809684	1167	399006	5129737	47.25	113430
THIKA_13	13	26725635	3208499	2469	49060	4083834	38.47	3837
THIKA_14	14	31072673	4438500	1995	78082	3867142	38.62	5530
THIKA_15	15	24979737	3701058	2236	47722	5489217	37.89	5649
THIKA_16	16	25040217	391654	2239	285670	3714635	37.74	2427
THIKA_17	17	24564462	1169583	2452	828236	3087228	36.81	1233
Footnotes:
*Number of reads after quality filtering and human contamination removal; clean read count.

## Sheet: Table S15
Table S15. Kenyan Girls Health Study MAGs
MAG ID	GTDB-tk Classification	Taxonomic Level	Sample ID	Bin ID	Total Number of Contigs	Completeness	Contamination	GC (%)	N50	Total Length	GTDB-tk Lineage	FastANI Reference	FastANI Reference Radius	FastANI Taxonomy	FastANI ANI	FastANI AF	Closest Placement Reference	Closest Placement Radius	Closest Placement Taxonomy	Closest Placement ANI	Closest Placement AF	pplacer Taxonomy	Classification Method	Note	Other Related References ( Genome ID, Species Name, Radius, ANI, AF )	MSA Percent	Translation Table	Red Value	Warnings
THIKA_1_bin.1	Lactobacillus iners	Species	1	1	4	53.44	0	32.1	148933	525800	d__Bacteria;p__Firmicutes;c__Bacilli;o__Lactobacillales;f__Lactobacillaceae;g__Lactobacillus;s__Lactobacillus iners	GCF_000160875.1	95	d__Bacteria;p__Firmicutes;c__Bacilli;o__Lactobacillales;f__Lactobacillaceae;g__Lactobacillus;s__Lactobacillus iners	98.58	0.92	GCF_000160875.1	95	d__Bacteria;p__Firmicutes;c__Bacilli;o__Lactobacillales;f__Lactobacillaceae;g__Lactobacillus;s__Lactobacillus iners	98.58	0.92	d__Bacteria;p__Firmicutes;c__Bacilli;o__Lactobacillales;f__Lactobacillaceae;g__Lactobacillus;s__	taxonomic classification defined by topology and ANI	topological placement and ANI have congruent species assignments	GCF_013346935.1, s__Lactobacillus melliventris, 95.0, 78.16, 0.07; GCF_003584685.1, s__Lactobacillus paragasseri, 95.0, 78.09, 0.22; GCF_000014425.1, s__Lactobacillus gasseri, 95.0, 77.55, 0.22; GCF_000159355.1, s__Lactobacillus johnsonii, 95.0, 77.25, 0.23; GCF_000296835.1, s__Lactobacillus hominis, 95.0, 77.24, 0.25; GCF_000178475.1, s__Lactobacillus amylolyticus, 95.0, 77.16, 0.11; GCF_0029169…	46.91	11	N/A	N/A
THIKA_1_bin.2	Lactobacillus	Genus	1	2	47	55.17	0	34.9	33579	976697	d__Bacteria;p__Firmicutes;c__Bacilli;o__Lactobacillales;f__Lactobacillaceae;g__Lactobacillus;s__	N/A	N/A	N/A	N/A	N/A	GCF_002088015.1	95	d__Bacteria;p__Firmicutes;c__Bacilli;o__Lactobacillales;f__Lactobacillaceae;g__Lactobacillus;s__Lactobacillus crispatus	96.22	0.57	d__Bacteria;p__Firmicutes;c__Bacilli;o__Lactobacillales;f__Lactobacillaceae;g__Lactobacillus;s__	taxonomic classification defined by topology and ANI	N/A	GCF_000160875.1, s__Lactobacillus iners, 95.0, 95.78, 0.38; GCF_000615285.1, s__Lactobacillus kitasatonis, 95.0, 80.61, 0.39; GCF_001591845.1, s__Lactobacillus acidophilus, 95.0, 80.54, 0.37; GCF_002706375.1, s__Lactobacillus amylovorus, 95.0, 80.4, 0.36; GCF_900103655.1, s__Lactobacillus kefiranofaciens, 95.0, 80.34, 0.34; GCF_000160855.1, s__Lactobacillus helveticus, 95.0, 80.32, 0.35; GCF_0006…	46.56	11	0.998848	N/A
THIKA_1_bin.3	Lactobacillus crispatus	Species	1	3	139	60.88	0	37.5	15680	1314535	d__Bacteria;p__Firmicutes;c__Bacilli;o__Lactobacillales;f__Lactobacillaceae;g__Lactobacillus;s__Lactobacillus crispatus	GCF_002088015.1	95	d__Bacteria;p__Firmicutes;c__Bacilli;o__Lactobacillales;f__Lactobacillaceae;g__Lactobacillus;s__Lactobacillus crispatus	97.38	0.86	GCF_002088015.1	95	d__Bacteria;p__Firmicutes;c__Bacilli;o__Lactobacillales;f__Lactobacillaceae;g__Lactobacillus;s__Lactobacillus crispatus	97.38	0.86	d__Bacteria;p__Firmicutes;c__Bacilli;o__Lactobacillales;f__Lactobacillaceae;g__Lactobacillus;s__	taxonomic classification defined by topology and ANI	topological placement and ANI have congruent species assignments	GCF_000615285.1, s__Lactobacillus kitasatonis, 95.0, 83.78, 0.65; GCF_000614735.1, s__Lactobacillus gallinarum, 95.0, 83.54, 0.65; GCF_002706375.1, s__Lactobacillus amylovorus, 95.0, 83.34, 0.68; GCF_000160855.1, s__Lactobacillus helveticus, 95.0, 82.64, 0.63; GCF_001436305.1, s__Lactobacillus ultunensis, 95.0, 82.47, 0.64; GCF_900103655.1, s__Lactobacillus kefiranofaciens, 95.0, 82.3, 0.63; GCF_…	64.54	11	N/A	N/A
THIKA_1_bin.4	Lactobacillus mulieris	Species	1	4	52	98.57	0	34	51729	1647279	d__Bacteria;p__Firmicutes;c__Bacilli;o__Lactobacillales;f__Lactobacillaceae;g__Lactobacillus;s__Lactobacillus mulieris	GCF_007095465.1	95	d__Bacteria;p__Firmicutes;c__Bacilli;o__Lactobacillales;f__Lactobacillaceae;g__Lactobacillus;s__Lactobacillus mulieris	99.72	0.88	GCF_007095465.1	95	d__Bacteria;p__Firmicutes;c__Bacilli;o__Lactobacillales;f__Lactobacillaceae;g__Lactobacillus;s__Lactobacillus mulieris	99.72	0.88	d__Bacteria;p__Firmicutes;c__Bacilli;o__Lactobacillales;f__Lactobacillaceae;g__Lactobacillus;s__	taxonomic classification defined by topology and ANI	topological placement and ANI have congruent species assignments	GCF_001436455.1, s__Lactobacillus jensenii, 95.0, 88.55, 0.79; GCF_000425905.1, s__Lactobacillus psittaci, 95.0, 83.18, 0.64; GCF_000615445.1, s__Lactobacillus hamsteri, 95.0, 78.86, 0.27; GCF_001434335.1, s__Lactobacillus kalixensis, 95.0, 78.86, 0.22; GCF_000614735.1, s__Lactobacillus gallinarum, 95.0, 78.69, 0.23; GCF_003423665.1, s__Lactobacillus rodentium, 95.0, 78.64, 0.22; GCF_000160855.1,…	94.98	11	N/A	N/A
THIKA_2_bin.1	Lactobacillus crispatus	Species	2	1	162	99.02	0.278	36.6	22144	2269709	d__Bacteria;p__Firmicutes;c__Bacilli;o__Lactobacillales;f__Lactobacillaceae;g__Lactobacillus;s__Lactobacillus crispatus	GCF_002088015.1	95	d__Bacteria;p__Firmicutes;c__Bacilli;o__Lactobacillales;f__Lactobacillaceae;g__Lactobacillus;s__Lactobacillus crispatus	97.78	0.77	GCF_002088015.1	95	d__Bacteria;p__Firmicutes;c__Bacilli;o__Lactobacillales;f__Lactobacillaceae;g__Lactobacillus;s__Lactobacillus crispatus	97.78	0.77	d__Bacteria;p__Firmicutes;c__Bacilli;o__Lactobacillales;f__Lactobacillaceae;g__Lactobacillus;s__	taxonomic classification defined by topology and ANI	topological placement and ANI have congruent species assignments	GCF_000615285.1, s__Lactobacillus kitasatonis, 95.0, 82.97, 0.54; GCF_002706375.1, s__Lactobacillus amylovorus, 95.0, 82.78, 0.54; GCF_000614735.1, s__Lactobacillus gallinarum, 95.0, 82.63, 0.57; GCF_000160855.1, s__Lactobacillus helveticus, 95.0, 82.38, 0.5; GCF_001591845.1, s__Lactobacillus acidophilus, 95.0, 81.9, 0.52; GCF_900103655.1, s__Lactobacillus kefiranofaciens, 95.0, 81.87, 0.5; GCF_0…	91.68	11	N/A	N/A
THIKA_3_bin.1	Bifidobacterium breve	Species	3	1	18	100	0	58.6	210673	2337937	d__Bacteria;p__Actinobacteriota;c__Actinomycetia;o__Actinomycetales;f__Bifidobacteriaceae;g__Bifidobacterium;s__Bifidobacterium breve	GCF_001025175.1	95	d__Bacteria;p__Actinobacteriota;c__Actinomycetia;o__Actinomycetales;f__Bifidobacteriaceae;g__Bifidobacterium;s__Bifidobacterium breve	98.59	0.88	GCF_001025175.1	95	d__Bacteria;p__Actinobacteriota;c__Actinomycetia;o__Actinomycetales;f__Bifidobacteriaceae;g__Bifidobacterium;s__Bifidobacterium breve	98.59	0.88	d__Bacteria;p__Actinobacteriota;c__Actinomycetia;o__Actinomycetales;f__Bifidobacteriaceae;g__Bifidobacterium;s__	taxonomic classification defined by topology and ANI	topological placement and ANI have congruent species assignments	GCF_000269965.1, s__Bifidobacterium infantis, 95.0, 87.5, 0.72; GCF_000196555.1, s__Bifidobacterium longum, 95.0, 86.77, 0.67; GCF_003129905.1, s__Bifidobacterium callitrichidarum, 95.0, 83.07, 0.61; GCF_002259745.1, s__Bifidobacterium myosotis, 95.0, 82.73, 0.59; GCF_000741695.1, s__Bifidobacterium reuteri, 95.0, 82.71, 0.59; GCF_009193305.1, s__Bifidobacterium sp009193305, 95.0, 82.62, 0.55; GC…	95.83	11	N/A	N/A
THIKA_4_bin.1	Lactobacillus crispatus	Species	4	1	187	99.02	0.092	36.8	20393	2273765	d__Bacteria;p__Firmicutes;c__Bacilli;o__Lactobacillales;f__Lactobacillaceae;g__Lactobacillus;s__Lactobacillus crispatus	GCF_002088015.1	95	d__Bacteria;p__Firmicutes;c__Bacilli;o__Lactobacillales;f__Lactobacillaceae;g__Lactobacillus;s__Lactobacillus crispatus	97.62	0.79	GCF_002088015.1	95	d__Bacteria;p__Firmicutes;c__Bacilli;o__Lactobacillales;f__Lactobacillaceae;g__Lactobacillus;s__Lactobacillus crispatus	97.62	0.79	d__Bacteria;p__Firmicutes;c__Bacilli;o__Lactobacillales;f__Lactobacillaceae;g__Lactobacillus;s__	taxonomic classification defined by topology and ANI	topological placement and ANI have congruent species assignments	GCF_000615285.1, s__Lactobacillus kitasatonis, 95.0, 83.34, 0.54; GCF_002706375.1, s__Lactobacillus amylovorus, 95.0, 82.97, 0.52; GCF_000614735.1, s__Lactobacillus gallinarum, 95.0, 82.86, 0.56; GCF_000160855.1, s__Lactobacillus helveticus, 95.0, 82.38, 0.52; GCF_001591845.1, s__Lactobacillus acidophilus, 95.0, 82.04, 0.53; GCF_001436305.1, s__Lactobacillus ultunensis, 95.0, 81.82, 0.51; GCF_900…	94.16	11	N/A	N/A
THIKA_5_bin.1	Lactobacillus iners	Species	5	1	9	98.85	0	32.5	185749	1300079	d__Bacteria;p__Firmicutes;c__Bacilli;o__Lactobacillales;f__Lactobacillaceae;g__Lactobacillus;s__Lactobacillus iners	GCF_000160875.1	95	d__Bacteria;p__Firmicutes;c__Bacilli;o__Lactobacillales;f__Lactobacillaceae;g__Lactobacillus;s__Lactobacillus iners	98.51	0.93	GCF_000160875.1	95	d__Bacteria;p__Firmicutes;c__Bacilli;o__Lactobacillales;f__Lactobacillaceae;g__Lactobacillus;s__Lactobacillus iners	98.51	0.93	d__Bacteria;p__Firmicutes;c__Bacilli;o__Lactobacillales;f__Lactobacillaceae;g__Lactobacillus;s__	taxonomic classification defined by topology and ANI	topological placement and ANI have congruent species assignments	GCF_003584685.1, s__Lactobacillus paragasseri, 95.0, 78.37, 0.21; GCF_000296835.1, s__Lactobacillus hominis, 95.0, 78.29, 0.2; GCF_000014425.1, s__Lactobacillus gasseri, 95.0, 78.14, 0.19; GCF_003423665.1, s__Lactobacillus rodentium, 95.0, 78.1, 0.2; GCF_002706375.1, s__Lactobacillus amylovorus, 95.0, 77.92, 0.12; GCF_000615285.1, s__Lactobacillus kitasatonis, 95.0, 77.91, 0.12; GCF_000159355.1, …	94.86	11	N/A	N/A
THIKA_6_bin.2	Lactobacillus crispatus	Species	6	2	23	99.02	0.092	36.6	129145	2057998	d__Bacteria;p__Firmicutes;c__Bacilli;o__Lactobacillales;f__Lactobacillaceae;g__Lactobacillus;s__Lactobacillus crispatus	GCF_002088015.1	95	d__Bacteria;p__Firmicutes;c__Bacilli;o__Lactobacillales;f__Lactobacillaceae;g__Lactobacillus;s__Lactobacillus crispatus	97.98	0.85	GCF_002088015.1	95	d__Bacteria;p__Firmicutes;c__Bacilli;o__Lactobacillales;f__Lactobacillaceae;g__Lactobacillus;s__Lactobacillus crispatus	97.98	0.85	d__Bacteria;p__Firmicutes;c__Bacilli;o__Lactobacillales;f__Lactobacillaceae;g__Lactobacillus;s__	taxonomic classification defined by topology and ANI	topological placement and ANI have congruent species assignments	GCF_000615285.1, s__Lactobacillus kitasatonis, 95.0, 82.91, 0.59; GCF_000614735.1, s__Lactobacillus gallinarum, 95.0, 82.8, 0.62; GCF_002706375.1, s__Lactobacillus amylovorus, 95.0, 82.45, 0.56; GCF_000160855.1, s__Lactobacillus helveticus, 95.0, 82.37, 0.52; GCF_001436305.1, s__Lactobacillus ultunensis, 95.0, 81.83, 0.54; GCF_001591845.1, s__Lactobacillus acidophilus, 95.0, 81.81, 0.56; GCF_9001…	95	11	N/A	N/A
THIKA_7_bin.1	Lactobacillus crispatus	Species	7	1	128	58.5	0.401	37	20660	1503718	d__Bacteria;p__Firmicutes;c__Bacilli;o__Lactobacillales;f__Lactobacillaceae;g__Lactobacillus;s__Lactobacillus crispatus	GCF_002088015.1	95	d__Bacteria;p__Firmicutes;c__Bacilli;o__Lactobacillales;f__Lactobacillaceae;g__Lactobacillus;s__Lactobacillus crispatus	97.4	0.73	GCF_002088015.1	95	d__Bacteria;p__Firmicutes;c__Bacilli;o__Lactobacillales;f__Lactobacillaceae;g__Lactobacillus;s__Lactobacillus crispatus	97.4	0.73	d__Bacteria;p__Firmicutes;c__Bacilli;o__Lactobacillales;f__Lactobacillaceae;g__Lactobacillus;s__	taxonomic classification defined by topology and ANI	topological placement and ANI have congruent species assignments	GCF_000615285.1, s__Lactobacillus kitasatonis, 95.0, 83.83, 0.5; GCF_000614735.1, s__Lactobacillus gallinarum, 95.0, 83.29, 0.53; GCF_002706375.1, s__Lactobacillus amylovorus, 95.0, 83.17, 0.56; GCF_000160855.1, s__Lactobacillus helveticus, 95.0, 82.34, 0.52; GCF_001591845.1, s__Lactobacillus acidophilus, 95.0, 82.02, 0.53; GCF_900103655.1, s__Lactobacillus kefiranofaciens, 95.0, 81.97, 0.52; GCF…	54.54	11	N/A	N/A
THIKA_8_bin.1	Bifidobacterium vaginale	Species	8	1	465	60.77	0.284	42.2	2147	958782	d__Bacteria;p__Actinobacteriota;c__Actinomycetia;o__Actinomycetales;f__Bifidobacteriaceae;g__Bifidobacterium;s__Bifidobacterium vaginale	GCF_001042655.1	95	d__Bacteria;p__Actinobacteriota;c__Actinomycetia;o__Actinomycetales;f__Bifidobacteriaceae;g__Bifidobacterium;s__Bifidobacterium vaginale	97.66	1	GCF_001042655.1	95	d__Bacteria;p__Actinobacteriota;c__Actinomycetia;o__Actinomycetales;f__Bifidobacteriaceae;g__Bifidobacterium;s__Bifidobacterium vaginale	97.66	1	d__Bacteria;p__Actinobacteriota;c__Actinomycetia;o__Actinomycetales;f__Bifidobacteriaceae;g__Bifidobacterium;s__	taxonomic classification defined by topology and ANI	topological placement and ANI have congruent species assignments	GCF_002884815.1, s__Bifidobacterium sp002884815, 95.0, 89.93, 0.89; GCF_001546455.1, s__Bifidobacterium vaginale_B, 95.0, 89.71, 0.83; GCF_003585735.1, s__Bifidobacterium sp003585735, 95.0, 85.47, 0.63; GCF_000263595.1, s__Bifidobacterium vaginale_E, 95.0, 85.35, 0.63; GCF_003585845.1, s__Bifidobacterium sp003585845, 95.0, 85.03, 0.66; GCF_000025205.1, s__Bifidobacterium vaginale_G, 95.0, 85.03, …	50.84	11	N/A	N/A
THIKA_8_bin.2	Lactobacillus crispatus	Species	8	2	146	98.37	0.092	36.9	23255	2171570	d__Bacteria;p__Firmicutes;c__Bacilli;o__Lactobacillales;f__Lactobacillaceae;g__Lactobacillus;s__Lactobacillus crispatus	GCF_002088015.1	95	d__Bacteria;p__Firmicutes;c__Bacilli;o__Lactobacillales;f__Lactobacillaceae;g__Lactobacillus;s__Lactobacillus crispatus	97.8	0.77	GCF_002088015.1	95	d__Bacteria;p__Firmicutes;c__Bacilli;o__Lactobacillales;f__Lactobacillaceae;g__Lactobacillus;s__Lactobacillus crispatus	97.8	0.77	d__Bacteria;p__Firmicutes;c__Bacilli;o__Lactobacillales;f__Lactobacillaceae;g__Lactobacillus;s__	taxonomic classification defined by topology and ANI	topological placement and ANI have congruent species assignments	GCF_000615285.1, s__Lactobacillus kitasatonis, 95.0, 83.11, 0.53; GCF_002706375.1, s__Lactobacillus amylovorus, 95.0, 82.9, 0.56; GCF_000614735.1, s__Lactobacillus gallinarum, 95.0, 82.64, 0.58; GCF_000160855.1, s__Lactobacillus helveticus, 95.0, 82.26, 0.5; GCF_001436305.1, s__Lactobacillus ultunensis, 95.0, 81.78, 0.54; GCF_001591845.1, s__Lactobacillus acidophilus, 95.0, 81.75, 0.52; GCF_90010…	94.18	11	N/A	N/A
THIKA_9_bin.1	Lactobacillus paragasseri	Species	9	1	32	99.22	0	34.6	86691	1911796	d__Bacteria;p__Firmicutes;c__Bacilli;o__Lactobacillales;f__Lactobacillaceae;g__Lactobacillus;s__Lactobacillus paragasseri	GCF_003584685.1	95	d__Bacteria;p__Firmicutes;c__Bacilli;o__Lactobacillales;f__Lactobacillaceae;g__Lactobacillus;s__Lactobacillus paragasseri	98.45	0.9	GCF_003584685.1	95	d__Bacteria;p__Firmicutes;c__Bacilli;o__Lactobacillales;f__Lactobacillaceae;g__Lactobacillus;s__Lactobacillus paragasseri	98.45	0.9	d__Bacteria;p__Firmicutes;c__Bacilli;o__Lactobacillales;f__Lactobacillaceae;g__Lactobacillus;s__	taxonomic classification defined by topology and ANI	topological placement and ANI have congruent species assignments	GCF_000014425.1, s__Lactobacillus gasseri, 95.0, 93.66, 0.85; GCF_001436695.1, s__Lactobacillus taiwanensis, 95.0, 86.43, 0.77; GCF_000159355.1, s__Lactobacillus johnsonii, 95.0, 85.54, 0.74; GCF_000296835.1, s__Lactobacillus hominis, 95.0, 81.6, 0.42; GCF_000160855.1, s__Lactobacillus helveticus, 95.0, 79.55, 0.26; GCF_001435325.1, s__Lactobacillus intestinalis, 95.0, 79.41, 0.26; GCF_900103655.…	94.98	11	N/A	N/A
THIKA_9_bin.2	Bifidobacterium vaginale	Species	9	2	6	100	0	41.3	330560	1610507	d__Bacteria;p__Actinobacteriota;c__Actinomycetia;o__Actinomycetales;f__Bifidobacteriaceae;g__Bifidobacterium;s__Bifidobacterium vaginale	GCF_001042655.1	95	d__Bacteria;p__Actinobacteriota;c__Actinomycetia;o__Actinomycetales;f__Bifidobacteriaceae;g__Bifidobacterium;s__Bifidobacterium vaginale	98.29	0.97	GCF_001042655.1	95	d__Bacteria;p__Actinobacteriota;c__Actinomycetia;o__Actinomycetales;f__Bifidobacteriaceae;g__Bifidobacterium;s__Bifidobacterium vaginale	98.29	0.97	d__Bacteria;p__Actinobacteriota;c__Actinomycetia;o__Actinomycetales;f__Bifidobacteriaceae;g__Bifidobacterium;s__	taxonomic classification defined by topology and ANI	topological placement and ANI have congruent species assignments	GCF_002884815.1, s__Bifidobacterium sp002884815, 95.0, 89.51, 0.83; GCF_001546455.1, s__Bifidobacterium vaginale_B, 95.0, 87.74, 0.81; GCF_000025205.1, s__Bifidobacterium vaginale_G, 95.0, 84.11, 0.58; GCF_000263595.1, s__Bifidobacterium vaginale_E, 95.0, 83.9, 0.57; GCF_002896555.1, s__Bifidobacterium vaginale_F, 95.0, 83.67, 0.48; GCF_001546485.1, s__Bifidobacterium vaginale_D, 95.0, 83.64, 0.5…	94.86	11	N/A	N/A
THIKA_10_bin.1	Lactobacillus crispatus	Species	10	1	202	97.12	0	37	15774	1968482	d__Bacteria;p__Firmicutes;c__Bacilli;o__Lactobacillales;f__Lactobacillaceae;g__Lactobacillus;s__Lactobacillus crispatus	GCF_002088015.1	95	d__Bacteria;p__Firmicutes;c__Bacilli;o__Lactobacillales;f__Lactobacillaceae;g__Lactobacillus;s__Lactobacillus crispatus	97.54	0.78	GCF_002088015.1	95	d__Bacteria;p__Firmicutes;c__Bacilli;o__Lactobacillales;f__Lactobacillaceae;g__Lactobacillus;s__Lactobacillus crispatus	97.54	0.78	d__Bacteria;p__Firmicutes;c__Bacilli;o__Lactobacillales;f__Lactobacillaceae;g__Lactobacillus;s__	taxonomic classification defined by topology and ANI	topological placement and ANI have congruent species assignments	GCF_000615285.1, s__Lactobacillus kitasatonis, 95.0, 83.17, 0.57; GCF_002706375.1, s__Lactobacillus amylovorus, 95.0, 82.7, 0.6; GCF_000614735.1, s__Lactobacillus gallinarum, 95.0, 82.63, 0.59; GCF_000160855.1, s__Lactobacillus helveticus, 95.0, 82.53, 0.56; GCF_001436305.1, s__Lactobacillus ultunensis, 95.0, 82.1, 0.56; GCF_001591845.1, s__Lactobacillus acidophilus, 95.0, 81.83, 0.58; GCF_900103…	93.35	11	N/A	N/A
THIKA_11_bin.1	Limosilactobacillus	Genus	11	1	490	83.22	1.376	40.1	4412	1717418	d__Bacteria;p__Firmicutes;c__Bacilli;o__Lactobacillales;f__Lactobacillaceae;g__Limosilactobacillus;s__	N/A	N/A	N/A	N/A	N/A	GCF_002871555.1	95	d__Bacteria;p__Firmicutes;c__Bacilli;o__Lactobacillales;f__Lactobacillaceae;g__Limosilactobacillus;s__Limosilactobacillus vaginalis_A	93.26	0.87	d__Bacteria;p__Firmicutes;c__Bacilli;o__Lactobacillales;f__Lactobacillaceae;g__Limosilactobacillus;s__	taxonomic classification defined by topology and ANI	N/A	GCF_000159435.1, s__Limosilactobacillus vaginalis, 95.0, 90.91, 0.82; GCF_014145505.1, s__Limosilactobacillus sp014145505, 95.0, 82.29, 0.62; GCF_000161935.1, s__Limosilactobacillus coleohominis, 95.0, 80.95, 0.17; GCF_001435345.1, s__Limosilactobacillus pontis, 95.0, 80.22, 0.15; GCF_001435935.1, s__Limosilactobacillus panis, 95.0, 80.13, 0.21; GCF_003072625.1, s__Limosilactobacillus reuteri_D, …	81.06	11	0.998241	Genome not assigned to closest species as it falls outside its pre-defined ANI radius
THIKA_11_bin.2	Lactobacillus crispatus	Species	11	2	157	99.02	0	36.7	18927	1976246	d__Bacteria;p__Firmicutes;c__Bacilli;o__Lactobacillales;f__Lactobacillaceae;g__Lactobacillus;s__Lactobacillus crispatus	GCF_002088015.1	95	d__Bacteria;p__Firmicutes;c__Bacilli;o__Lactobacillales;f__Lactobacillaceae;g__Lactobacillus;s__Lactobacillus crispatus	97.63	0.83	GCF_002088015.1	95	d__Bacteria;p__Firmicutes;c__Bacilli;o__Lactobacillales;f__Lactobacillaceae;g__Lactobacillus;s__Lactobacillus crispatus	97.63	0.83	d__Bacteria;p__Firmicutes;c__Bacilli;o__Lactobacillales;f__Lactobacillaceae;g__Lactobacillus;s__	taxonomic classification defined by topology and ANI	topological placement and ANI have congruent species assignments	GCF_000615285.1, s__Lactobacillus kitasatonis, 95.0, 83.19, 0.58; GCF_002706375.1, s__Lactobacillus amylovorus, 95.0, 82.73, 0.59; GCF_000614735.1, s__Lactobacillus gallinarum, 95.0, 82.72, 0.57; GCF_000160855.1, s__Lactobacillus helveticus, 95.0, 82.27, 0.54; GCF_001591845.1, s__Lactobacillus acidophilus, 95.0, 82.0, 0.56; GCF_001436305.1, s__Lactobacillus ultunensis, 95.0, 81.94, 0.57; GCF_9001…	95	11	N/A	N/A
THIKA_12_bin.1	Bifidobacterium breve	Species	12	1	27	99.69	0	58.7	123252	2258801	d__Bacteria;p__Actinobacteriota;c__Actinomycetia;o__Actinomycetales;f__Bifidobacteriaceae;g__Bifidobacterium;s__Bifidobacterium breve	GCF_001025175.1	95	d__Bacteria;p__Actinobacteriota;c__Actinomycetia;o__Actinomycetales;f__Bifidobacteriaceae;g__Bifidobacterium;s__Bifidobacterium breve	98.02	0.9	GCF_001025175.1	95	d__Bacteria;p__Actinobacteriota;c__Actinomycetia;o__Actinomycetales;f__Bifidobacteriaceae;g__Bifidobacterium;s__Bifidobacterium breve	98.02	0.9	d__Bacteria;p__Actinobacteriota;c__Actinomycetia;o__Actinomycetales;f__Bifidobacteriaceae;g__Bifidobacterium;s__	taxonomic classification defined by topology and ANI	topological placement and ANI have congruent species assignments	GCF_000269965.1, s__Bifidobacterium infantis, 95.0, 87.3, 0.73; GCF_000196555.1, s__Bifidobacterium longum, 95.0, 86.68, 0.67; GCF_003129905.1, s__Bifidobacterium callitrichidarum, 95.0, 83.07, 0.63; GCF_000741695.1, s__Bifidobacterium reuteri, 95.0, 82.79, 0.6; GCF_002259745.1, s__Bifidobacterium myosotis, 95.0, 82.69, 0.61; GCF_009193305.1, s__Bifidobacterium sp009193305, 95.0, 82.64, 0.56; GCF…	94.98	11	N/A	N/A
THIKA_12_bin.2	Lactobacillus crispatus	Species	12	2	27	99.02	0	36.8	126381	1926864	d__Bacteria;p__Firmicutes;c__Bacilli;o__Lactobacillales;f__Lactobacillaceae;g__Lactobacillus;s__Lactobacillus crispatus	GCF_002088015.1	95	d__Bacteria;p__Firmicutes;c__Bacilli;o__Lactobacillales;f__Lactobacillaceae;g__Lactobacillus;s__Lactobacillus crispatus	98.05	0.84	GCF_002088015.1	95	d__Bacteria;p__Firmicutes;c__Bacilli;o__Lactobacillales;f__Lactobacillaceae;g__Lactobacillus;s__Lactobacillus crispatus	98.05	0.84	d__Bacteria;p__Firmicutes;c__Bacilli;o__Lactobacillales;f__Lactobacillaceae;g__Lactobacillus;s__	taxonomic classification defined by topology and ANI	topological placement and ANI have congruent species assignments	GCF_000615285.1, s__Lactobacillus kitasatonis, 95.0, 83.16, 0.58; GCF_000614735.1, s__Lactobacillus gallinarum, 95.0, 82.9, 0.6; GCF_002706375.1, s__Lactobacillus amylovorus, 95.0, 82.88, 0.58; GCF_000160855.1, s__Lactobacillus helveticus, 95.0, 82.23, 0.54; GCF_001591845.1, s__Lactobacillus acidophilus, 95.0, 81.95, 0.56; GCF_900103655.1, s__Lactobacillus kefiranofaciens, 95.0, 81.75, 0.57; GCF_…	95	11	N/A	N/A
THIKA_13_bin.1	Lactobacillus crispatus	Species	13	1	192	99.02	0	36.7	19391	2095538	d__Bacteria;p__Firmicutes;c__Bacilli;o__Lactobacillales;f__Lactobacillaceae;g__Lactobacillus;s__Lactobacillus crispatus	GCF_002088015.1	95	d__Bacteria;p__Firmicutes;c__Bacilli;o__Lactobacillales;f__Lactobacillaceae;g__Lactobacillus;s__Lactobacillus crispatus	97.59	0.8	GCF_002088015.1	95	d__Bacteria;p__Firmicutes;c__Bacilli;o__Lactobacillales;f__Lactobacillaceae;g__Lactobacillus;s__Lactobacillus crispatus	97.59	0.8	d__Bacteria;p__Firmicutes;c__Bacilli;o__Lactobacillales;f__Lactobacillaceae;g__Lactobacillus;s__	taxonomic classification defined by topology and ANI	topological placement and ANI have congruent species assignments	GCF_000615285.1, s__Lactobacillus kitasatonis, 95.0, 82.97, 0.56; GCF_002706375.1, s__Lactobacillus amylovorus, 95.0, 82.73, 0.57; GCF_000614735.1, s__Lactobacillus gallinarum, 95.0, 82.69, 0.57; GCF_000160855.1, s__Lactobacillus helveticus, 95.0, 82.31, 0.55; GCF_900103655.1, s__Lactobacillus kefiranofaciens, 95.0, 81.87, 0.57; GCF_001591845.1, s__Lactobacillus acidophilus, 95.0, 81.87, 0.56; GC…	95	11	N/A	N/A
THIKA_14_bin.1	Lactobacillus crispatus	Species	14	1	191	95.82	0.742	36.7	14938	2080856	d__Bacteria;p__Firmicutes;c__Bacilli;o__Lactobacillales;f__Lactobacillaceae;g__Lactobacillus;s__Lactobacillus crispatus	GCF_002088015.1	95	d__Bacteria;p__Firmicutes;c__Bacilli;o__Lactobacillales;f__Lactobacillaceae;g__Lactobacillus;s__Lactobacillus crispatus	97.42	0.79	GCF_002088015.1	95	d__Bacteria;p__Firmicutes;c__Bacilli;o__Lactobacillales;f__Lactobacillaceae;g__Lactobacillus;s__Lactobacillus crispatus	97.42	0.79	d__Bacteria;p__Firmicutes;c__Bacilli;o__Lactobacillales;f__Lactobacillaceae;g__Lactobacillus;s__	taxonomic classification defined by topology and ANI	topological placement and ANI have congruent species assignments	GCF_000615285.1, s__Lactobacillus kitasatonis, 95.0, 82.86, 0.55; GCF_000614735.1, s__Lactobacillus gallinarum, 95.0, 82.57, 0.55; GCF_002706375.1, s__Lactobacillus amylovorus, 95.0, 82.55, 0.55; GCF_000160855.1, s__Lactobacillus helveticus, 95.0, 82.51, 0.51; GCF_001436305.1, s__Lactobacillus ultunensis, 95.0, 81.88, 0.54; GCF_900103655.1, s__Lactobacillus kefiranofaciens, 95.0, 81.88, 0.54; GCF…	90.95	11	N/A	N/A
THIKA_15_bin.1	Limosilactobacillus vaginalis_A	Species	15	1	350	85.73	2.513	39.6	6297	1852921	d__Bacteria;p__Firmicutes;c__Bacilli;o__Lactobacillales;f__Lactobacillaceae;g__Limosilactobacillus;s__Limosilactobacillus vaginalis_A	GCF_002871555.1	95	d__Bacteria;p__Firmicutes;c__Bacilli;o__Lactobacillales;f__Lactobacillaceae;g__Limosilactobacillus;s__Limosilactobacillus vaginalis_A	97.46	0.74	GCF_002871555.1	95	d__Bacteria;p__Firmicutes;c__Bacilli;o__Lactobacillales;f__Lactobacillaceae;g__Limosilactobacillus;s__Limosilactobacillus vaginalis_A	97.46	0.74	d__Bacteria;p__Firmicutes;c__Bacilli;o__Lactobacillales;f__Lactobacillaceae;g__Limosilactobacillus;s__	taxonomic classification defined by topology and ANI	topological placement and ANI have congruent species assignments	GCF_000159435.1, s__Limosilactobacillus vaginalis, 95.0, 91.48, 0.68; GCF_014145505.1, s__Limosilactobacillus sp014145505, 95.0, 82.74, 0.49; GCF_000161935.1, s__Limosilactobacillus coleohominis, 95.0, 80.45, 0.15; GCF_014635905.1, s__Limosilactobacillus caviae, 95.0, 80.38, 0.21; GCF_014145615.1, s__Limosilactobacillus sp014145615, 95.0, 79.78, 0.22; GCF_001435935.1, s__Limosilactobacillus panis…	83.36	11	N/A	N/A
THIKA_15_bin.2	Lactobacillus crispatus	Species	15	2	246	97.33	2.473	36.8	12589	2081696	d__Bacteria;p__Firmicutes;c__Bacilli;o__Lactobacillales;f__Lactobacillaceae;g__Lactobacillus;s__Lactobacillus crispatus	GCF_002088015.1	95	d__Bacteria;p__Firmicutes;c__Bacilli;o__Lactobacillales;f__Lactobacillaceae;g__Lactobacillus;s__Lactobacillus crispatus	97.54	0.77	GCF_002088015.1	95	d__Bacteria;p__Firmicutes;c__Bacilli;o__Lactobacillales;f__Lactobacillaceae;g__Lactobacillus;s__Lactobacillus crispatus	97.54	0.77	d__Bacteria;p__Firmicutes;c__Bacilli;o__Lactobacillales;f__Lactobacillaceae;g__Lactobacillus;s__	taxonomic classification defined by topology and ANI	topological placement and ANI have congruent species assignments	GCF_000615285.1, s__Lactobacillus kitasatonis, 95.0, 82.88, 0.53; GCF_000614735.1, s__Lactobacillus gallinarum, 95.0, 82.63, 0.53; GCF_002706375.1, s__Lactobacillus amylovorus, 95.0, 82.49, 0.56; GCF_000160855.1, s__Lactobacillus helveticus, 95.0, 82.49, 0.52; GCF_001436305.1, s__Lactobacillus ultunensis, 95.0, 81.97, 0.52; GCF_001591845.1, s__Lactobacillus acidophilus, 95.0, 81.83, 0.52; GCF_900…	92.56	11	N/A	N/A
THIKA_16_bin.1	Lactobacillus johnsonii	Species	16	1	178	95.17	3.49	34.4	37127	1685455	d__Bacteria;p__Firmicutes;c__Bacilli;o__Lactobacillales;f__Lactobacillaceae;g__Lactobacillus;s__Lactobacillus johnsonii	GCF_000159355.1	95	d__Bacteria;p__Firmicutes;c__Bacilli;o__Lactobacillales;f__Lactobacillaceae;g__Lactobacillus;s__Lactobacillus johnsonii	98.66	0.9	GCF_000159355.1	95	d__Bacteria;p__Firmicutes;c__Bacilli;o__Lactobacillales;f__Lactobacillaceae;g__Lactobacillus;s__Lactobacillus johnsonii	98.66	0.9	d__Bacteria;p__Firmicutes;c__Bacilli;o__Lactobacillales;f__Lactobacillaceae;g__Lactobacillus;s__	taxonomic classification defined by topology and ANI	topological placement and ANI have congruent species assignments	GCF_001436695.1, s__Lactobacillus taiwanensis, 95.0, 87.38, 0.79; GCF_003584685.1, s__Lactobacillus paragasseri, 95.0, 85.71, 0.82; GCF_000014425.1, s__Lactobacillus gasseri, 95.0, 85.59, 0.81; GCF_000296835.1, s__Lactobacillus hominis, 95.0, 80.08, 0.41; GCF_001435325.1, s__Lactobacillus intestinalis, 95.0, 79.77, 0.28; GCF_003423665.1, s__Lactobacillus rodentium, 95.0, 79.66, 0.31; GCF_00017847…	87.59	11	N/A	N/A
THIKA_17_bin.1	Lactobacillus iners	Species	17	1	7	99.41	0.442	32.6	191860	1276030	d__Bacteria;p__Firmicutes;c__Bacilli;o__Lactobacillales;f__Lactobacillaceae;g__Lactobacillus;s__Lactobacillus iners	GCF_000160875.1	95	d__Bacteria;p__Firmicutes;c__Bacilli;o__Lactobacillales;f__Lactobacillaceae;g__Lactobacillus;s__Lactobacillus iners	98.59	0.93	GCF_000160875.1	95	d__Bacteria;p__Firmicutes;c__Bacilli;o__Lactobacillales;f__Lactobacillaceae;g__Lactobacillus;s__Lactobacillus iners	98.59	0.93	d__Bacteria;p__Firmicutes;c__Bacilli;o__Lactobacillales;f__Lactobacillaceae;g__Lactobacillus;s__	taxonomic classification defined by topology and ANI	topological placement and ANI have congruent species assignments	GCF_002706375.1, s__Lactobacillus amylovorus, 95.0, 78.56, 0.12; GCF_003584685.1, s__Lactobacillus paragasseri, 95.0, 78.29, 0.2; GCF_003423665.1, s__Lactobacillus rodentium, 95.0, 78.12, 0.21; GCF_000296835.1, s__Lactobacillus hominis, 95.0, 78.1, 0.2; GCF_000014425.1, s__Lactobacillus gasseri, 95.0, 78.08, 0.22; GCF_000159355.1, s__Lactobacillus johnsonii, 95.0, 78.07, 0.21; GCF_000615285.1, s_…	94.84	11	N/A	N/A
Footnotes:
MAG = metagenome-assembled genome

## Sheet: Table S16
Table S16. Pasolli† metagenomes
Metagenome ID	Number of Contigs	Largest Contig	Total Length	GC (%)	N50
HMP_2012__SRS016516	314	131746	2217370	36.77	26539
HMP_2012__SRS065347	896	85117	3721740	35.82	8722
HMP_2012__SRS021969	391	68773	2333078	36.97	16809
FerrettiP_2018__CA_C10032MS2545VA_t0M15	589	82449	2686297	37.21	16555
HMP_2012__SRS015072	514	103151	3768452	35.33	19910
FerrettiP_2018__CA_C10043MS2743VA_t0M15	408	81384	2541789	36.69	18136
HMP_2012__SRS017520	560	58989	2541095	36.71	12618
HMP_2012__SRS014466	1157	83362	3326589	35.9	13077
FerrettiP_2018__CA_C10035MS2599VA_t0M15	1362	55403	3265119	39.09	7688
HMP_2012__SRS051505	2878	275970	6938034	37.8	5526
HMP_2012__SRS019600	334	98902	2259716	36.83	19719
Footnotes:
† Selected from metagenomes analyzed by Pasolli et al., Cell, 2019

## Sheet: Table S17
Table S17. Pasolli† MAGs
MAG ID	Study	Sample ID	Bin ID	Pasolli sgbid	GTDB-tk Classification	Taxonomic Level	Total Number of Contigs	Number of Contigs (>= 500)	Largest Contig	Total Length	GC (%)	N50	Completeness	Contamination	Strain Heterogeneity	Host	Isolation Source (Body Site)	Isolation Source (Body Subsite)	Age In Years	Age Category	Westernized	Country	usgb	GTDB-tk Lineage	FastANI Reference	FastANI Reference Radius	FastANI Taxonomy	FastANI ANI	FastANI AF	Closest Placement Reference	Closest Placement Radius	Closest Placement Taxonomy	Closest Placement ANI	Closest Placement AF	pplacer Taxonomy	Classification Method	Note	Other Related References ( Genome ID, Species Name, Radius, ANI, AF )	MSA Percent	Translation Table	Red Value	Warnings
FerrettiP_2018__CA_C10024MS2405VA_t0M15__bin.1	FerrettiP_2018	CA_C10024MS2405VA_t0M15	1	7045	Lactobacillus crispatus	Species	170	170	53133	1942723	36.64	19685	94.26	0.09	0	Homo sapiens	Vagina	vaginal_introitus	34	Adult	Yes	ITA	No	d__Bacteria;p__Firmicutes;c__Bacilli;o__Lactobacillales;f__Lactobacillaceae;g__Lactobacillus;s__Lactobacillus crispatus	GCF_002088015.1	95	d__Bacteria;p__Firmicutes;c__Bacilli;o__Lactobacillales;f__Lactobacillaceae;g__Lactobacillus;s__Lactobacillus crispatus	97.53	0.8	GCF_002088015.1	95	d__Bacteria;p__Firmicutes;c__Bacilli;o__Lactobacillales;f__Lactobacillaceae;g__Lactobacillus;s__Lactobacillus crispatus	97.53	0.8	d__Bacteria;p__Firmicutes;c__Bacilli;o__Lactobacillales;f__Lactobacillaceae;g__Lactobacillus;s__	taxonomic classification defined by topology and ANI	topological placement and ANI have congruent species assignments	GCF_000615285.1, s__Lactobacillus kitasatonis, 95.0, 82.87, 0.53; GCF_002706375.1, s__Lactobacillus amylovorus, 95.0, 82.62, 0.58; GCF_000614735.1, s__Lactobacillus gallinarum, 95.0, 82.53, 0.57; GCF_000160855.1, s__Lactobacillus helveticus, 95.0, 82.26, 0.54; GCF_001436305.1, s__Lactobacillus ultunensis, 95.0, 81.69, 0.55; GCF_001591845.1, s__Lactobacillus acidophilus, 95.0, 81.54, 0.54; GCF_900…	75.46	11	N/A	N/A
FerrettiP_2018__CA_C10032MS2545VA_t0M15__bin.1	FerrettiP_2018	CA_C10032MS2545VA_t0M15	1	7045	Lactobacillus crispatus	Species	79	79	82449	1174259	37.65	22979	56.84	0.09	0	Homo sapiens	Vagina	vaginal_introitus	36	Adult	Yes	ITA	No	d__Bacteria;p__Firmicutes;c__Bacilli;o__Lactobacillales;f__Lactobacillaceae;g__Lactobacillus;s__Lactobacillus crispatus	GCF_002088015.1	95	d__Bacteria;p__Firmicutes;c__Bacilli;o__Lactobacillales;f__Lactobacillaceae;g__Lactobacillus;s__Lactobacillus crispatus	97.26	0.82	GCF_002088015.1	95	d__Bacteria;p__Firmicutes;c__Bacilli;o__Lactobacillales;f__Lactobacillaceae;g__Lactobacillus;s__Lactobacillus crispatus	97.26	0.82	d__Bacteria;p__Firmicutes;c__Bacilli;o__Lactobacillales;f__Lactobacillaceae;g__Lactobacillus;s__	taxonomic classification defined by topology and ANI	topological placement and ANI have congruent species assignments	GCF_000615285.1, s__Lactobacillus kitasatonis, 95.0, 82.99, 0.6; GCF_000614735.1, s__Lactobacillus gallinarum, 95.0, 82.86, 0.58; GCF_002706375.1, s__Lactobacillus amylovorus, 95.0, 82.86, 0.65; GCF_000160855.1, s__Lactobacillus helveticus, 95.0, 82.43, 0.56; GCF_001436305.1, s__Lactobacillus ultunensis, 95.0, 81.81, 0.6; GCF_001591845.1, s__Lactobacillus acidophilus, 95.0, 81.57, 0.61; GCF_90010…	52.37	11	N/A	N/A
FerrettiP_2018__CA_C10034MS2581VA_t0M16__bin.1	FerrettiP_2018	CA_C10034MS2581VA_t0M16	1	7045	Lactobacillus crispatus	Species	282	282	50992	1805103	37.12	9278	96.47	0.86	0	Homo sapiens	Vagina	vaginal_introitus	30	Adult	Yes	ITA	No	d__Bacteria;p__Firmicutes;c__Bacilli;o__Lactobacillales;f__Lactobacillaceae;g__Lactobacillus;s__Lactobacillus crispatus	GCF_002088015.1	95	d__Bacteria;p__Firmicutes;c__Bacilli;o__Lactobacillales;f__Lactobacillaceae;g__Lactobacillus;s__Lactobacillus crispatus	97.68	0.85	GCF_002088015.1	95	d__Bacteria;p__Firmicutes;c__Bacilli;o__Lactobacillales;f__Lactobacillaceae;g__Lactobacillus;s__Lactobacillus crispatus	97.68	0.85	d__Bacteria;p__Firmicutes;c__Bacilli;o__Lactobacillales;f__Lactobacillaceae;g__Lactobacillus;s__	taxonomic classification defined by topology and ANI	topological placement and ANI have congruent species assignments	GCF_000615285.1, s__Lactobacillus kitasatonis, 95.0, 83.12, 0.63; GCF_002706375.1, s__Lactobacillus amylovorus, 95.0, 82.99, 0.63; GCF_000614735.1, s__Lactobacillus gallinarum, 95.0, 82.97, 0.62; GCF_000160855.1, s__Lactobacillus helveticus, 95.0, 82.33, 0.61; GCF_001436305.1, s__Lactobacillus ultunensis, 95.0, 82.05, 0.62; GCF_001591845.1, s__Lactobacillus acidophilus, 95.0, 81.98, 0.62; GCF_900…	93.59	11	N/A	N/A
FerrettiP_2018__CA_C10035MS2599VA_t0M15__bin.1	FerrettiP_2018	CA_C10035MS2599VA_t0M15	1	7045	Lactobacillus crispatus	Species	123	123	55403	1191197	37.72	14808	57.78	0.09	0	Homo sapiens	Vagina	vaginal_introitus	35	Adult	Yes	ITA	No	d__Bacteria;p__Firmicutes;c__Bacilli;o__Lactobacillales;f__Lactobacillaceae;g__Lactobacillus;s__Lactobacillus crispatus	GCF_002088015.1	95	d__Bacteria;p__Firmicutes;c__Bacilli;o__Lactobacillales;f__Lactobacillaceae;g__Lactobacillus;s__Lactobacillus crispatus	97.47	0.79	GCF_002088015.1	95	d__Bacteria;p__Firmicutes;c__Bacilli;o__Lactobacillales;f__Lactobacillaceae;g__Lactobacillus;s__Lactobacillus crispatus	97.47	0.79	d__Bacteria;p__Firmicutes;c__Bacilli;o__Lactobacillales;f__Lactobacillaceae;g__Lactobacillus;s__	taxonomic classification defined by topology and ANI	topological placement and ANI have congruent species assignments	GCF_000615285.1, s__Lactobacillus kitasatonis, 95.0, 83.72, 0.6; GCF_002706375.1, s__Lactobacillus amylovorus, 95.0, 83.62, 0.67; GCF_000614735.1, s__Lactobacillus gallinarum, 95.0, 83.38, 0.6; GCF_000160855.1, s__Lactobacillus helveticus, 95.0, 83.0, 0.58; GCF_001436305.1, s__Lactobacillus ultunensis, 95.0, 82.7, 0.61; GCF_001591845.1, s__Lactobacillus acidophilus, 95.0, 82.56, 0.6; GCF_90010365…	63.65	11	N/A	N/A
FerrettiP_2018__CA_C10043MS2743VA_t0M15__bin.2	FerrettiP_2018	CA_C10043MS2743VA_t0M15	2	7045	Lactobacillus crispatus	Species	83	83	68869	1336375	37.27	21095	53.45	0	0	Homo sapiens	Vagina	vaginal_introitus	NA	Adult	Yes	ITA	No	d__Bacteria;p__Firmicutes;c__Bacilli;o__Lactobacillales;f__Lactobacillaceae;g__Lactobacillus;s__Lactobacillus crispatus	GCF_002088015.1	95	d__Bacteria;p__Firmicutes;c__Bacilli;o__Lactobacillales;f__Lactobacillaceae;g__Lactobacillus;s__Lactobacillus crispatus	97.42	0.84	GCF_002088015.1	95	d__Bacteria;p__Firmicutes;c__Bacilli;o__Lactobacillales;f__Lactobacillaceae;g__Lactobacillus;s__Lactobacillus crispatus	97.42	0.84	d__Bacteria;p__Firmicutes;c__Bacilli;o__Lactobacillales;f__Lactobacillaceae;g__Lactobacillus;s__	taxonomic classification defined by topology and ANI	topological placement and ANI have congruent species assignments	GCF_000615285.1, s__Lactobacillus kitasatonis, 95.0, 83.04, 0.6; GCF_000614735.1, s__Lactobacillus gallinarum, 95.0, 82.89, 0.61; GCF_002706375.1, s__Lactobacillus amylovorus, 95.0, 82.75, 0.64; GCF_000160855.1, s__Lactobacillus helveticus, 95.0, 82.23, 0.57; GCF_001436305.1, s__Lactobacillus ultunensis, 95.0, 81.76, 0.57; GCF_001591845.1, s__Lactobacillus acidophilus, 95.0, 81.68, 0.59; GCF_9001…	52.37	11	N/A	N/A
HMP_2012__SRS014465__bin.1	HMP_2012	SRS014465	1	7045	Lactobacillus crispatus	Species	161	161	93593	2056619	36.79	20093	97.51	0.09	0	Homo sapiens	Vagina	vaginal_introitus	28	Adult	Yes	USA	No	d__Bacteria;p__Firmicutes;c__Bacilli;o__Lactobacillales;f__Lactobacillaceae;g__Lactobacillus;s__Lactobacillus crispatus	GCF_002088015.1	95	d__Bacteria;p__Firmicutes;c__Bacilli;o__Lactobacillales;f__Lactobacillaceae;g__Lactobacillus;s__Lactobacillus crispatus	97.69	0.78	GCF_002088015.1	95	d__Bacteria;p__Firmicutes;c__Bacilli;o__Lactobacillales;f__Lactobacillaceae;g__Lactobacillus;s__Lactobacillus crispatus	97.69	0.78	d__Bacteria;p__Firmicutes;c__Bacilli;o__Lactobacillales;f__Lactobacillaceae;g__Lactobacillus;s__	taxonomic classification defined by topology and ANI	topological placement and ANI have congruent species assignments	GCF_000615285.1, s__Lactobacillus kitasatonis, 95.0, 82.92, 0.55; GCF_002706375.1, s__Lactobacillus amylovorus, 95.0, 82.84, 0.59; GCF_000614735.1, s__Lactobacillus gallinarum, 95.0, 82.62, 0.55; GCF_000160855.1, s__Lactobacillus helveticus, 95.0, 82.22, 0.52; GCF_001436305.1, s__Lactobacillus ultunensis, 95.0, 81.9, 0.53; GCF_001591845.1, s__Lactobacillus acidophilus, 95.0, 81.86, 0.55; GCF_9001…	91.42	11	N/A	N/A
HMP_2012__SRS014466__bin.1	HMP_2012	SRS014466	1	7045	Lactobacillus crispatus	Species	83	83	70535	1294439	37.07	22985	50.76	1.02	0	Homo sapiens	Vagina	mid_vagina	28	Adult	Yes	USA	No	d__Bacteria;p__Firmicutes;c__Bacilli;o__Lactobacillales;f__Lactobacillaceae;g__Lactobacillus;s__Lactobacillus crispatus	GCF_002088015.1	95	d__Bacteria;p__Firmicutes;c__Bacilli;o__Lactobacillales;f__Lactobacillaceae;g__Lactobacillus;s__Lactobacillus crispatus	97.21	0.72	GCF_002088015.1	95	d__Bacteria;p__Firmicutes;c__Bacilli;o__Lactobacillales;f__Lactobacillaceae;g__Lactobacillus;s__Lactobacillus crispatus	97.21	0.72	d__Bacteria;p__Firmicutes;c__Bacilli;o__Lactobacillales;f__Lactobacillaceae;g__Lactobacillus;s__	taxonomic classification defined by topology and ANI	topological placement and ANI have congruent species assignments	GCF_000615285.1, s__Lactobacillus kitasatonis, 95.0, 83.36, 0.52; GCF_000614735.1, s__Lactobacillus gallinarum, 95.0, 83.23, 0.49; GCF_002706375.1, s__Lactobacillus amylovorus, 95.0, 83.2, 0.56; GCF_000160855.1, s__Lactobacillus helveticus, 95.0, 82.38, 0.48; GCF_001436305.1, s__Lactobacillus ultunensis, 95.0, 82.29, 0.5; GCF_001591845.1, s__Lactobacillus acidophilus, 95.0, 81.92, 0.51; GCF_90010…	47.93	11	N/A	N/A
HMP_2012__SRS014466__bin.2	HMP_2012	SRS014466	2	7045	Lactobacillus crispatus	Species	69	69	83362	898559	35.86	36076	51.72	0	0	Homo sapiens	Vagina	mid_vagina	28	Adult	Yes	USA	No	d__Bacteria;p__Firmicutes;c__Bacilli;o__Lactobacillales;f__Lactobacillaceae;g__Lactobacillus;s__Lactobacillus crispatus	GCF_002088015.1	95	d__Bacteria;p__Firmicutes;c__Bacilli;o__Lactobacillales;f__Lactobacillaceae;g__Lactobacillus;s__Lactobacillus crispatus	97.67	0.81	GCF_002088015.1	95	d__Bacteria;p__Firmicutes;c__Bacilli;o__Lactobacillales;f__Lactobacillaceae;g__Lactobacillus;s__Lactobacillus crispatus	97.67	0.81	d__Bacteria;p__Firmicutes;c__Bacilli;o__Lactobacillales;f__Lactobacillaceae;g__Lactobacillus;s__	taxonomic classification defined by topology and ANI	topological placement and ANI have congruent species assignments	GCF_000615285.1, s__Lactobacillus kitasatonis, 95.0, 82.23, 0.56; GCF_000160855.1, s__Lactobacillus helveticus, 95.0, 81.97, 0.51; GCF_000614735.1, s__Lactobacillus gallinarum, 95.0, 81.96, 0.57; GCF_002706375.1, s__Lactobacillus amylovorus, 95.0, 81.84, 0.57; GCF_001591845.1, s__Lactobacillus acidophilus, 95.0, 81.81, 0.53; GCF_001436305.1, s__Lactobacillus ultunensis, 95.0, 81.38, 0.52; GCF_900…	45.38	11	N/A	N/A
HMP_2012__SRS014494__bin.1	HMP_2012	SRS014494	1	7045	Lactobacillus crispatus	Species	235	235	53152	2116342	36.6	12368	96.7	1.65	12.5	Homo sapiens	Vagina	posterior_fornix	28	Adult	Yes	USA	No	d__Bacteria;p__Firmicutes;c__Bacilli;o__Lactobacillales;f__Lactobacillaceae;g__Lactobacillus;s__Lactobacillus crispatus	GCF_002088015.1	95	d__Bacteria;p__Firmicutes;c__Bacilli;o__Lactobacillales;f__Lactobacillaceae;g__Lactobacillus;s__Lactobacillus crispatus	97.58	0.77	GCF_002088015.1	95	d__Bacteria;p__Firmicutes;c__Bacilli;o__Lactobacillales;f__Lactobacillaceae;g__Lactobacillus;s__Lactobacillus crispatus	97.58	0.77	d__Bacteria;p__Firmicutes;c__Bacilli;o__Lactobacillales;f__Lactobacillaceae;g__Lactobacillus;s__	taxonomic classification defined by topology and ANI	topological placement and ANI have congruent species assignments	GCF_002706375.1, s__Lactobacillus amylovorus, 95.0, 82.94, 0.56; GCF_000615285.1, s__Lactobacillus kitasatonis, 95.0, 82.91, 0.53; GCF_000614735.1, s__Lactobacillus gallinarum, 95.0, 82.62, 0.53; GCF_000160855.1, s__Lactobacillus helveticus, 95.0, 82.25, 0.49; GCF_001591845.1, s__Lactobacillus acidophilus, 95.0, 81.92, 0.52; GCF_001436305.1, s__Lactobacillus ultunensis, 95.0, 81.9, 0.52; GCF_9001…	83.86	11	N/A	N/A
HMP_2012__SRS015072__bin.1	HMP_2012	SRS015072	1	7045	Lactobacillus crispatus	Species	95	95	64051	1228351	36.64	28040	58.62	0	0	Homo sapiens	Vagina	mid_vagina	28	Adult	Yes	USA	No	d__Bacteria;p__Firmicutes;c__Bacilli;o__Lactobacillales;f__Lactobacillaceae;g__Lactobacillus;s__Lactobacillus crispatus	GCF_002088015.1	95	d__Bacteria;p__Firmicutes;c__Bacilli;o__Lactobacillales;f__Lactobacillaceae;g__Lactobacillus;s__Lactobacillus crispatus	97.83	0.79	GCF_002088015.1	95	d__Bacteria;p__Firmicutes;c__Bacilli;o__Lactobacillales;f__Lactobacillaceae;g__Lactobacillus;s__Lactobacillus crispatus	97.83	0.79	d__Bacteria;p__Firmicutes;c__Bacilli;o__Lactobacillales;f__Lactobacillaceae;g__Lactobacillus;s__	taxonomic classification defined by topology and ANI	topological placement and ANI have congruent species assignments	GCF_000615285.1, s__Lactobacillus kitasatonis, 95.0, 82.57, 0.54; GCF_002706375.1, s__Lactobacillus amylovorus, 95.0, 82.11, 0.58; GCF_000614735.1, s__Lactobacillus gallinarum, 95.0, 82.02, 0.57; GCF_000160855.1, s__Lactobacillus helveticus, 95.0, 81.94, 0.52; GCF_001436305.1, s__Lactobacillus ultunensis, 95.0, 81.94, 0.5; GCF_001591845.1, s__Lactobacillus acidophilus, 95.0, 81.9, 0.53; GCF_90010…	50.35	11	N/A	N/A
HMP_2012__SRS016516__bin.2	HMP_2012	SRS016516	2	7045	Lactobacillus crispatus	Species	50	50	131746	1050471	37.19	36595	54.55	0	0	Homo sapiens	Vagina	posterior_fornix	23	Adult	Yes	USA	No	d__Bacteria;p__Firmicutes;c__Bacilli;o__Lactobacillales;f__Lactobacillaceae;g__Lactobacillus;s__Lactobacillus crispatus	GCF_002088015.1	95	d__Bacteria;p__Firmicutes;c__Bacilli;o__Lactobacillales;f__Lactobacillaceae;g__Lactobacillus;s__Lactobacillus crispatus	97.22	0.79	GCF_002088015.1	95	d__Bacteria;p__Firmicutes;c__Bacilli;o__Lactobacillales;f__Lactobacillaceae;g__Lactobacillus;s__Lactobacillus crispatus	97.22	0.79	d__Bacteria;p__Firmicutes;c__Bacilli;o__Lactobacillales;f__Lactobacillaceae;g__Lactobacillus;s__	taxonomic classification defined by topology and ANI	topological placement and ANI have congruent species assignments	GCF_000615285.1, s__Lactobacillus kitasatonis, 95.0, 83.69, 0.61; GCF_002706375.1, s__Lactobacillus amylovorus, 95.0, 83.25, 0.61; GCF_000614735.1, s__Lactobacillus gallinarum, 95.0, 83.08, 0.62; GCF_000160855.1, s__Lactobacillus helveticus, 95.0, 82.69, 0.56; GCF_001591845.1, s__Lactobacillus acidophilus, 95.0, 82.54, 0.58; GCF_900103655.1, s__Lactobacillus kefiranofaciens, 95.0, 82.08, 0.6; GCF…	66.69	11	N/A	N/A
HMP_2012__SRS017520__bin.2	HMP_2012	SRS017520	2	7045	Lactobacillus crispatus	Species	93	93	58050	1223861	37.67	18578	60.71	0.09	0	Homo sapiens	Vagina	posterior_fornix	26	Adult	Yes	USA	No	d__Bacteria;p__Firmicutes;c__Bacilli;o__Lactobacillales;f__Lactobacillaceae;g__Lactobacillus;s__Lactobacillus crispatus	GCF_002088015.1	95	d__Bacteria;p__Firmicutes;c__Bacilli;o__Lactobacillales;f__Lactobacillaceae;g__Lactobacillus;s__Lactobacillus crispatus	97.67	0.86	GCF_002088015.1	95	d__Bacteria;p__Firmicutes;c__Bacilli;o__Lactobacillales;f__Lactobacillaceae;g__Lactobacillus;s__Lactobacillus crispatus	97.67	0.86	d__Bacteria;p__Firmicutes;c__Bacilli;o__Lactobacillales;f__Lactobacillaceae;g__Lactobacillus;s__	taxonomic classification defined by topology and ANI	topological placement and ANI have congruent species assignments	GCF_000615285.1, s__Lactobacillus kitasatonis, 95.0, 83.64, 0.63; GCF_000614735.1, s__Lactobacillus gallinarum, 95.0, 83.43, 0.62; GCF_002706375.1, s__Lactobacillus amylovorus, 95.0, 83.0, 0.67; GCF_000160855.1, s__Lactobacillus helveticus, 95.0, 82.44, 0.6; GCF_001436305.1, s__Lactobacillus ultunensis, 95.0, 82.44, 0.58; GCF_900103655.1, s__Lactobacillus kefiranofaciens, 95.0, 82.04, 0.62; GCF_0…	55.39	11	N/A	N/A
HMP_2012__SRS018769__bin.1	HMP_2012	SRS018769	1	7045	Lactobacillus crispatus	Species	72	72	86276	1137140	36.3	29239	55.17	0	0	Homo sapiens	Vagina	posterior_fornix	21	Adult	Yes	USA	No	d__Bacteria;p__Firmicutes;c__Bacilli;o__Lactobacillales;f__Lactobacillaceae;g__Lactobacillus;s__Lactobacillus crispatus	GCF_002088015.1	95	d__Bacteria;p__Firmicutes;c__Bacilli;o__Lactobacillales;f__Lactobacillaceae;g__Lactobacillus;s__Lactobacillus crispatus	97.98	0.77	GCF_002088015.1	95	d__Bacteria;p__Firmicutes;c__Bacilli;o__Lactobacillales;f__Lactobacillaceae;g__Lactobacillus;s__Lactobacillus crispatus	97.98	0.77	d__Bacteria;p__Firmicutes;c__Bacilli;o__Lactobacillales;f__Lactobacillaceae;g__Lactobacillus;s__	taxonomic classification defined by topology and ANI	topological placement and ANI have congruent species assignments	GCF_000615285.1, s__Lactobacillus kitasatonis, 95.0, 82.15, 0.53; GCF_000614735.1, s__Lactobacillus gallinarum, 95.0, 82.08, 0.52; GCF_000160855.1, s__Lactobacillus helveticus, 95.0, 81.86, 0.5; GCF_002706375.1, s__Lactobacillus amylovorus, 95.0, 81.67, 0.54; GCF_001591845.1, s__Lactobacillus acidophilus, 95.0, 81.4, 0.52; GCF_001436305.1, s__Lactobacillus ultunensis, 95.0, 81.32, 0.5; GCF_900103…	47.89	11	N/A	N/A
HMP_2012__SRS019600__bin.1	HMP_2012	SRS019600	1	7045	Lactobacillus crispatus	Species	63	63	70509	973121	37.46	20620	53.66	0	0	Homo sapiens	Vagina	posterior_fornix	21	Adult	Yes	USA	No	d__Bacteria;p__Firmicutes;c__Bacilli;o__Lactobacillales;f__Lactobacillaceae;g__Lactobacillus;s__Lactobacillus crispatus	GCF_002088015.1	95	d__Bacteria;p__Firmicutes;c__Bacilli;o__Lactobacillales;f__Lactobacillaceae;g__Lactobacillus;s__Lactobacillus crispatus	98	0.88	GCF_002088015.1	95	d__Bacteria;p__Firmicutes;c__Bacilli;o__Lactobacillales;f__Lactobacillaceae;g__Lactobacillus;s__Lactobacillus crispatus	98	0.88	d__Bacteria;p__Firmicutes;c__Bacilli;o__Lactobacillales;f__Lactobacillaceae;g__Lactobacillus;s__	taxonomic classification defined by topology and ANI	topological placement and ANI have congruent species assignments	GCF_000615285.1, s__Lactobacillus kitasatonis, 95.0, 83.45, 0.66; GCF_002706375.1, s__Lactobacillus amylovorus, 95.0, 83.07, 0.71; GCF_000614735.1, s__Lactobacillus gallinarum, 95.0, 82.97, 0.64; GCF_000160855.1, s__Lactobacillus helveticus, 95.0, 82.49, 0.63; GCF_001436305.1, s__Lactobacillus ultunensis, 95.0, 82.05, 0.66; GCF_001591845.1, s__Lactobacillus acidophilus, 95.0, 81.85, 0.67; GCF_900…	46.24	11	N/A	N/A
HMP_2012__SRS021969__bin.1	HMP_2012	SRS021969	1	7045	Lactobacillus crispatus	Species	86	86	33478	1047734	37.38	15782	50.97	0.09	0	Homo sapiens	Vagina	posterior_fornix	27	Adult	Yes	USA	No	d__Bacteria;p__Firmicutes;c__Bacilli;o__Lactobacillales;f__Lactobacillaceae;g__Lactobacillus;s__Lactobacillus crispatus	GCF_002088015.1	95	d__Bacteria;p__Firmicutes;c__Bacilli;o__Lactobacillales;f__Lactobacillaceae;g__Lactobacillus;s__Lactobacillus crispatus	97.35	0.9	GCF_002088015.1	95	d__Bacteria;p__Firmicutes;c__Bacilli;o__Lactobacillales;f__Lactobacillaceae;g__Lactobacillus;s__Lactobacillus crispatus	97.35	0.9	d__Bacteria;p__Firmicutes;c__Bacilli;o__Lactobacillales;f__Lactobacillaceae;g__Lactobacillus;s__	taxonomic classification defined by topology and ANI	topological placement and ANI have congruent species assignments	GCF_000615285.1, s__Lactobacillus kitasatonis, 95.0, 83.31, 0.62; GCF_002706375.1, s__Lactobacillus amylovorus, 95.0, 83.09, 0.67; GCF_000614735.1, s__Lactobacillus gallinarum, 95.0, 82.98, 0.63; GCF_000160855.1, s__Lactobacillus helveticus, 95.0, 82.21, 0.61; GCF_001436305.1, s__Lactobacillus ultunensis, 95.0, 81.86, 0.6; GCF_001591845.1, s__Lactobacillus acidophilus, 95.0, 81.79, 0.61; GCF_9001…	49.59	11	N/A	N/A
HMP_2012__SRS022158__bin.1	HMP_2012	SRS022158	1	7045	Lactobacillus crispatus	Species	95	95	52301	1327386	36.51	30185	68.97	0	0	Homo sapiens	Vagina	posterior_fornix	27	Adult	Yes	USA	No	d__Bacteria;p__Firmicutes;c__Bacilli;o__Lactobacillales;f__Lactobacillaceae;g__Lactobacillus;s__Lactobacillus crispatus	GCF_002088015.1	95	d__Bacteria;p__Firmicutes;c__Bacilli;o__Lactobacillales;f__Lactobacillaceae;g__Lactobacillus;s__Lactobacillus crispatus	97.72	0.82	GCF_002088015.1	95	d__Bacteria;p__Firmicutes;c__Bacilli;o__Lactobacillales;f__Lactobacillaceae;g__Lactobacillus;s__Lactobacillus crispatus	97.72	0.82	d__Bacteria;p__Firmicutes;c__Bacilli;o__Lactobacillales;f__Lactobacillaceae;g__Lactobacillus;s__	taxonomic classification defined by topology and ANI	topological placement and ANI have congruent species assignments	GCF_000615285.1, s__Lactobacillus kitasatonis, 95.0, 82.49, 0.55; GCF_002706375.1, s__Lactobacillus amylovorus, 95.0, 81.98, 0.57; GCF_000614735.1, s__Lactobacillus gallinarum, 95.0, 81.89, 0.58; GCF_001436305.1, s__Lactobacillus ultunensis, 95.0, 81.71, 0.55; GCF_000160855.1, s__Lactobacillus helveticus, 95.0, 81.69, 0.54; GCF_001591845.1, s__Lactobacillus acidophilus, 95.0, 81.56, 0.54; GCF_900…	57.81	11	N/A	N/A
HMP_2012__SRS051505__bin.2	HMP_2012	SRS051505	2	7045	Lactobacillus crispatus	Species	272	272	69176	2257920	36.69	13655	97.08	2.78	12.5	Homo sapiens	Vagina	posterior_fornix	19	School age	Yes	USA	No	d__Bacteria;p__Firmicutes;c__Bacilli;o__Lactobacillales;f__Lactobacillaceae;g__Lactobacillus;s__Lactobacillus crispatus	GCF_002088015.1	95	d__Bacteria;p__Firmicutes;c__Bacilli;o__Lactobacillales;f__Lactobacillaceae;g__Lactobacillus;s__Lactobacillus crispatus	97.65	0.74	GCF_002088015.1	95	d__Bacteria;p__Firmicutes;c__Bacilli;o__Lactobacillales;f__Lactobacillaceae;g__Lactobacillus;s__Lactobacillus crispatus	97.65	0.74	d__Bacteria;p__Firmicutes;c__Bacilli;o__Lactobacillales;f__Lactobacillaceae;g__Lactobacillus;s__	taxonomic classification defined by topology and ANI	topological placement and ANI have congruent species assignments	GCF_000615285.1, s__Lactobacillus kitasatonis, 95.0, 82.86, 0.54; GCF_000614735.1, s__Lactobacillus gallinarum, 95.0, 82.76, 0.53; GCF_002706375.1, s__Lactobacillus amylovorus, 95.0, 82.7, 0.55; GCF_000160855.1, s__Lactobacillus helveticus, 95.0, 82.25, 0.5; GCF_001436305.1, s__Lactobacillus ultunensis, 95.0, 81.87, 0.52; GCF_001591845.1, s__Lactobacillus acidophilus, 95.0, 81.86, 0.51; GCF_90010…	88.66	11	N/A	N/A
HMP_2012__SRS065347__bin.3	HMP_2012	SRS065347	3	7045	Lactobacillus crispatus	Species	88	88	61734	1181472	37.3	19232	57.54	0	0	Homo sapiens	Vagina	posterior_fornix	28	Adult	Yes	USA	No	d__Bacteria;p__Firmicutes;c__Bacilli;o__Lactobacillales;f__Lactobacillaceae;g__Lactobacillus;s__Lactobacillus crispatus	GCF_002088015.1	95	d__Bacteria;p__Firmicutes;c__Bacilli;o__Lactobacillales;f__Lactobacillaceae;g__Lactobacillus;s__Lactobacillus crispatus	97.58	0.84	GCF_002088015.1	95	d__Bacteria;p__Firmicutes;c__Bacilli;o__Lactobacillales;f__Lactobacillaceae;g__Lactobacillus;s__Lactobacillus crispatus	97.58	0.84	d__Bacteria;p__Firmicutes;c__Bacilli;o__Lactobacillales;f__Lactobacillaceae;g__Lactobacillus;s__	taxonomic classification defined by topology and ANI	topological placement and ANI have congruent species assignments	GCF_000615285.1, s__Lactobacillus kitasatonis, 95.0, 83.24, 0.59; GCF_002706375.1, s__Lactobacillus amylovorus, 95.0, 82.75, 0.6; GCF_000614735.1, s__Lactobacillus gallinarum, 95.0, 82.7, 0.57; GCF_000160855.1, s__Lactobacillus helveticus, 95.0, 82.18, 0.55; GCF_001436305.1, s__Lactobacillus ultunensis, 95.0, 81.87, 0.55; GCF_001591845.1, s__Lactobacillus acidophilus, 95.0, 81.71, 0.56; GCF_90010…	46.89	11	N/A	N/A
Footnotes:
† Selected from metagenomes analyzed by Pasolli et al., Cell, 2019
MAG = metagenome-assembled genome

## Sheet: Table S18
Table S18. NCBI Lactobacillus crispatus genomes
NCBI Genome ID*	NCBI Taxonomy	NCBI Strain Name	GTDB-tk Classification	Taxonomic Level	Total Number of Contigs	Number of Contigs (>= 500)	Largest Contig	Total Length	GC (%)	N50	Completeness	Contamination	Strain Heterogeneity	Host	Isolation Source	Country	Latitude and Longitude	Collection Date	Collected By	NCBI Taxonomy ID	NCBI Taxonomy Lineage	NCBI Taxonomy ID Lineage	Biosample	Bioproject	Level of Assembly	Replicons	WGS	CDS	Release Date	Assembly FTP URL	Keywords	dbxrefs	Genbank Source Metadata (JSON Format)	Genbank Reference Metadata (JSON Format)	Alternative Names (NCBI Taxdump)	GTDB-tk Lineage	FastANI Reference	FastANI Reference Radius	FastANI Taxonomy	FastANI ANI	FastANI AF	Closest Placement Reference	Closest Placement Radius	Closest Placement Taxonomy	Closest Placement ANI	Closest Placement AF	pplacer Taxonomy	Classification Method	Note
GCF_000160515.1	Lactobacillus crispatus	JV-V01	Lactobacillus crispatus	Species	86	49	397962	2211592	36.9	150835	99.03	0.09	0	Homo sapiens	biological product [ENVO:02000043]	N/A	N/A	N/A	N/A	491076	cellular organisms; Bacteria; Terrabacteria group; Firmicutes; Bacilli; Lactobacillales; Lactobacillaceae; Lactobacillus; Lactobacillus crispatus; Lactobacillus crispatus JV-V01	131567 2 1783272 1239 91061 186826 33958 1578 47770 491076	SAMN00002229	PRJNA30641	Scaffold		ACKR01	1979	2009-04-27T00:00:00Z	ftp://ftp.ncbi.nlm.nih.gov/genomes/all/GCF/000/160/515/GCF_000160515.1_ASM16051v1	WGS;RefSeq	BioProject:PRJNA224116;BioSample:SAMN00002229;Assembly:GCF_000160515.1	{'mol_type': ['genomic DNA'], 'strain': ['JV-V01'], 'isolation_source': ['biological product [ENVO:02000043]'], 'db_xref': ['taxon:491076'], 'host': ['Homo sapiens'], 'organism': ['Lactobacillus crispatus JV-V01']}	{'journal': 'Submitted (06-APR-2009) Human Genome Sequencing Center, Baylor College of Medicine, One Baylor Plaza, Houston, TX 77030, USA', 'title': 'Direct Submission', 'pubmed_id': '', 'authors': 'Qin,X., Bachman,B., Battles,P., Bell,A., Bess,C., Bickham,C., Chaboub,L., Chen,D., Coyle,M., Deiros,D.R., Dinh,H., Forbes,L., Fowler,G., Francisco,L., Fu,Q., Gubbala,S., Hale,W., Han,Y., Hemphill,L., …	['Lactobacillus crispatus strain JV-V01;equivalent_name', 'Lactobacillus crispatus str. JV-V01;equivalent_name']	d__Bacteria;p__Firmicutes;c__Bacilli;o__Lactobacillales;f__Lactobacillaceae;g__Lactobacillus;s__Lactobacillus crispatus	GCF_002088015.1	95	d__Bacteria;p__Firmicutes;c__Bacilli;o__Lactobacillales;f__Lactobacillaceae;g__Lactobacillus;s__Lactobacillus crispatus	97.56	0.83	GCF_002088015.1	95	d__Bacteria;p__Firmicutes;c__Bacilli;o__Lactobacillales;f__Lactobacillaceae;g__Lactobacillus;s__Lactobacillus crispatus	97.56	0.83	d__Bacteria;p__Firmicutes;c__Bacilli;o__Lactobacillales;f__Lactobacillaceae;g__Lactobacillus;s__	taxonomic classification defined by topology and ANI	topological placement and ANI have congruent species assignments
GCF_000161915.2	Lactobacillus crispatus	MV-1A-US	Lactobacillus crispatus	Species	7	7	827985	2252504	36.84	431221	98.38	0.09	0	Homo sapiens	biological product [ENVO:02000043]	N/A	N/A	N/A	N/A	575596	cellular organisms; Bacteria; Terrabacteria group; Firmicutes; Bacilli; Lactobacillales; Lactobacillaceae; Lactobacillus; Lactobacillus crispatus; Lactobacillus crispatus MV-1A-US	131567 2 1783272 1239 91061 186826 33958 1578 47770 575596	SAMN02463726	PRJNA37951	Scaffold		ACOG02	2154	2009-08-24T00:00:00Z	ftp://ftp.ncbi.nlm.nih.gov/genomes/all/GCF/000/161/915/GCF_000161915.2_Lacto_cris_MV-1A-US_V2	WGS;HIGH_QUALITY_DRAFT;RefSeq	BioProject:PRJNA224116;BioSample:SAMN02463726;Assembly:GCF_000161915.2	{'mol_type': ['genomic DNA'], 'strain': ['MV-1A-US'], 'isolation_source': ['biological product [ENVO:02000043]'], 'db_xref': ['HMP:507', 'taxon:575596'], 'host': ['Homo sapiens'], 'organism': ['Lactobacillus crispatus MV-1A-US']}	{'journal': 'Unpublished', 'title': 'The Genome Sequence of Lactobacillus crispatus MV-1A-US', 'pubmed_id': '', 'authors': 'Earl,A., Ward,D., Feldgarden,M., Gevers,D., Liu,Y., Xu,Q., Young,S.K., Zeng,Q., Gargeya,S., Fitzgerald,M., Haas,B., Abouelleil,A., Alvarado,L., Arachchi,H.M., Berlin,A., Brown,A., Chapman,S.B., Chen,Z., Dunbar,C., Freedman,E., Gearin,G., Goldberg,J., Griggs,A., Gujja,S., Hei…	['Lactobacillus crispatus strain MV-1A-US;equivalent_name', 'Lactobacillus crispatus str. MV-1A-US;equivalent_name']	d__Bacteria;p__Firmicutes;c__Bacilli;o__Lactobacillales;f__Lactobacillaceae;g__Lactobacillus;s__Lactobacillus crispatus	GCF_002088015.1	95	d__Bacteria;p__Firmicutes;c__Bacilli;o__Lactobacillales;f__Lactobacillaceae;g__Lactobacillus;s__Lactobacillus crispatus	97.43	0.87	GCF_002088015.1	95	d__Bacteria;p__Firmicutes;c__Bacilli;o__Lactobacillales;f__Lactobacillaceae;g__Lactobacillus;s__Lactobacillus crispatus	97.43	0.87	d__Bacteria;p__Firmicutes;c__Bacilli;o__Lactobacillales;f__Lactobacillaceae;g__Lactobacillus;s__	taxonomic classification defined by topology and ANI	topological placement and ANI have congruent species assignments
GCF_000162255.1	Lactobacillus crispatus	125-2-CHN	Lactobacillus crispatus	Species	30	30	1175606	2305246	36.68	1175606	99.03	0.09	0	Homo sapiens	biological product [ENVO:02000043]	N/A	N/A	N/A	N/A	575595	cellular organisms; Bacteria; Terrabacteria group; Firmicutes; Bacilli; Lactobacillales; Lactobacillaceae; Lactobacillus; Lactobacillus crispatus; Lactobacillus crispatus 125-2-CHN	131567 2 1783272 1239 91061 186826 33958 1578 47770 575595	SAMN02463740	PRJNA38361	Scaffold		ACPV01	2024	2009-08-24T00:00:00Z	ftp://ftp.ncbi.nlm.nih.gov/genomes/all/GCF/000/162/255/GCF_000162255.1_ASM16225v1	WGS;RefSeq	BioProject:PRJNA224116;BioSample:SAMN02463740;Assembly:GCF_000162255.1	{'mol_type': ['genomic DNA'], 'strain': ['125-2-CHN'], 'isolation_source': ['biological product [ENVO:02000043]'], 'db_xref': ['taxon:575595'], 'host': ['Homo sapiens'], 'organism': ['Lactobacillus crispatus 125-2-CHN']}	{'journal': 'Unpublished', 'title': 'The Genome Sequence of Lactobacillus crispatus strain 125-2-CHN', 'pubmed_id': '', 'authors': 'Ward,D., Young,S.K., Zeng,Q., Koehrsen,M., Alvarado,L., Berlin,A., Borenstein,D., Chen,Z., Engels,R., Freedman,E., Gellesch,M., Goldberg,J., Griggs,A., Gujja,S., Heiman,D., Hepburn,T., Howarth,C., Jen,D., Larson,L., Lewis,B., Mehta,T., Park,D., Pearson,M., Roberts,A.…	['Lactobacillus crispatus str. 125-2-CHN;equivalent_name', 'Lactobacillus crispatus strain 125-2-CHN;equivalent_name']	d__Bacteria;p__Firmicutes;c__Bacilli;o__Lactobacillales;f__Lactobacillaceae;g__Lactobacillus;s__Lactobacillus crispatus	GCF_002088015.1	95	d__Bacteria;p__Firmicutes;c__Bacilli;o__Lactobacillales;f__Lactobacillaceae;g__Lactobacillus;s__Lactobacillus crispatus	97.49	0.89	GCF_002088015.1	95	d__Bacteria;p__Firmicutes;c__Bacilli;o__Lactobacillales;f__Lactobacillaceae;g__Lactobacillus;s__Lactobacillus crispatus	97.49	0.89	d__Bacteria;p__Firmicutes;c__Bacilli;o__Lactobacillales;f__Lactobacillaceae;g__Lactobacillus;s__	taxonomic classification defined by topology and ANI	topological placement and ANI have congruent species assignments
GCF_000162315.1	Lactobacillus crispatus	MV-3A-US	Lactobacillus crispatus	Species	76	76	374877	2437083	36.73	208681	98.38	0.74	0	Homo sapiens	biological product [ENVO:02000043]	N/A	N/A	N/A	N/A	575597	cellular organisms; Bacteria; Terrabacteria group; Firmicutes; Bacilli; Lactobacillales; Lactobacillaceae; Lactobacillus; Lactobacillus crispatus; Lactobacillus crispatus MV-3A-US	131567 2 1783272 1239 91061 186826 33958 1578 47770 575597	SAMN02463743	PRJNA38513	Scaffold		ACQC01	2232	2009-10-01T00:00:00Z	ftp://ftp.ncbi.nlm.nih.gov/genomes/all/GCF/000/162/315/GCF_000162315.1_ASM16231v1	WGS;RefSeq	BioProject:PRJNA224116;BioSample:SAMN02463743;Assembly:GCF_000162315.1	{'mol_type': ['genomic DNA'], 'strain': ['MV-3A-US'], 'isolation_source': ['biological product [ENVO:02000043]'], 'db_xref': ['taxon:575597'], 'host': ['Homo sapiens'], 'organism': ['Lactobacillus crispatus MV-3A-US']}	{'journal': 'Unpublished', 'title': 'The Genome Sequence of Lactobacillus crispatus strain MV-3A-US', 'pubmed_id': '', 'authors': 'Ward,D., Feldgarden,M., Earl,A., Young,S.K., Zeng,Q., Koehrsen,M., Alvarado,L., Berlin,A., Bochicchio,J., Borenstein,D., Chapman,S.B., Chen,Z., Engels,R., Freedman,E., Gellesch,M., Goldberg,J., Griggs,A., Gujja,S., Heilman,E., Heiman,D., Hepburn,T., Howarth,C., Jen,D.…	['Lactobacillus crispatus strain MV-3A-US;equivalent_name', 'Lactobacillus crispatus str. MV-3A-US;equivalent_name']	d__Bacteria;p__Firmicutes;c__Bacilli;o__Lactobacillales;f__Lactobacillaceae;g__Lactobacillus;s__Lactobacillus crispatus	GCF_002088015.1	95	d__Bacteria;p__Firmicutes;c__Bacilli;o__Lactobacillales;f__Lactobacillaceae;g__Lactobacillus;s__Lactobacillus crispatus	97.59	0.88	GCF_002088015.1	95	d__Bacteria;p__Firmicutes;c__Bacilli;o__Lactobacillales;f__Lactobacillaceae;g__Lactobacillus;s__Lactobacillus crispatus	97.59	0.88	d__Bacteria;p__Firmicutes;c__Bacilli;o__Lactobacillales;f__Lactobacillaceae;g__Lactobacillus;s__	taxonomic classification defined by topology and ANI	topological placement and ANI have congruent species assignments
GCF_000165885.1	Lactobacillus crispatus	CTV-05	Lactobacillus crispatus	Species	25	25	477166	2364583	37.06	179853	88.43	0	0	Homo sapiens	biological product [ENVO:02000043]	N/A	N/A	N/A	N/A	440496	cellular organisms; Bacteria; Terrabacteria group; Firmicutes; Bacilli; Lactobacillales; Lactobacillaceae; Lactobacillus; Lactobacillus crispatus; Lactobacillus crispatus CTV-05	131567 2 1783272 1239 91061 186826 33958 1578 47770 440496	SAMN02463723	PRJNA36325	Scaffold		ADML01	2076	2010-10-29T00:00:00Z	ftp://ftp.ncbi.nlm.nih.gov/genomes/all/GCF/000/165/885/GCF_000165885.1_ASM16588v1	WGS;RefSeq	BioProject:PRJNA224116;BioSample:SAMN02463723;Assembly:GCF_000165885.1	{'mol_type': ['genomic DNA'], 'strain': ['CTV-05'], 'isolation_source': ['biological product [ENVO:02000043]'], 'db_xref': ['taxon:440496'], 'host': ['Homo sapiens'], 'organism': ['Lactobacillus crispatus CTV-05']}	{'journal': 'Unpublished', 'title': 'The Genome Sequence of Lactobacillus crispatus strain CTV-05', 'pubmed_id': '', 'authors': 'Ward,D., Xu,Q., Earl,A., Liu,Y., Feldgarden,M., Gevers,D., Young,S.K., Zeng,Q., Koehrsen,M., Alvarado,L., Berlin,A., Borenstein,D., Chapman,S.B., Chen,Z., Engels,R., Freedman,E., Gellesch,M., Goldberg,J., Griggs,A., Gujja,S., Heilman,E.R., Heiman,D., Howarth,C., Jen,D.,…	['Lactobacillus crispatus strain CTV-05;equivalent_name', 'Lactobacillus crispatus str. CTV-05;equivalent_name']	d__Bacteria;p__Firmicutes;c__Bacilli;o__Lactobacillales;f__Lactobacillaceae;g__Lactobacillus;s__Lactobacillus crispatus	GCF_002088015.1	95	d__Bacteria;p__Firmicutes;c__Bacilli;o__Lactobacillales;f__Lactobacillaceae;g__Lactobacillus;s__Lactobacillus crispatus	97.11	0.79	GCF_002088015.1	95	d__Bacteria;p__Firmicutes;c__Bacilli;o__Lactobacillales;f__Lactobacillaceae;g__Lactobacillus;s__Lactobacillus crispatus	97.11	0.79	d__Bacteria;p__Firmicutes;c__Bacilli;o__Lactobacillales;f__Lactobacillaceae;g__Lactobacillus;s__	taxonomic classification defined by topology and ANI	topological placement and ANI have congruent species assignments
GCF_000176975.2	Lactobacillus crispatus	SJ-3C-US	Lactobacillus crispatus	Species	70	70	374116	2165034	36.75	273285	99.03	0.09	0	Homo sapiens	biological product [ENVO:02000043]	N/A	N/A	N/A	N/A	575598	cellular organisms; Bacteria; Terrabacteria group; Firmicutes; Bacilli; Lactobacillales; Lactobacillaceae; Lactobacillus; Lactobacillus crispatus; Lactobacillus crispatus SJ-3C-US	131567 2 1783272 1239 91061 186826 33958 1578 47770 575598	SAMN02463837	PRJNA42533	Scaffold		ADDT01	1952	2010-07-08T00:00:00Z	ftp://ftp.ncbi.nlm.nih.gov/genomes/all/GCF/000/176/975/GCF_000176975.2_ASM17697v2	WGS;HIGH_QUALITY_DRAFT;RefSeq	BioProject:PRJNA224116;BioSample:SAMN02463837;Assembly:GCF_000176975.2	{'mol_type': ['genomic DNA'], 'strain': ['SJ-3C-US'], 'isolation_source': ['biological product [ENVO:02000043]'], 'db_xref': ['taxon:575598'], 'host': ['Homo sapiens'], 'organism': ['Lactobacillus crispatus SJ-3C-US']}	{'journal': 'Unpublished', 'title': 'The Genome Sequence of Lactobacillus crispatus strain SJ-3C-US', 'pubmed_id': '', 'authors': 'Ward,D., Earl,A., Feldgarden,M., Gevers,D., Young,S.K., Zeng,Q., Koehrsen,M., Alvarado,L., Berlin,A., Bochicchio,J., Borenstein,D., Chapman,S.B., Chen,Z., Engels,R., Freedman,E., Gellesch,M., Goldberg,J., Griggs,A., Gujja,S., Heilman,E., Heiman,D., Hepburn,T., Howarth…	['Lactobacillus crispatus strain SJ-3C-US;equivalent_name', 'Lactobacillus crispatus str. SJ-3C-US;equivalent_name']	d__Bacteria;p__Firmicutes;c__Bacilli;o__Lactobacillales;f__Lactobacillaceae;g__Lactobacillus;s__Lactobacillus crispatus	GCF_002088015.1	95	d__Bacteria;p__Firmicutes;c__Bacilli;o__Lactobacillales;f__Lactobacillaceae;g__Lactobacillus;s__Lactobacillus crispatus	97.58	0.86	GCF_002088015.1	95	d__Bacteria;p__Firmicutes;c__Bacilli;o__Lactobacillales;f__Lactobacillaceae;g__Lactobacillus;s__Lactobacillus crispatus	97.58	0.86	d__Bacteria;p__Firmicutes;c__Bacilli;o__Lactobacillales;f__Lactobacillaceae;g__Lactobacillus;s__	taxonomic classification defined by topology and ANI	topological placement and ANI have congruent species assignments
GCF_000177575.1	Lactobacillus crispatus	214-1	Lactobacillus crispatus	Species	187	187	84442	2068805	36.87	22694	99.03	0.31	0	Homo sapiens	biological product [ENVO:02000043]	N/A	N/A	N/A	N/A	679188	cellular organisms; Bacteria; Terrabacteria group; Firmicutes; Bacilli; Lactobacillales; Lactobacillaceae; Lactobacillus; Lactobacillus crispatus; Lactobacillus crispatus 214-1	131567 2 1783272 1239 91061 186826 33958 1578 47770 679188	SAMN00003361	PRJNA40665	Contig		ADGR01	1963	2010-03-11T00:00:00Z	ftp://ftp.ncbi.nlm.nih.gov/genomes/all/GCF/000/177/575/GCF_000177575.1_ASM17757v1	WGS;RefSeq	BioProject:PRJNA224116;BioSample:SAMN00003361;Assembly:GCF_000177575.1	{'mol_type': ['genomic DNA'], 'strain': ['214-1'], 'isolation_source': ['biological product [ENVO:02000043]'], 'db_xref': ['taxon:679188'], 'host': ['Homo sapiens'], 'organism': ['Lactobacillus crispatus 214-1']}	{'journal': 'Submitted (30-DEC-2009) J. Craig Venter Institute, 9704 Medical Center Drive, Rockville, MD 20850, USA', 'title': 'Direct Submission', 'pubmed_id': '', 'authors': 'Madupu,R., Durkin,A.S., Torralba,M., Methe,B., Sutton,G.G., Strausberg,R.L. and Nelson,K.E.'}	['Lactobacillus crispatus str. 214-1;equivalent_name', 'Lactobacillus crispatus strain 214-1;equivalent_name']	d__Bacteria;p__Firmicutes;c__Bacilli;o__Lactobacillales;f__Lactobacillaceae;g__Lactobacillus;s__Lactobacillus crispatus	GCF_002088015.1	95	d__Bacteria;p__Firmicutes;c__Bacilli;o__Lactobacillales;f__Lactobacillaceae;g__Lactobacillus;s__Lactobacillus crispatus	97.62	0.81	GCF_002088015.1	95	d__Bacteria;p__Firmicutes;c__Bacilli;o__Lactobacillales;f__Lactobacillaceae;g__Lactobacillus;s__Lactobacillus crispatus	97.62	0.81	d__Bacteria;p__Firmicutes;c__Bacilli;o__Lactobacillales;f__Lactobacillaceae;g__Lactobacillus;s__	taxonomic classification defined by topology and ANI	topological placement and ANI have congruent species assignments
GCF_000301115.1	Lactobacillus crispatus	FB049-03	Lactobacillus crispatus	Species	5	5	639689	2459384	36.95	632608	98.38	0.09	0	Homo sapiens	biological product [ENVO:02000043]	N/A	N/A	N/A	N/A	883094	cellular organisms; Bacteria; Terrabacteria group; Firmicutes; Bacilli; Lactobacillales; Lactobacillaceae; Lactobacillus; Lactobacillus crispatus; Lactobacillus crispatus FB049-03	131567 2 1783272 1239 91061 186826 33958 1578 47770 883094	SAMN02463886	PRJNA52107	Scaffold		AGZF01	2214	2012-09-18T00:00:00Z	ftp://ftp.ncbi.nlm.nih.gov/genomes/all/GCF/000/301/115/GCF_000301115.1_Lact_cris_FB049-03_V1	WGS;HIGH_QUALITY_DRAFT;RefSeq	BioProject:PRJNA224116;BioSample:SAMN02463886;Assembly:GCF_000301115.1	{'mol_type': ['genomic DNA'], 'strain': ['FB049-03'], 'isolation_source': ['biological product [ENVO:02000043]'], 'db_xref': ['HMP:9250', 'taxon:883094'], 'host': ['Homo sapiens'], 'organism': ['Lactobacillus crispatus FB049-03']}	{'journal': 'Unpublished', 'title': 'The Genome Sequence of Lactobacillus crispatus FB049-03', 'pubmed_id': '', 'authors': 'Earl,A., Ward,D., Feldgarden,M., Gevers,D., Saerens,B., Vaneechoutte,M., Walker,B., Young,S.K., Zeng,Q., Gargeya,S., Fitzgerald,M., Haas,B., Abouelleil,A., Alvarado,L., Arachchi,H.M., Berlin,A.M., Chapman,S.B., Goldberg,J., Griggs,A., Gujja,S., Hansen,M., Howarth,C., Imamovi…	N/A	d__Bacteria;p__Firmicutes;c__Bacilli;o__Lactobacillales;f__Lactobacillaceae;g__Lactobacillus;s__Lactobacillus crispatus	GCF_002088015.1	95	d__Bacteria;p__Firmicutes;c__Bacilli;o__Lactobacillales;f__Lactobacillaceae;g__Lactobacillus;s__Lactobacillus crispatus	97.39	0.88	GCF_002088015.1	95	d__Bacteria;p__Firmicutes;c__Bacilli;o__Lactobacillales;f__Lactobacillaceae;g__Lactobacillus;s__Lactobacillus crispatus	97.39	0.88	d__Bacteria;p__Firmicutes;c__Bacilli;o__Lactobacillales;f__Lactobacillaceae;g__Lactobacillus;s__	taxonomic classification defined by topology and ANI	topological placement and ANI have congruent species assignments
GCF_000301135.1	Lactobacillus crispatus	FB077-07	Lactobacillus crispatus	Species	10	10	1424024	2699381	36.75	1424024	99.03	0.37	0	Homo sapiens	biological product [ENVO:02000043]	N/A	N/A	N/A	N/A	883092	cellular organisms; Bacteria; Terrabacteria group; Firmicutes; Bacilli; Lactobacillales; Lactobacillaceae; Lactobacillus; Lactobacillus crispatus; Lactobacillus crispatus FB077-07	131567 2 1783272 1239 91061 186826 33958 1578 47770 883092	SAMN02463885	PRJNA52105	Scaffold		AGZG01	2420	2012-09-18T00:00:00Z	ftp://ftp.ncbi.nlm.nih.gov/genomes/all/GCF/000/301/135/GCF_000301135.1_Lact_cris_FB077-07_V1	WGS;HIGH_QUALITY_DRAFT;RefSeq	BioProject:PRJNA224116;BioSample:SAMN02463885;Assembly:GCF_000301135.1	{'mol_type': ['genomic DNA'], 'strain': ['FB077-07'], 'isolation_source': ['biological product [ENVO:02000043]'], 'db_xref': ['HMP:9249', 'taxon:883092'], 'host': ['Homo sapiens'], 'organism': ['Lactobacillus crispatus FB077-07']}	{'journal': 'Unpublished', 'title': 'The Genome Sequence of Lactobacillus crispatus FB077-07', 'pubmed_id': '', 'authors': 'Earl,A., Ward,D., Feldgarden,M., Gevers,D., Saerens,B., Vaneechoutte,M., Walker,B., Young,S.K., Zeng,Q., Gargeya,S., Fitzgerald,M., Haas,B., Abouelleil,A., Alvarado,L., Arachchi,H.M., Berlin,A.M., Chapman,S.B., Goldberg,J., Griggs,A., Gujja,S., Hansen,M., Howarth,C., Imamovi…	N/A	d__Bacteria;p__Firmicutes;c__Bacilli;o__Lactobacillales;f__Lactobacillaceae;g__Lactobacillus;s__Lactobacillus crispatus	GCF_002088015.1	95	d__Bacteria;p__Firmicutes;c__Bacilli;o__Lactobacillales;f__Lactobacillaceae;g__Lactobacillus;s__Lactobacillus crispatus	97.46	0.88	GCF_002088015.1	95	d__Bacteria;p__Firmicutes;c__Bacilli;o__Lactobacillales;f__Lactobacillaceae;g__Lactobacillus;s__Lactobacillus crispatus	97.46	0.88	d__Bacteria;p__Firmicutes;c__Bacilli;o__Lactobacillales;f__Lactobacillaceae;g__Lactobacillus;s__	taxonomic classification defined by topology and ANI	topological placement and ANI have congruent species assignments
GCF_000466885.2	Lactobacillus crispatus	2029	Lactobacillus crispatus	Species	295	295	40750	2193123	36.89	9656	97	0.67	60	Homo sapiens	genital tract of a healthy woman	Russia	N/A	2011	N/A	1381118	cellular organisms; Bacteria; Terrabacteria group; Firmicutes; Bacilli; Lactobacillales; Lactobacillaceae; Lactobacillus; Lactobacillus crispatus; Lactobacillus crispatus 2029	131567 2 1783272 1239 91061 186826 33958 1578 47770 1381118	SAMN02298797	PRJNA213996	Contig		AVFH02	1753	2013-09-13T00:00:00Z	ftp://ftp.ncbi.nlm.nih.gov/genomes/all/GCF/000/466/885/GCF_000466885.2_ASM46688v2	WGS;RefSeq	BioProject:PRJNA224116;BioSample:SAMN02298797;Assembly:GCF_000466885.2	{'mol_type': ['genomic DNA'], 'strain': ['2029'], 'collection_date': ['2011'], 'country': ['Russia'], 'isolation_source': ['genital tract of a healthy woman'], 'db_xref': ['taxon:1381118'], 'host': ['Homo sapiens'], 'organism': ['Lactobacillus crispatus 2029'], 'culture_collection': ['VKM:2029']}	{'journal': 'Genome Announc 2 (1), e01221-13 (2014)', 'title': 'Draft Genome Sequence of Lactobacillus crispatus 2029', 'pubmed_id': '24558253', 'authors': 'Karlyshev,A.V., Melnikov,V.G., Khlebnikov,V.C. and Abramov,V.M.'}	N/A	d__Bacteria;p__Firmicutes;c__Bacilli;o__Lactobacillales;f__Lactobacillaceae;g__Lactobacillus;s__Lactobacillus crispatus	GCF_002088015.1	95	d__Bacteria;p__Firmicutes;c__Bacilli;o__Lactobacillales;f__Lactobacillaceae;g__Lactobacillus;s__Lactobacillus crispatus	97.45	0.8	GCF_002088015.1	95	d__Bacteria;p__Firmicutes;c__Bacilli;o__Lactobacillales;f__Lactobacillaceae;g__Lactobacillus;s__Lactobacillus crispatus	97.45	0.8	d__Bacteria;p__Firmicutes;c__Bacilli;o__Lactobacillales;f__Lactobacillaceae;g__Lactobacillus;s__	taxonomic classification defined by topology and ANI	topological placement and ANI have congruent species assignments
GCF_001541385.1	Lactobacillus crispatus	VMC3	Lactobacillus crispatus	Species	91	90	190564	2201063	36.55	66007	99.03	0	0	Homo sapiens	vaginal	USA: Virginia	N/A	2010	N/A	47770	cellular organisms; Bacteria; Terrabacteria group; Firmicutes; Bacilli; Lactobacillales; Lactobacillaceae; Lactobacillus; Lactobacillus crispatus	131567 2 1783272 1239 91061 186826 33958 1578 47770	SAMN03893601	PRJNA290636	Contig		LJGP01	1995	2016-01-26T00:00:00Z	ftp://ftp.ncbi.nlm.nih.gov/genomes/all/GCF/001/541/385/GCF_001541385.1_ASM154138v1	WGS;RefSeq	BioProject:PRJNA224116;BioSample:SAMN03893601;Assembly:GCF_001541385.1	{'mol_type': ['genomic DNA'], 'strain': ['VMC3'], 'collection_date': ['2010'], 'country': ['USA: Virginia'], 'isolation_source': ['vaginal'], 'db_xref': ['taxon:47770'], 'host': ['Homo sapiens'], 'organism': ['Lactobacillus crispatus']}	{'journal': 'Microbiology (Reading, Engl.) 162 (3), 466-475 (2016)', 'title': 'Comparison of Lactobacillus crispatus isolates from Lactobacillus-dominated vaginal microbiomes with isolates from microbiomes containing bacterial vaginosis-associated bacteria', 'pubmed_id': '26747455', 'authors': 'Abdelmaksoud,A.A., Koparde,V.N., Sheth,N.U., Serrano,M.G., Glascock,A.L., Fettweis,J.M., Strauss Iii,J.…	['"Eubacterium crispatum" Brygoo and Aladame 1953;authority', 'Eubacterium crispatum;synonym', 'Lactobacillus crispatus (Brygoo and Aladame 1953) Moore and Holdeman 1970 (Approved Lists) emend. Cato et al. 1983;authority']	d__Bacteria;p__Firmicutes;c__Bacilli;o__Lactobacillales;f__Lactobacillaceae;g__Lactobacillus;s__Lactobacillus crispatus	GCF_002088015.1	95	d__Bacteria;p__Firmicutes;c__Bacilli;o__Lactobacillales;f__Lactobacillaceae;g__Lactobacillus;s__Lactobacillus crispatus	97.52	0.86	GCF_002088015.1	95	d__Bacteria;p__Firmicutes;c__Bacilli;o__Lactobacillales;f__Lactobacillaceae;g__Lactobacillus;s__Lactobacillus crispatus	97.52	0.86	d__Bacteria;p__Firmicutes;c__Bacilli;o__Lactobacillales;f__Lactobacillaceae;g__Lactobacillus;s__	taxonomic classification defined by topology and ANI	topological placement and ANI have congruent species assignments
GCF_001541405.1	Lactobacillus crispatus	VMC4	Lactobacillus crispatus	Species	244	213	94177	2301407	36.78	25256	99.03	0.06	100	Homo sapiens	vaginal	USA: Virginia	N/A	2010	N/A	47770	cellular organisms; Bacteria; Terrabacteria group; Firmicutes; Bacilli; Lactobacillales; Lactobacillaceae; Lactobacillus; Lactobacillus crispatus	131567 2 1783272 1239 91061 186826 33958 1578 47770	SAMN03893602	PRJNA290636	Contig		LJGQ01	2244	2016-01-26T00:00:00Z	ftp://ftp.ncbi.nlm.nih.gov/genomes/all/GCF/001/541/405/GCF_001541405.1_ASM154140v1	WGS;RefSeq	BioProject:PRJNA224116;BioSample:SAMN03893602;Assembly:GCF_001541405.1	{'mol_type': ['genomic DNA'], 'strain': ['VMC4'], 'collection_date': ['2010'], 'country': ['USA: Virginia'], 'isolation_source': ['vaginal'], 'db_xref': ['taxon:47770'], 'host': ['Homo sapiens'], 'organism': ['Lactobacillus crispatus']}	{'journal': 'Microbiology (Reading, Engl.) 162 (3), 466-475 (2016)', 'title': 'Comparison of Lactobacillus crispatus isolates from Lactobacillus-dominated vaginal microbiomes with isolates from microbiomes containing bacterial vaginosis-associated bacteria', 'pubmed_id': '26747455', 'authors': 'Abdelmaksoud,A.A., Koparde,V.N., Sheth,N.U., Serrano,M.G., Glascock,A.L., Fettweis,J.M., Strauss Iii,J.…	['"Eubacterium crispatum" Brygoo and Aladame 1953;authority', 'Eubacterium crispatum;synonym', 'Lactobacillus crispatus (Brygoo and Aladame 1953) Moore and Holdeman 1970 (Approved Lists) emend. Cato et al. 1983;authority']	d__Bacteria;p__Firmicutes;c__Bacilli;o__Lactobacillales;f__Lactobacillaceae;g__Lactobacillus;s__Lactobacillus crispatus	GCF_002088015.1	95	d__Bacteria;p__Firmicutes;c__Bacilli;o__Lactobacillales;f__Lactobacillaceae;g__Lactobacillus;s__Lactobacillus crispatus	97.65	0.81	GCF_002088015.1	95	d__Bacteria;p__Firmicutes;c__Bacilli;o__Lactobacillales;f__Lactobacillaceae;g__Lactobacillus;s__Lactobacillus crispatus	97.65	0.81	d__Bacteria;p__Firmicutes;c__Bacilli;o__Lactobacillales;f__Lactobacillaceae;g__Lactobacillus;s__	taxonomic classification defined by topology and ANI	topological placement and ANI have congruent species assignments
GCF_001541505.1	Lactobacillus crispatus	VMC6	Lactobacillus crispatus	Species	253	226	113835	2333043	36.8	23819	99.68	2.27	5.56	Homo sapiens	vaginal	USA: Virginia	N/A	2010	N/A	47770	cellular organisms; Bacteria; Terrabacteria group; Firmicutes; Bacilli; Lactobacillales; Lactobacillaceae; Lactobacillus; Lactobacillus crispatus	131567 2 1783272 1239 91061 186826 33958 1578 47770	SAMN03893604	PRJNA290636	Contig		LJOL01	2195	2016-01-26T00:00:00Z	ftp://ftp.ncbi.nlm.nih.gov/genomes/all/GCF/001/541/505/GCF_001541505.1_ASM154150v1	WGS;RefSeq	BioProject:PRJNA224116;BioSample:SAMN03893604;Assembly:GCF_001541505.1	{'mol_type': ['genomic DNA'], 'strain': ['VMC6'], 'collection_date': ['2010'], 'country': ['USA: Virginia'], 'isolation_source': ['vaginal'], 'db_xref': ['taxon:47770'], 'host': ['Homo sapiens'], 'organism': ['Lactobacillus crispatus']}	{'journal': 'Microbiology (Reading, Engl.) 162 (3), 466-475 (2016)', 'title': 'Comparison of Lactobacillus crispatus isolates from Lactobacillus-dominated vaginal microbiomes with isolates from microbiomes containing bacterial vaginosis-associated bacteria', 'pubmed_id': '26747455', 'authors': 'Abdelmaksoud,A.A., Koparde,V.N., Sheth,N.U., Serrano,M.G., Glascock,A.L., Fettweis,J.M., Strauss Iii,J.…	['"Eubacterium crispatum" Brygoo and Aladame 1953;authority', 'Eubacterium crispatum;synonym', 'Lactobacillus crispatus (Brygoo and Aladame 1953) Moore and Holdeman 1970 (Approved Lists) emend. Cato et al. 1983;authority']	d__Bacteria;p__Firmicutes;c__Bacilli;o__Lactobacillales;f__Lactobacillaceae;g__Lactobacillus;s__Lactobacillus crispatus	GCF_002088015.1	95	d__Bacteria;p__Firmicutes;c__Bacilli;o__Lactobacillales;f__Lactobacillaceae;g__Lactobacillus;s__Lactobacillus crispatus	97.73	0.79	GCF_002088015.1	95	d__Bacteria;p__Firmicutes;c__Bacilli;o__Lactobacillales;f__Lactobacillaceae;g__Lactobacillus;s__Lactobacillus crispatus	97.73	0.79	d__Bacteria;p__Firmicutes;c__Bacilli;o__Lactobacillales;f__Lactobacillaceae;g__Lactobacillus;s__	taxonomic classification defined by topology and ANI	topological placement and ANI have congruent species assignments
GCF_001541515.1	Lactobacillus crispatus	VMC5	Lactobacillus crispatus	Species	259	230	90015	2230957	36.91	24683	99.03	0.44	66.67	Homo sapiens	vaginal	USA: Virginia	N/A	2010	N/A	47770	cellular organisms; Bacteria; Terrabacteria group; Firmicutes; Bacilli; Lactobacillales; Lactobacillaceae; Lactobacillus; Lactobacillus crispatus	131567 2 1783272 1239 91061 186826 33958 1578 47770	SAMN03893603	PRJNA290636	Scaffold		LJOK01	2146	2016-01-26T00:00:00Z	ftp://ftp.ncbi.nlm.nih.gov/genomes/all/GCF/001/541/515/GCF_001541515.1_ASM154151v1	WGS;RefSeq	BioProject:PRJNA224116;BioSample:SAMN03893603;Assembly:GCF_001541515.1	{'mol_type': ['genomic DNA'], 'strain': ['VMC5'], 'collection_date': ['2010'], 'country': ['USA: Virginia'], 'isolation_source': ['vaginal'], 'db_xref': ['taxon:47770'], 'host': ['Homo sapiens'], 'organism': ['Lactobacillus crispatus']}	{'journal': 'Microbiology (Reading, Engl.) 162 (3), 466-475 (2016)', 'title': 'Comparison of Lactobacillus crispatus isolates from Lactobacillus-dominated vaginal microbiomes with isolates from microbiomes containing bacterial vaginosis-associated bacteria', 'pubmed_id': '26747455', 'authors': 'Abdelmaksoud,A.A., Koparde,V.N., Sheth,N.U., Serrano,M.G., Glascock,A.L., Fettweis,J.M., Strauss Iii,J.…	['"Eubacterium crispatum" Brygoo and Aladame 1953;authority', 'Eubacterium crispatum;synonym', 'Lactobacillus crispatus (Brygoo and Aladame 1953) Moore and Holdeman 1970 (Approved Lists) emend. Cato et al. 1983;authority']	d__Bacteria;p__Firmicutes;c__Bacilli;o__Lactobacillales;f__Lactobacillaceae;g__Lactobacillus;s__Lactobacillus crispatus	GCF_002088015.1	95	d__Bacteria;p__Firmicutes;c__Bacilli;o__Lactobacillales;f__Lactobacillaceae;g__Lactobacillus;s__Lactobacillus crispatus	97.8	0.78	GCF_002088015.1	95	d__Bacteria;p__Firmicutes;c__Bacilli;o__Lactobacillales;f__Lactobacillaceae;g__Lactobacillus;s__Lactobacillus crispatus	97.8	0.78	d__Bacteria;p__Firmicutes;c__Bacilli;o__Lactobacillales;f__Lactobacillaceae;g__Lactobacillus;s__	taxonomic classification defined by topology and ANI	topological placement and ANI have congruent species assignments
GCF_001541535.1	Lactobacillus crispatus	VMC7	Lactobacillus crispatus	Species	247	227	110072	2093241	36.62	19960	99.03	0.54	0	Homo sapiens	vaginal	USA: Virginia	N/A	2009	N/A	47770	cellular organisms; Bacteria; Terrabacteria group; Firmicutes; Bacilli; Lactobacillales; Lactobacillaceae; Lactobacillus; Lactobacillus crispatus	131567 2 1783272 1239 91061 186826 33958 1578 47770	SAMN03893605	PRJNA290636	Contig		LJOM01	1952	2016-01-26T00:00:00Z	ftp://ftp.ncbi.nlm.nih.gov/genomes/all/GCF/001/541/535/GCF_001541535.1_ASM154153v1	WGS;RefSeq	BioProject:PRJNA224116;BioSample:SAMN03893605;Assembly:GCF_001541535.1	{'mol_type': ['genomic DNA'], 'strain': ['VMC7'], 'collection_date': ['2009'], 'country': ['USA: Virginia'], 'isolation_source': ['vaginal'], 'db_xref': ['taxon:47770'], 'host': ['Homo sapiens'], 'organism': ['Lactobacillus crispatus']}	{'journal': 'Microbiology (Reading, Engl.) 162 (3), 466-475 (2016)', 'title': 'Comparison of Lactobacillus crispatus isolates from Lactobacillus-dominated vaginal microbiomes with isolates from microbiomes containing bacterial vaginosis-associated bacteria', 'pubmed_id': '26747455', 'authors': 'Abdelmaksoud,A.A., Koparde,V.N., Sheth,N.U., Serrano,M.G., Glascock,A.L., Fettweis,J.M., Strauss Iii,J.…	['"Eubacterium crispatum" Brygoo and Aladame 1953;authority', 'Eubacterium crispatum;synonym', 'Lactobacillus crispatus (Brygoo and Aladame 1953) Moore and Holdeman 1970 (Approved Lists) emend. Cato et al. 1983;authority']	d__Bacteria;p__Firmicutes;c__Bacilli;o__Lactobacillales;f__Lactobacillaceae;g__Lactobacillus;s__Lactobacillus crispatus	GCF_002088015.1	95	d__Bacteria;p__Firmicutes;c__Bacilli;o__Lactobacillales;f__Lactobacillaceae;g__Lactobacillus;s__Lactobacillus crispatus	97.51	0.81	GCF_002088015.1	95	d__Bacteria;p__Firmicutes;c__Bacilli;o__Lactobacillales;f__Lactobacillaceae;g__Lactobacillus;s__Lactobacillus crispatus	97.51	0.81	d__Bacteria;p__Firmicutes;c__Bacilli;o__Lactobacillales;f__Lactobacillaceae;g__Lactobacillus;s__	taxonomic classification defined by topology and ANI	topological placement and ANI have congruent species assignments
GCF_001541585.1	Lactobacillus crispatus	VMC8	Lactobacillus crispatus	Species	255	239	111949	2325970	36.83	21801	99.03	2.77	0	Homo sapiens	vaginal	USA: Virginia	N/A	2010	N/A	47770	cellular organisms; Bacteria; Terrabacteria group; Firmicutes; Bacilli; Lactobacillales; Lactobacillaceae; Lactobacillus; Lactobacillus crispatus	131567 2 1783272 1239 91061 186826 33958 1578 47770	SAMN03893606	PRJNA290636	Contig		LJON01	2193	2016-01-26T00:00:00Z	ftp://ftp.ncbi.nlm.nih.gov/genomes/all/GCF/001/541/585/GCF_001541585.1_ASM154158v1	WGS;RefSeq	BioProject:PRJNA224116;BioSample:SAMN03893606;Assembly:GCF_001541585.1	{'mol_type': ['genomic DNA'], 'strain': ['VMC8'], 'collection_date': ['2010'], 'country': ['USA: Virginia'], 'isolation_source': ['vaginal'], 'db_xref': ['taxon:47770'], 'host': ['Homo sapiens'], 'organism': ['Lactobacillus crispatus']}	{'journal': 'Microbiology (Reading, Engl.) 162 (3), 466-475 (2016)', 'title': 'Comparison of Lactobacillus crispatus isolates from Lactobacillus-dominated vaginal microbiomes with isolates from microbiomes containing bacterial vaginosis-associated bacteria', 'pubmed_id': '26747455', 'authors': 'Abdelmaksoud,A.A., Koparde,V.N., Sheth,N.U., Serrano,M.G., Glascock,A.L., Fettweis,J.M., Strauss Iii,J.…	['"Eubacterium crispatum" Brygoo and Aladame 1953;authority', 'Eubacterium crispatum;synonym', 'Lactobacillus crispatus (Brygoo and Aladame 1953) Moore and Holdeman 1970 (Approved Lists) emend. Cato et al. 1983;authority']	d__Bacteria;p__Firmicutes;c__Bacilli;o__Lactobacillales;f__Lactobacillaceae;g__Lactobacillus;s__Lactobacillus crispatus	GCF_002088015.1	95	d__Bacteria;p__Firmicutes;c__Bacilli;o__Lactobacillales;f__Lactobacillaceae;g__Lactobacillus;s__Lactobacillus crispatus	97.84	0.75	GCF_002088015.1	95	d__Bacteria;p__Firmicutes;c__Bacilli;o__Lactobacillales;f__Lactobacillaceae;g__Lactobacillus;s__Lactobacillus crispatus	97.84	0.75	d__Bacteria;p__Firmicutes;c__Bacilli;o__Lactobacillales;f__Lactobacillaceae;g__Lactobacillus;s__	taxonomic classification defined by topology and ANI	topological placement and ANI have congruent species assignments
GCF_001546015.1	Lactobacillus crispatus	VMC1	Lactobacillus crispatus	Species	267	241	52711	2065524	36.82	18310	98.7	0.09	0	Homo sapiens	vaginal	USA: Virginia	N/A	2009	N/A	47770	cellular organisms; Bacteria; Terrabacteria group; Firmicutes; Bacilli; Lactobacillales; Lactobacillaceae; Lactobacillus; Lactobacillus crispatus	131567 2 1783272 1239 91061 186826 33958 1578 47770	SAMN03893599	PRJNA290636	Scaffold		LJCZ01	1960	2016-02-02T00:00:00Z	ftp://ftp.ncbi.nlm.nih.gov/genomes/all/GCF/001/546/015/GCF_001546015.1_ASM154601v1	WGS;RefSeq	BioProject:PRJNA224116;BioSample:SAMN03893599;Assembly:GCF_001546015.1	{'mol_type': ['genomic DNA'], 'strain': ['VMC1'], 'collection_date': ['2009'], 'country': ['USA: Virginia'], 'isolation_source': ['vaginal'], 'db_xref': ['taxon:47770'], 'host': ['Homo sapiens'], 'organism': ['Lactobacillus crispatus']}	{'journal': 'Unpublished', 'title': 'Comparison of Lactobacillus crispatus strains from healthy women and those with bacterial vaginosis', 'pubmed_id': '', 'authors': 'Abdelmaksoud,A., Koparde,V.N., Sheth,N., Serrano,M.G., Glascock,A., Fettweis,J.M., Strauss,J.F. III, Buck,G.A. and Jefferson,K.'}	['"Eubacterium crispatum" Brygoo and Aladame 1953;authority', 'Eubacterium crispatum;synonym', 'Lactobacillus crispatus (Brygoo and Aladame 1953) Moore and Holdeman 1970 (Approved Lists) emend. Cato et al. 1983;authority']	d__Bacteria;p__Firmicutes;c__Bacilli;o__Lactobacillales;f__Lactobacillaceae;g__Lactobacillus;s__Lactobacillus crispatus	GCF_002088015.1	95	d__Bacteria;p__Firmicutes;c__Bacilli;o__Lactobacillales;f__Lactobacillaceae;g__Lactobacillus;s__Lactobacillus crispatus	98.02	0.81	GCF_002088015.1	95	d__Bacteria;p__Firmicutes;c__Bacilli;o__Lactobacillales;f__Lactobacillaceae;g__Lactobacillus;s__Lactobacillus crispatus	98.02	0.81	d__Bacteria;p__Firmicutes;c__Bacilli;o__Lactobacillales;f__Lactobacillaceae;g__Lactobacillus;s__	taxonomic classification defined by topology and ANI	topological placement and ANI have congruent species assignments
GCF_001546025.1	Lactobacillus crispatus	VMC2	Lactobacillus crispatus	Species	258	239	113334	2195633	36.89	18663	98.9	0.82	0	Homo sapiens	vaginal	USA: Virginia	N/A	2009	N/A	47770	cellular organisms; Bacteria; Terrabacteria group; Firmicutes; Bacilli; Lactobacillales; Lactobacillaceae; Lactobacillus; Lactobacillus crispatus	131567 2 1783272 1239 91061 186826 33958 1578 47770	SAMN03893600	PRJNA290636	Scaffold		LJDA01	2088	2016-02-02T00:00:00Z	ftp://ftp.ncbi.nlm.nih.gov/genomes/all/GCF/001/546/025/GCF_001546025.1_ASM154602v1	WGS;RefSeq	BioProject:PRJNA224116;BioSample:SAMN03893600;Assembly:GCF_001546025.1	{'mol_type': ['genomic DNA'], 'strain': ['VMC2'], 'collection_date': ['2009'], 'country': ['USA: Virginia'], 'isolation_source': ['vaginal'], 'db_xref': ['taxon:47770'], 'host': ['Homo sapiens'], 'organism': ['Lactobacillus crispatus']}	{'journal': 'Unpublished', 'title': 'Comparison of Lactobacillus crispatus strains from healthy women and those with bacterial vaginosis', 'pubmed_id': '', 'authors': 'Abdelmaksoud,A., Koparde,V.N., Sheth,N., Serrano,M.G., Glascock,A., Fettweis,J.M., Strauss,J.F. III, Buck,G.A. and Jefferson,K.'}	['"Eubacterium crispatum" Brygoo and Aladame 1953;authority', 'Eubacterium crispatum;synonym', 'Lactobacillus crispatus (Brygoo and Aladame 1953) Moore and Holdeman 1970 (Approved Lists) emend. Cato et al. 1983;authority']	d__Bacteria;p__Firmicutes;c__Bacilli;o__Lactobacillales;f__Lactobacillaceae;g__Lactobacillus;s__Lactobacillus crispatus	GCF_002088015.1	95	d__Bacteria;p__Firmicutes;c__Bacilli;o__Lactobacillales;f__Lactobacillaceae;g__Lactobacillus;s__Lactobacillus crispatus	97.82	0.77	GCF_002088015.1	95	d__Bacteria;p__Firmicutes;c__Bacilli;o__Lactobacillales;f__Lactobacillaceae;g__Lactobacillus;s__Lactobacillus crispatus	97.82	0.77	d__Bacteria;p__Firmicutes;c__Bacilli;o__Lactobacillales;f__Lactobacillaceae;g__Lactobacillus;s__	taxonomic classification defined by topology and ANI	topological placement and ANI have congruent species assignments
GCF_001563615.1	Lactobacillus crispatus	PSS7772C	Lactobacillus crispatus	Species	215	215	90789	2389793	36.47	23944	99.03	2.77	0	Homo sapiens	urine	N/A	N/A	N/A	N/A	47770	cellular organisms; Bacteria; Terrabacteria group; Firmicutes; Bacilli; Lactobacillales; Lactobacillaceae; Lactobacillus; Lactobacillus crispatus	131567 2 1783272 1239 91061 186826 33958 1578 47770	SAMN03854351	PRJNA272101	Scaffold		LSQY01	2298	2016-02-18T00:00:00Z	ftp://ftp.ncbi.nlm.nih.gov/genomes/all/GCF/001/563/615/GCF_001563615.1_ASM156361v1	WGS;HIGH_QUALITY_DRAFT;RefSeq	BioProject:PRJNA224116;BioSample:SAMN03854351;Assembly:GCF_001563615.1	{'mol_type': ['genomic DNA'], 'strain': ['PSS7772C'], 'isolation_source': ['urine'], 'db_xref': ['HMP:3209', 'taxon:47770'], 'host': ['Homo sapiens'], 'organism': ['Lactobacillus crispatus']}	{'journal': 'Submitted (16-FEB-2016) McDonnell Genome Institute, Washington University School of Medicine, 4444 Forest Park, St. Louis, MO 63108, USA', 'title': 'Direct Submission', 'pubmed_id': '', 'authors': "Mitreva,M., Pepin,K.H., Mihindukulasuriya,K.A., Fulton,R., Fronick,C., O'Laughlin,M., Miner,T., Herter,B., Rosa,B.A., Cordes,M., Tomlinson,C., Wollam,A., Palsikar,V.B., Mardis,E.R. and Wil…	['"Eubacterium crispatum" Brygoo and Aladame 1953;authority', 'Eubacterium crispatum;synonym', 'Lactobacillus crispatus (Brygoo and Aladame 1953) Moore and Holdeman 1970 (Approved Lists) emend. Cato et al. 1983;authority']	d__Bacteria;p__Firmicutes;c__Bacilli;o__Lactobacillales;f__Lactobacillaceae;g__Lactobacillus;s__Lactobacillus crispatus	GCF_002088015.1	95	d__Bacteria;p__Firmicutes;c__Bacilli;o__Lactobacillales;f__Lactobacillaceae;g__Lactobacillus;s__Lactobacillus crispatus	97.59	0.81	GCF_002088015.1	95	d__Bacteria;p__Firmicutes;c__Bacilli;o__Lactobacillales;f__Lactobacillaceae;g__Lactobacillus;s__Lactobacillus crispatus	97.59	0.81	d__Bacteria;p__Firmicutes;c__Bacilli;o__Lactobacillales;f__Lactobacillaceae;g__Lactobacillus;s__	taxonomic classification defined by topology and ANI	topological placement and ANI have congruent species assignments
GCF_001700475.1	Lactobacillus crispatus	C037	Lactobacillus crispatus	Species	96	95	154997	2147531	36.69	38659	99.03	0.09	0	Homo sapiens	urine	USA: Maywood, IL	N/A	2013-11-17	N/A	47770	cellular organisms; Bacteria; Terrabacteria group; Firmicutes; Bacilli; Lactobacillales; Lactobacillaceae; Lactobacillus; Lactobacillus crispatus	131567 2 1783272 1239 91061 186826 33958 1578 47770	SAMN05244202	PRJNA316969	Scaffold		MAKH01	1943	2016-08-05T00:00:00Z	ftp://ftp.ncbi.nlm.nih.gov/genomes/all/GCF/001/700/475/GCF_001700475.1_ASM170047v1	WGS;RefSeq	BioProject:PRJNA224116;BioSample:SAMN05244202;Assembly:GCF_001700475.1	{'mol_type': ['genomic DNA'], 'strain': ['C037'], 'collection_date': ['17-Nov-2013'], 'country': ['USA: Maywood, IL'], 'isolation_source': ['urine'], 'db_xref': ['taxon:47770'], 'host': ['Homo sapiens'], 'organism': ['Lactobacillus crispatus']}	{'journal': 'Unpublished', 'title': 'Genome sequences and annotation of two urinary isolates of L. crispatus', 'pubmed_id': '', 'authors': 'Price,T.K., Shaheen,M., Kalesinskas,L., Malki,K., Hilt,E., Putonti,C. and Wolfe,A.J.'}	['"Eubacterium crispatum" Brygoo and Aladame 1953;authority', 'Eubacterium crispatum;synonym', 'Lactobacillus crispatus (Brygoo and Aladame 1953) Moore and Holdeman 1970 (Approved Lists) emend. Cato et al. 1983;authority']	d__Bacteria;p__Firmicutes;c__Bacilli;o__Lactobacillales;f__Lactobacillaceae;g__Lactobacillus;s__Lactobacillus crispatus	GCF_002088015.1	95	d__Bacteria;p__Firmicutes;c__Bacilli;o__Lactobacillales;f__Lactobacillaceae;g__Lactobacillus;s__Lactobacillus crispatus	98.04	0.86	GCF_002088015.1	95	d__Bacteria;p__Firmicutes;c__Bacilli;o__Lactobacillales;f__Lactobacillaceae;g__Lactobacillus;s__Lactobacillus crispatus	98.04	0.86	d__Bacteria;p__Firmicutes;c__Bacilli;o__Lactobacillales;f__Lactobacillaceae;g__Lactobacillus;s__	taxonomic classification defined by topology and ANI	topological placement and ANI have congruent species assignments
GCF_002861765.1	Lactobacillus crispatus	UMB0803	Lactobacillus crispatus	Species	156	151	104362	2002434	37.01	24468	99.03	0.09	0	Homo sapiens	N/A	USA: Maywood, IL	N/A	2015	N/A	47770	cellular organisms; Bacteria; Terrabacteria group; Firmicutes; Bacilli; Lactobacillales; Lactobacillaceae; Lactobacillus; Lactobacillus crispatus	131567 2 1783272 1239 91061 186826 33958 1578 47770	SAMN08193687	PRJNA316969	Scaffold		PKIY01	1840	2017-12-28T00:00:00Z	ftp://ftp.ncbi.nlm.nih.gov/genomes/all/GCF/002/861/765/GCF_002861765.1_ASM286176v1	WGS;RefSeq	BioProject:PRJNA224116;BioSample:SAMN08193687;Assembly:GCF_002861765.1	{'mol_type': ['genomic DNA'], 'strain': ['UMB0803'], 'collection_date': ['2015'], 'country': ['USA: Maywood, IL'], 'db_xref': ['taxon:47770'], 'host': ['Homo sapiens'], 'organism': ['Lactobacillus crispatus']}	{'journal': 'Unpublished', 'title': 'Phylogenetic diversity of female urinary microbiome', 'pubmed_id': '', 'authors': 'Thomas-White,K. and Wolfe,A.J.'}	['"Eubacterium crispatum" Brygoo and Aladame 1953;authority', 'Eubacterium crispatum;synonym', 'Lactobacillus crispatus (Brygoo and Aladame 1953) Moore and Holdeman 1970 (Approved Lists) emend. Cato et al. 1983;authority']	d__Bacteria;p__Firmicutes;c__Bacilli;o__Lactobacillales;f__Lactobacillaceae;g__Lactobacillus;s__Lactobacillus crispatus	GCF_002088015.1	95	d__Bacteria;p__Firmicutes;c__Bacilli;o__Lactobacillales;f__Lactobacillaceae;g__Lactobacillus;s__Lactobacillus crispatus	97.75	0.82	GCF_002088015.1	95	d__Bacteria;p__Firmicutes;c__Bacilli;o__Lactobacillales;f__Lactobacillaceae;g__Lactobacillus;s__Lactobacillus crispatus	97.75	0.82	d__Bacteria;p__Firmicutes;c__Bacilli;o__Lactobacillales;f__Lactobacillaceae;g__Lactobacillus;s__	taxonomic classification defined by topology and ANI	topological placement and ANI have congruent species assignments
GCF_002861775.1	Lactobacillus crispatus	UMB0044	Lactobacillus crispatus	Species	200	184	113716	2268133	36.89	29682	99.03	0.09	0	Homo sapiens	N/A	USA: Maywood, IL	N/A	2015	N/A	47770	cellular organisms; Bacteria; Terrabacteria group; Firmicutes; Bacilli; Lactobacillales; Lactobacillaceae; Lactobacillus; Lactobacillus crispatus	131567 2 1783272 1239 91061 186826 33958 1578 47770	SAMN08193688	PRJNA316969	Scaffold		PKIX01	2142	2017-12-28T00:00:00Z	ftp://ftp.ncbi.nlm.nih.gov/genomes/all/GCF/002/861/775/GCF_002861775.1_ASM286177v1	WGS;RefSeq	BioProject:PRJNA224116;BioSample:SAMN08193688;Assembly:GCF_002861775.1	{'mol_type': ['genomic DNA'], 'strain': ['UMB0044'], 'collection_date': ['2015'], 'country': ['USA: Maywood, IL'], 'db_xref': ['taxon:47770'], 'host': ['Homo sapiens'], 'organism': ['Lactobacillus crispatus']}	{'journal': 'Unpublished', 'title': 'Phylogenetic diversity of female urinary microbiome', 'pubmed_id': '', 'authors': 'Thomas-White,K. and Wolfe,A.J.'}	['"Eubacterium crispatum" Brygoo and Aladame 1953;authority', 'Eubacterium crispatum;synonym', 'Lactobacillus crispatus (Brygoo and Aladame 1953) Moore and Holdeman 1970 (Approved Lists) emend. Cato et al. 1983;authority']	d__Bacteria;p__Firmicutes;c__Bacilli;o__Lactobacillales;f__Lactobacillaceae;g__Lactobacillus;s__Lactobacillus crispatus	GCF_002088015.1	95	d__Bacteria;p__Firmicutes;c__Bacilli;o__Lactobacillales;f__Lactobacillaceae;g__Lactobacillus;s__Lactobacillus crispatus	97.54	0.81	GCF_002088015.1	95	d__Bacteria;p__Firmicutes;c__Bacilli;o__Lactobacillales;f__Lactobacillaceae;g__Lactobacillus;s__Lactobacillus crispatus	97.54	0.81	d__Bacteria;p__Firmicutes;c__Bacilli;o__Lactobacillales;f__Lactobacillaceae;g__Lactobacillus;s__	taxonomic classification defined by topology and ANI	topological placement and ANI have congruent species assignments
GCF_002861805.1	Lactobacillus crispatus	UMB0824	Lactobacillus crispatus	Species	94	91	128417	2172870	36.73	54252	99.03	0	0	Homo sapiens	N/A	USA: Maywood, IL	N/A	2015	N/A	47770	cellular organisms; Bacteria; Terrabacteria group; Firmicutes; Bacilli; Lactobacillales; Lactobacillaceae; Lactobacillus; Lactobacillus crispatus	131567 2 1783272 1239 91061 186826 33958 1578 47770	SAMN08193690	PRJNA316969	Contig		PKIV01	2004	2017-12-28T00:00:00Z	ftp://ftp.ncbi.nlm.nih.gov/genomes/all/GCF/002/861/805/GCF_002861805.1_ASM286180v1	WGS;RefSeq	BioProject:PRJNA224116;BioSample:SAMN08193690;Assembly:GCF_002861805.1	{'mol_type': ['genomic DNA'], 'strain': ['UMB0824'], 'collection_date': ['2015'], 'country': ['USA: Maywood, IL'], 'db_xref': ['taxon:47770'], 'host': ['Homo sapiens'], 'organism': ['Lactobacillus crispatus']}	{'journal': 'Unpublished', 'title': 'Phylogenetic diversity of female urinary microbiome', 'pubmed_id': '', 'authors': 'Thomas-White,K. and Wolfe,A.J.'}	['"Eubacterium crispatum" Brygoo and Aladame 1953;authority', 'Eubacterium crispatum;synonym', 'Lactobacillus crispatus (Brygoo and Aladame 1953) Moore and Holdeman 1970 (Approved Lists) emend. Cato et al. 1983;authority']	d__Bacteria;p__Firmicutes;c__Bacilli;o__Lactobacillales;f__Lactobacillaceae;g__Lactobacillus;s__Lactobacillus crispatus	GCF_002088015.1	95	d__Bacteria;p__Firmicutes;c__Bacilli;o__Lactobacillales;f__Lactobacillaceae;g__Lactobacillus;s__Lactobacillus crispatus	97.78	0.85	GCF_002088015.1	95	d__Bacteria;p__Firmicutes;c__Bacilli;o__Lactobacillales;f__Lactobacillaceae;g__Lactobacillus;s__Lactobacillus crispatus	97.78	0.85	d__Bacteria;p__Firmicutes;c__Bacilli;o__Lactobacillales;f__Lactobacillaceae;g__Lactobacillus;s__	taxonomic classification defined by topology and ANI	topological placement and ANI have congruent species assignments
GCF_002861815.1	Lactobacillus crispatus	UMB0085	Lactobacillus crispatus	Species	130	125	120766	2173262	36.67	35762	99.03	0.09	0	Homo sapiens	N/A	USA: Maywood, IL	N/A	2015	N/A	47770	cellular organisms; Bacteria; Terrabacteria group; Firmicutes; Bacilli; Lactobacillales; Lactobacillaceae; Lactobacillus; Lactobacillus crispatus	131567 2 1783272 1239 91061 186826 33958 1578 47770	SAMN08193689	PRJNA316969	Scaffold		PKIW01	1966	2018-01-04T00:00:00Z	ftp://ftp.ncbi.nlm.nih.gov/genomes/all/GCF/002/861/815/GCF_002861815.1_ASM286181v1	WGS;RefSeq	BioProject:PRJNA224116;BioSample:SAMN08193689;Assembly:GCF_002861815.1	{'mol_type': ['genomic DNA'], 'strain': ['UMB0085'], 'collection_date': ['2015'], 'country': ['USA: Maywood, IL'], 'db_xref': ['taxon:47770'], 'host': ['Homo sapiens'], 'organism': ['Lactobacillus crispatus']}	{'journal': 'Unpublished', 'title': 'Phylogenetic diversity of female urinary microbiome', 'pubmed_id': '', 'authors': 'Thomas-White,K. and Wolfe,A.J.'}	['"Eubacterium crispatum" Brygoo and Aladame 1953;authority', 'Eubacterium crispatum;synonym', 'Lactobacillus crispatus (Brygoo and Aladame 1953) Moore and Holdeman 1970 (Approved Lists) emend. Cato et al. 1983;authority']	d__Bacteria;p__Firmicutes;c__Bacilli;o__Lactobacillales;f__Lactobacillaceae;g__Lactobacillus;s__Lactobacillus crispatus	GCF_002088015.1	95	d__Bacteria;p__Firmicutes;c__Bacilli;o__Lactobacillales;f__Lactobacillaceae;g__Lactobacillus;s__Lactobacillus crispatus	98.05	0.86	GCF_002088015.1	95	d__Bacteria;p__Firmicutes;c__Bacilli;o__Lactobacillales;f__Lactobacillaceae;g__Lactobacillus;s__Lactobacillus crispatus	98.05	0.86	d__Bacteria;p__Firmicutes;c__Bacilli;o__Lactobacillales;f__Lactobacillaceae;g__Lactobacillus;s__	taxonomic classification defined by topology and ANI	topological placement and ANI have congruent species assignments
GCF_002863245.1	Lactobacillus crispatus	UMB0040	Lactobacillus crispatus	Species	99	94	143305	2000230	36.77	46048	99.03	0.09	0	Homo sapiens	N/A	USA: Maywood, IL	N/A	2015	N/A	47770	cellular organisms; Bacteria; Terrabacteria group; Firmicutes; Bacilli; Lactobacillales; Lactobacillaceae; Lactobacillus; Lactobacillus crispatus	131567 2 1783272 1239 91061 186826 33958 1578 47770	SAMN08193691	PRJNA316969	Scaffold		PKKH01	1776	2018-01-04T00:00:00Z	ftp://ftp.ncbi.nlm.nih.gov/genomes/all/GCF/002/863/245/GCF_002863245.1_ASM286324v1	WGS;RefSeq	BioProject:PRJNA224116;BioSample:SAMN08193691;Assembly:GCF_002863245.1	{'mol_type': ['genomic DNA'], 'strain': ['UMB0040'], 'collection_date': ['2015'], 'country': ['USA: Maywood, IL'], 'db_xref': ['taxon:47770'], 'host': ['Homo sapiens'], 'organism': ['Lactobacillus crispatus']}	{'journal': 'Unpublished', 'title': 'Phylogenetic diversity of female urinary microbiome', 'pubmed_id': '', 'authors': 'Thomas-White,K. and Wolfe,A.J.'}	['"Eubacterium crispatum" Brygoo and Aladame 1953;authority', 'Eubacterium crispatum;synonym', 'Lactobacillus crispatus (Brygoo and Aladame 1953) Moore and Holdeman 1970 (Approved Lists) emend. Cato et al. 1983;authority']	d__Bacteria;p__Firmicutes;c__Bacilli;o__Lactobacillales;f__Lactobacillaceae;g__Lactobacillus;s__Lactobacillus crispatus	GCF_002088015.1	95	d__Bacteria;p__Firmicutes;c__Bacilli;o__Lactobacillales;f__Lactobacillaceae;g__Lactobacillus;s__Lactobacillus crispatus	98.37	0.84	GCF_002088015.1	95	d__Bacteria;p__Firmicutes;c__Bacilli;o__Lactobacillales;f__Lactobacillaceae;g__Lactobacillus;s__Lactobacillus crispatus	98.37	0.84	d__Bacteria;p__Firmicutes;c__Bacilli;o__Lactobacillales;f__Lactobacillaceae;g__Lactobacillus;s__	taxonomic classification defined by topology and ANI	topological placement and ANI have congruent species assignments
GCF_002863485.1	Lactobacillus crispatus	UMB0054	Lactobacillus crispatus	Species	163	155	87641	2136061	36.84	29550	99.03	0	0	Homo sapiens	N/A	USA: Maywood, IL	N/A	2015	N/A	47770	cellular organisms; Bacteria; Terrabacteria group; Firmicutes; Bacilli; Lactobacillales; Lactobacillaceae; Lactobacillus; Lactobacillus crispatus	131567 2 1783272 1239 91061 186826 33958 1578 47770	SAMN08193693	PRJNA316969	Scaffold		PKKF01	1931	2017-12-28T00:00:00Z	ftp://ftp.ncbi.nlm.nih.gov/genomes/all/GCF/002/863/485/GCF_002863485.1_ASM286348v1	WGS;RefSeq	BioProject:PRJNA224116;BioSample:SAMN08193693;Assembly:GCF_002863485.1	{'mol_type': ['genomic DNA'], 'strain': ['UMB0054'], 'collection_date': ['2015'], 'country': ['USA: Maywood, IL'], 'db_xref': ['taxon:47770'], 'host': ['Homo sapiens'], 'organism': ['Lactobacillus crispatus']}	{'journal': 'Unpublished', 'title': 'Phylogenetic diversity of female urinary microbiome', 'pubmed_id': '', 'authors': 'Thomas-White,K. and Wolfe,A.J.'}	['"Eubacterium crispatum" Brygoo and Aladame 1953;authority', 'Eubacterium crispatum;synonym', 'Lactobacillus crispatus (Brygoo and Aladame 1953) Moore and Holdeman 1970 (Approved Lists) emend. Cato et al. 1983;authority']	d__Bacteria;p__Firmicutes;c__Bacilli;o__Lactobacillales;f__Lactobacillaceae;g__Lactobacillus;s__Lactobacillus crispatus	GCF_002088015.1	95	d__Bacteria;p__Firmicutes;c__Bacilli;o__Lactobacillales;f__Lactobacillaceae;g__Lactobacillus;s__Lactobacillus crispatus	97.45	0.81	GCF_002088015.1	95	d__Bacteria;p__Firmicutes;c__Bacilli;o__Lactobacillales;f__Lactobacillaceae;g__Lactobacillus;s__Lactobacillus crispatus	97.45	0.81	d__Bacteria;p__Firmicutes;c__Bacilli;o__Lactobacillales;f__Lactobacillaceae;g__Lactobacillus;s__	taxonomic classification defined by topology and ANI	topological placement and ANI have congruent species assignments
GCF_002863505.1	Lactobacillus crispatus	UMB1398	Lactobacillus crispatus	Species	223	210	67009	2261993	36.78	19892	99.03	0.74	0	Homo sapiens	N/A	USA: Maywood, IL	N/A	2015	N/A	47770	cellular organisms; Bacteria; Terrabacteria group; Firmicutes; Bacilli; Lactobacillales; Lactobacillaceae; Lactobacillus; Lactobacillus crispatus	131567 2 1783272 1239 91061 186826 33958 1578 47770	SAMN08193692	PRJNA316969	Scaffold		PKKG01	2112	2017-12-28T00:00:00Z	ftp://ftp.ncbi.nlm.nih.gov/genomes/all/GCF/002/863/505/GCF_002863505.1_ASM286350v1	WGS;RefSeq	BioProject:PRJNA224116;BioSample:SAMN08193692;Assembly:GCF_002863505.1	{'mol_type': ['genomic DNA'], 'strain': ['UMB1398'], 'collection_date': ['2015'], 'country': ['USA: Maywood, IL'], 'db_xref': ['taxon:47770'], 'host': ['Homo sapiens'], 'organism': ['Lactobacillus crispatus']}	{'journal': 'Unpublished', 'title': 'Phylogenetic diversity of female urinary microbiome', 'pubmed_id': '', 'authors': 'Thomas-White,K. and Wolfe,A.J.'}	['"Eubacterium crispatum" Brygoo and Aladame 1953;authority', 'Eubacterium crispatum;synonym', 'Lactobacillus crispatus (Brygoo and Aladame 1953) Moore and Holdeman 1970 (Approved Lists) emend. Cato et al. 1983;authority']	d__Bacteria;p__Firmicutes;c__Bacilli;o__Lactobacillales;f__Lactobacillaceae;g__Lactobacillus;s__Lactobacillus crispatus	GCF_002088015.1	95	d__Bacteria;p__Firmicutes;c__Bacilli;o__Lactobacillales;f__Lactobacillaceae;g__Lactobacillus;s__Lactobacillus crispatus	97.43	0.8	GCF_002088015.1	95	d__Bacteria;p__Firmicutes;c__Bacilli;o__Lactobacillales;f__Lactobacillaceae;g__Lactobacillus;s__Lactobacillus crispatus	97.43	0.8	d__Bacteria;p__Firmicutes;c__Bacilli;o__Lactobacillales;f__Lactobacillaceae;g__Lactobacillus;s__	taxonomic classification defined by topology and ANI	topological placement and ANI have congruent species assignments
GCF_003795065.1	Lactobacillus crispatus	CO3MRSI1	Lactobacillus crispatus	Species	1	1	2345902	2345902	37.09	2345902	99.03	0.65	100	Homo sapiens	Mid-vagina	USA: Baltimore	39.2904 N 76.6122 W	2010	N/A	47770	cellular organisms; Bacteria; Terrabacteria group; Firmicutes; Bacilli; Lactobacillales; Lactobacillaceae; Lactobacillus; Lactobacillus crispatus	131567 2 1783272 1239 91061 186826 33958 1578 47770	SAMN10343598	PRJNA499123	Complete	chromosome:NZ_CP033426.1/CP033426.1		2115	2018-11-19T00:00:00Z	ftp://ftp.ncbi.nlm.nih.gov/genomes/all/GCF/003/795/065/GCF_003795065.1_ASM379506v1	RefSeq	BioProject:PRJNA224116;BioSample:SAMN10343598;Assembly:GCF_003795065.1	{'mol_type': ['genomic DNA'], 'strain': ['CO3MRSI1'], 'collection_date': ['2010'], 'country': ['USA: Baltimore'], 'isolation_source': ['Mid-vagina'], 'db_xref': ['taxon:47770'], 'host': ['Homo sapiens'], 'organism': ['Lactobacillus crispatus'], 'lat_lon': ['39.2904 N 76.6122 W']}	{'journal': 'Unpublished', 'title': 'Complete Genome Sequence of Lactobacillus crispatus CO3MRSI1', 'pubmed_id': '', 'authors': 'McComb,E., Holm,J., Ma,B. and Ravel,J.'}	['"Eubacterium crispatum" Brygoo and Aladame 1953;authority', 'Eubacterium crispatum;synonym', 'Lactobacillus crispatus (Brygoo and Aladame 1953) Moore and Holdeman 1970 (Approved Lists) emend. Cato et al. 1983;authority']	d__Bacteria;p__Firmicutes;c__Bacilli;o__Lactobacillales;f__Lactobacillaceae;g__Lactobacillus;s__Lactobacillus crispatus	GCF_002088015.1	95	d__Bacteria;p__Firmicutes;c__Bacilli;o__Lactobacillales;f__Lactobacillaceae;g__Lactobacillus;s__Lactobacillus crispatus	97.43	0.88	GCF_002088015.1	95	d__Bacteria;p__Firmicutes;c__Bacilli;o__Lactobacillales;f__Lactobacillaceae;g__Lactobacillus;s__Lactobacillus crispatus	97.43	0.88	d__Bacteria;p__Firmicutes;c__Bacilli;o__Lactobacillales;f__Lactobacillaceae;g__Lactobacillus;s__	taxonomic classification defined by topology and ANI	topological placement and ANI have congruent species assignments
GCF_003971565.1	Lactobacillus crispatus	AB70	Lactobacillus crispatus	Species	2	2	2351263	2367925	37.26	2351263	99.03	0.09	0	Homo sapiens	Korean vaginal fluid	South Korea	N/A	2014-11-01	Daejeon	47770	cellular organisms; Bacteria; Terrabacteria group; Firmicutes; Bacilli; Lactobacillales; Lactobacillaceae; Lactobacillus; Lactobacillus crispatus	131567 2 1783272 1239 91061 186826 33958 1578 47770	SAMN08409124	PRJNA431864	Complete	chromosome:NZ_CP026503.1/CP026503.1; plasmid pLcAB70:NZ_CP026504.1/CP026504.1		2185	2018-12-27T00:00:00Z	ftp://ftp.ncbi.nlm.nih.gov/genomes/all/GCF/003/971/565/GCF_003971565.1_ASM397156v1	RefSeq	BioProject:PRJNA224116;BioSample:SAMN08409124;Assembly:GCF_003971565.1	{'identified_by': ['Dong-Ho Chang'], 'mol_type': ['genomic DNA'], 'strain': ['AB70'], 'lab_host': ['Byoung-Chan Kim'], 'collected_by': ['Daejeon'], 'collection_date': ['2014-11-01'], 'country': ['South Korea'], 'isolation_source': ['Korean vaginal fluid'], 'db_xref': ['taxon:47770'], 'host': ['Homo sapiens'], 'plasmid': ['pLcAB70'], 'organism': ['Lactobacillus crispatus']}	{'journal': 'Unpublished', 'title': 'Whole genome sequence of Lactobacillus crispatus AB70 isolated from vaginal fluid of Korean pregnant woman', 'pubmed_id': '', 'authors': 'Kim,B.-C., Chang,D.-H. and Jeong,H.'}	['"Eubacterium crispatum" Brygoo and Aladame 1953;authority', 'Eubacterium crispatum;synonym', 'Lactobacillus crispatus (Brygoo and Aladame 1953) Moore and Holdeman 1970 (Approved Lists) emend. Cato et al. 1983;authority']	d__Bacteria;p__Firmicutes;c__Bacilli;o__Lactobacillales;f__Lactobacillaceae;g__Lactobacillus;s__Lactobacillus crispatus	GCF_002088015.1	95	d__Bacteria;p__Firmicutes;c__Bacilli;o__Lactobacillales;f__Lactobacillaceae;g__Lactobacillus;s__Lactobacillus crispatus	97.61	0.87	GCF_002088015.1	95	d__Bacteria;p__Firmicutes;c__Bacilli;o__Lactobacillales;f__Lactobacillaceae;g__Lactobacillus;s__Lactobacillus crispatus	97.61	0.87	d__Bacteria;p__Firmicutes;c__Bacilli;o__Lactobacillales;f__Lactobacillaceae;g__Lactobacillus;s__	taxonomic classification defined by topology and ANI	topological placement and ANI have congruent species assignments
GCF_004103355.1	Lactobacillus crispatus	L49	Lactobacillus crispatus	Species	671	228	71095	2405212	36.7	23401	99.03	2.32	0	Homo sapiens	vaginal tract	China: Beijing	N/A	2010	N/A	47770	cellular organisms; Bacteria; Terrabacteria group; Firmicutes; Bacilli; Lactobacillales; Lactobacillaceae; Lactobacillus; Lactobacillus crispatus	131567 2 1783272 1239 91061 186826 33958 1578 47770	SAMN10762134	PRJNA515573	Contig		SCLX01	2279	2019-01-22T00:00:00Z	ftp://ftp.ncbi.nlm.nih.gov/genomes/all/GCF/004/103/355/GCF_004103355.1_ASM410335v1	WGS;RefSeq	BioProject:PRJNA224116;BioSample:SAMN10762134;Assembly:GCF_004103355.1	{'mol_type': ['genomic DNA'], 'strain': ['L49'], 'collection_date': ['2010'], 'country': ['China: Beijing'], 'isolation_source': ['vaginal tract'], 'db_xref': ['taxon:47770'], 'host': ['Homo sapiens'], 'organism': ['Lactobacillus crispatus']}	{'journal': 'Unpublished', 'title': 'The genome sequence of Lactobacillus crispatus L49', 'pubmed_id': '', 'authors': 'Zhong,J. and Zhang,J.'}	['"Eubacterium crispatum" Brygoo and Aladame 1953;authority', 'Eubacterium crispatum;synonym', 'Lactobacillus crispatus (Brygoo and Aladame 1953) Moore and Holdeman 1970 (Approved Lists) emend. Cato et al. 1983;authority']	d__Bacteria;p__Firmicutes;c__Bacilli;o__Lactobacillales;f__Lactobacillaceae;g__Lactobacillus;s__Lactobacillus crispatus	GCF_002088015.1	95	d__Bacteria;p__Firmicutes;c__Bacilli;o__Lactobacillales;f__Lactobacillaceae;g__Lactobacillus;s__Lactobacillus crispatus	97.47	0.82	GCF_002088015.1	95	d__Bacteria;p__Firmicutes;c__Bacilli;o__Lactobacillales;f__Lactobacillaceae;g__Lactobacillus;s__Lactobacillus crispatus	97.47	0.82	d__Bacteria;p__Firmicutes;c__Bacilli;o__Lactobacillales;f__Lactobacillaceae;g__Lactobacillus;s__	taxonomic classification defined by topology and ANI	topological placement and ANI have congruent species assignments
GCF_004361075.1	Lactobacillus crispatus	RL32	Lactobacillus crispatus	Species	417	253	85477	2312023	36.97	20232	98.7	0.57	40	Homo sapiens	mucosa of vagina [UBERON:0004983]	Netherlands: Amsterdam	52.3625 N 4.9087 E	2012-06-01	N/A	47770	cellular organisms; Bacteria; Terrabacteria group; Firmicutes; Bacilli; Lactobacillales; Lactobacillaceae; Lactobacillus; Lactobacillus crispatus	131567 2 1783272 1239 91061 186826 33958 1578 47770	SAMN07213212	PRJNA390079	Contig		NKKR01	2265	2019-03-22T00:00:00Z	ftp://ftp.ncbi.nlm.nih.gov/genomes/all/GCF/004/361/075/GCF_004361075.1_ASM436107v1	WGS;RefSeq	BioProject:PRJNA224116;BioSample:SAMN07213212;Assembly:GCF_004361075.1	{'mol_type': ['genomic DNA'], 'strain': ['RL32'], 'collection_date': ['01-Jun-2012'], 'country': ['Netherlands: Amsterdam'], 'isolation_source': ['mucosa of vagina [UBERON:0004983]'], 'db_xref': ['taxon:47770'], 'host': ['Homo sapiens'], 'organism': ['Lactobacillus crispatus'], 'lat_lon': ['52.3625 N 4.9087 E']}	{'journal': 'Submitted (21-JUN-2017) Microbiology and Systems Biology, TNO, Utrechtseweg 48, Zeist 3704 HE, Netherlands', 'title': 'Direct Submission', 'pubmed_id': '', 'authors': 'Swanenburg,J. and Kort,R.'}	['"Eubacterium crispatum" Brygoo and Aladame 1953;authority', 'Eubacterium crispatum;synonym', 'Lactobacillus crispatus (Brygoo and Aladame 1953) Moore and Holdeman 1970 (Approved Lists) emend. Cato et al. 1983;authority']	d__Bacteria;p__Firmicutes;c__Bacilli;o__Lactobacillales;f__Lactobacillaceae;g__Lactobacillus;s__Lactobacillus crispatus	GCF_002088015.1	95	d__Bacteria;p__Firmicutes;c__Bacilli;o__Lactobacillales;f__Lactobacillaceae;g__Lactobacillus;s__Lactobacillus crispatus	97.67	0.8	GCF_002088015.1	95	d__Bacteria;p__Firmicutes;c__Bacilli;o__Lactobacillales;f__Lactobacillaceae;g__Lactobacillus;s__Lactobacillus crispatus	97.67	0.8	d__Bacteria;p__Firmicutes;c__Bacilli;o__Lactobacillales;f__Lactobacillaceae;g__Lactobacillus;s__	taxonomic classification defined by topology and ANI	topological placement and ANI have congruent species assignments
GCF_004361095.1	Lactobacillus crispatus	RL31	Lactobacillus crispatus	Species	483	266	85748	2321008	36.93	20331	99.03	0.09	0	Homo sapiens	mucosa of vagina [UBERON:0004983]	Netherlands: Amsterdam	52.3625 N 4.9087 E	2012-06-01	N/A	47770	cellular organisms; Bacteria; Terrabacteria group; Firmicutes; Bacilli; Lactobacillales; Lactobacillaceae; Lactobacillus; Lactobacillus crispatus	131567 2 1783272 1239 91061 186826 33958 1578 47770	SAMN07213211	PRJNA390079	Contig		NKKS01	2275	2019-03-22T00:00:00Z	ftp://ftp.ncbi.nlm.nih.gov/genomes/all/GCF/004/361/095/GCF_004361095.1_ASM436109v1	WGS;RefSeq	BioProject:PRJNA224116;BioSample:SAMN07213211;Assembly:GCF_004361095.1	{'mol_type': ['genomic DNA'], 'strain': ['RL31'], 'collection_date': ['01-Jun-2012'], 'country': ['Netherlands: Amsterdam'], 'isolation_source': ['mucosa of vagina [UBERON:0004983]'], 'db_xref': ['taxon:47770'], 'host': ['Homo sapiens'], 'organism': ['Lactobacillus crispatus'], 'lat_lon': ['52.3625 N 4.9087 E']}	{'journal': 'Submitted (20-JUN-2017) Microbiology and Systems Biology, TNO, Utrechtseweg 48, Zeist 3704 HE, Netherlands', 'title': 'Direct Submission', 'pubmed_id': '', 'authors': 'Swanenburg,J. and Kort,R.'}	['"Eubacterium crispatum" Brygoo and Aladame 1953;authority', 'Eubacterium crispatum;synonym', 'Lactobacillus crispatus (Brygoo and Aladame 1953) Moore and Holdeman 1970 (Approved Lists) emend. Cato et al. 1983;authority']	d__Bacteria;p__Firmicutes;c__Bacilli;o__Lactobacillales;f__Lactobacillaceae;g__Lactobacillus;s__Lactobacillus crispatus	GCF_002088015.1	95	d__Bacteria;p__Firmicutes;c__Bacilli;o__Lactobacillales;f__Lactobacillaceae;g__Lactobacillus;s__Lactobacillus crispatus	97.6	0.79	GCF_002088015.1	95	d__Bacteria;p__Firmicutes;c__Bacilli;o__Lactobacillales;f__Lactobacillaceae;g__Lactobacillus;s__Lactobacillus crispatus	97.6	0.79	d__Bacteria;p__Firmicutes;c__Bacilli;o__Lactobacillales;f__Lactobacillaceae;g__Lactobacillus;s__	taxonomic classification defined by topology and ANI	topological placement and ANI have congruent species assignments
GCF_004361115.1	Lactobacillus crispatus	RL29	Lactobacillus crispatus	Species	401	268	89332	2201482	36.88	18539	99.03	0.09	0	Homo sapiens	mucosa of vagina [UBERON:0004983]	Netherlands: Amsterdam	52.3625 N 4.9087 E	2012-06-01	N/A	47770	cellular organisms; Bacteria; Terrabacteria group; Firmicutes; Bacilli; Lactobacillales; Lactobacillaceae; Lactobacillus; Lactobacillus crispatus	131567 2 1783272 1239 91061 186826 33958 1578 47770	SAMN07213209	PRJNA390079	Contig		NKKU01	2098	2019-03-22T00:00:00Z	ftp://ftp.ncbi.nlm.nih.gov/genomes/all/GCF/004/361/115/GCF_004361115.1_ASM436111v1	WGS;RefSeq	BioProject:PRJNA224116;BioSample:SAMN07213209;Assembly:GCF_004361115.1	{'mol_type': ['genomic DNA'], 'strain': ['RL29'], 'collection_date': ['01-Jun-2012'], 'country': ['Netherlands: Amsterdam'], 'isolation_source': ['mucosa of vagina [UBERON:0004983]'], 'db_xref': ['taxon:47770'], 'host': ['Homo sapiens'], 'organism': ['Lactobacillus crispatus'], 'lat_lon': ['52.3625 N 4.9087 E']}	{'journal': 'Submitted (20-JUN-2017) Microbiology and Systems Biology, TNO, Utrechtseweg 48, Zeist 3704 HE, Netherlands', 'title': 'Direct Submission', 'pubmed_id': '', 'authors': 'Swanenburg,J. and Kort,R.'}	['"Eubacterium crispatum" Brygoo and Aladame 1953;authority', 'Eubacterium crispatum;synonym', 'Lactobacillus crispatus (Brygoo and Aladame 1953) Moore and Holdeman 1970 (Approved Lists) emend. Cato et al. 1983;authority']	d__Bacteria;p__Firmicutes;c__Bacilli;o__Lactobacillales;f__Lactobacillaceae;g__Lactobacillus;s__Lactobacillus crispatus	GCF_002088015.1	95	d__Bacteria;p__Firmicutes;c__Bacilli;o__Lactobacillales;f__Lactobacillaceae;g__Lactobacillus;s__Lactobacillus crispatus	97.71	0.8	GCF_002088015.1	95	d__Bacteria;p__Firmicutes;c__Bacilli;o__Lactobacillales;f__Lactobacillaceae;g__Lactobacillus;s__Lactobacillus crispatus	97.71	0.8	d__Bacteria;p__Firmicutes;c__Bacilli;o__Lactobacillales;f__Lactobacillaceae;g__Lactobacillus;s__	taxonomic classification defined by topology and ANI	topological placement and ANI have congruent species assignments
GCF_004361125.1	Lactobacillus crispatus	RL28	Lactobacillus crispatus	Species	438	249	207309	2170735	36.88	19969	99.03	0.42	0	Homo sapiens	mucosa of vagina [UBERON:0004983]	Netherlands: Amsterdam	52.3625 N 4.9087 E	2012-06-01	N/A	47770	cellular organisms; Bacteria; Terrabacteria group; Firmicutes; Bacilli; Lactobacillales; Lactobacillaceae; Lactobacillus; Lactobacillus crispatus	131567 2 1783272 1239 91061 186826 33958 1578 47770	SAMN07213208	PRJNA390079	Scaffold		NKKV01	2091	2019-03-22T00:00:00Z	ftp://ftp.ncbi.nlm.nih.gov/genomes/all/GCF/004/361/125/GCF_004361125.1_ASM436112v1	WGS;RefSeq	BioProject:PRJNA224116;BioSample:SAMN07213208;Assembly:GCF_004361125.1	{'mol_type': ['genomic DNA'], 'strain': ['RL28'], 'collection_date': ['01-Jun-2012'], 'country': ['Netherlands: Amsterdam'], 'isolation_source': ['mucosa of vagina [UBERON:0004983]'], 'db_xref': ['taxon:47770'], 'host': ['Homo sapiens'], 'organism': ['Lactobacillus crispatus'], 'lat_lon': ['52.3625 N 4.9087 E']}	{'journal': 'Submitted (20-JUN-2017) Microbiology and Systems Biology, TNO, Utrechtseweg 48, Zeist 3704 HE, Netherlands', 'title': 'Direct Submission', 'pubmed_id': '', 'authors': 'Swanenburg,J. and Kort,R.'}	['"Eubacterium crispatum" Brygoo and Aladame 1953;authority', 'Eubacterium crispatum;synonym', 'Lactobacillus crispatus (Brygoo and Aladame 1953) Moore and Holdeman 1970 (Approved Lists) emend. Cato et al. 1983;authority']	d__Bacteria;p__Firmicutes;c__Bacilli;o__Lactobacillales;f__Lactobacillaceae;g__Lactobacillus;s__Lactobacillus crispatus	GCF_002088015.1	95	d__Bacteria;p__Firmicutes;c__Bacilli;o__Lactobacillales;f__Lactobacillaceae;g__Lactobacillus;s__Lactobacillus crispatus	97.61	0.8	GCF_002088015.1	95	d__Bacteria;p__Firmicutes;c__Bacilli;o__Lactobacillales;f__Lactobacillaceae;g__Lactobacillus;s__Lactobacillus crispatus	97.61	0.8	d__Bacteria;p__Firmicutes;c__Bacilli;o__Lactobacillales;f__Lactobacillaceae;g__Lactobacillus;s__	taxonomic classification defined by topology and ANI	topological placement and ANI have congruent species assignments
GCF_004361175.1	Lactobacillus crispatus	RL26	Lactobacillus crispatus	Species	443	264	77587	2206799	36.9	17895	99.03	0.17	0	Homo sapiens	mucosa of vagina [UBERON:0004983]	Netherlands: Amsterdam	52.3625 N 4.9087 E	2012-06-01	N/A	47770	cellular organisms; Bacteria; Terrabacteria group; Firmicutes; Bacilli; Lactobacillales; Lactobacillaceae; Lactobacillus; Lactobacillus crispatus	131567 2 1783272 1239 91061 186826 33958 1578 47770	SAMN07213206	PRJNA390079	Scaffold		NKKX01	2108	2019-03-22T00:00:00Z	ftp://ftp.ncbi.nlm.nih.gov/genomes/all/GCF/004/361/175/GCF_004361175.1_ASM436117v1	WGS;RefSeq	BioProject:PRJNA224116;BioSample:SAMN07213206;Assembly:GCF_004361175.1	{'mol_type': ['genomic DNA'], 'strain': ['RL26'], 'collection_date': ['01-Jun-2012'], 'country': ['Netherlands: Amsterdam'], 'isolation_source': ['mucosa of vagina [UBERON:0004983]'], 'db_xref': ['taxon:47770'], 'host': ['Homo sapiens'], 'organism': ['Lactobacillus crispatus'], 'lat_lon': ['52.3625 N 4.9087 E']}	{'journal': 'Submitted (20-JUN-2017) Microbiology and Systems Biology, TNO, Utrechtseweg 48, Zeist 3704 HE, Netherlands', 'title': 'Direct Submission', 'pubmed_id': '', 'authors': 'Swanenburg,J. and Kort,R.'}	['"Eubacterium crispatum" Brygoo and Aladame 1953;authority', 'Eubacterium crispatum;synonym', 'Lactobacillus crispatus (Brygoo and Aladame 1953) Moore and Holdeman 1970 (Approved Lists) emend. Cato et al. 1983;authority']	d__Bacteria;p__Firmicutes;c__Bacilli;o__Lactobacillales;f__Lactobacillaceae;g__Lactobacillus;s__Lactobacillus crispatus	GCF_002088015.1	95	d__Bacteria;p__Firmicutes;c__Bacilli;o__Lactobacillales;f__Lactobacillaceae;g__Lactobacillus;s__Lactobacillus crispatus	97.66	0.79	GCF_002088015.1	95	d__Bacteria;p__Firmicutes;c__Bacilli;o__Lactobacillales;f__Lactobacillaceae;g__Lactobacillus;s__Lactobacillus crispatus	97.66	0.79	d__Bacteria;p__Firmicutes;c__Bacilli;o__Lactobacillales;f__Lactobacillaceae;g__Lactobacillus;s__	taxonomic classification defined by topology and ANI	topological placement and ANI have congruent species assignments
GCF_004361185.1	Lactobacillus crispatus	RL24	Lactobacillus crispatus	Species	319	243	93772	2365685	36.72	20353	98.7	0.28	0	Homo sapiens	mucosa of vagina [UBERON:0004983]	Netherlands: Amsterdam	52.3625 N 4.9087 E	2012-06-01	N/A	47770	cellular organisms; Bacteria; Terrabacteria group; Firmicutes; Bacilli; Lactobacillales; Lactobacillaceae; Lactobacillus; Lactobacillus crispatus	131567 2 1783272 1239 91061 186826 33958 1578 47770	SAMN07213204	PRJNA390079	Scaffold		NKKZ01	2249	2019-03-22T00:00:00Z	ftp://ftp.ncbi.nlm.nih.gov/genomes/all/GCF/004/361/185/GCF_004361185.1_ASM436118v1	WGS;RefSeq	BioProject:PRJNA224116;BioSample:SAMN07213204;Assembly:GCF_004361185.1	{'mol_type': ['genomic DNA'], 'strain': ['RL24'], 'collection_date': ['01-Jun-2012'], 'country': ['Netherlands: Amsterdam'], 'isolation_source': ['mucosa of vagina [UBERON:0004983]'], 'db_xref': ['taxon:47770'], 'host': ['Homo sapiens'], 'organism': ['Lactobacillus crispatus'], 'lat_lon': ['52.3625 N 4.9087 E']}	{'journal': 'Submitted (20-JUN-2017) Microbiology and Systems Biology, TNO, Utrechtseweg 48, Zeist 3704 HE, Netherlands', 'title': 'Direct Submission', 'pubmed_id': '', 'authors': 'Swanenburg,J. and Kort,R.'}	['"Eubacterium crispatum" Brygoo and Aladame 1953;authority', 'Eubacterium crispatum;synonym', 'Lactobacillus crispatus (Brygoo and Aladame 1953) Moore and Holdeman 1970 (Approved Lists) emend. Cato et al. 1983;authority']	d__Bacteria;p__Firmicutes;c__Bacilli;o__Lactobacillales;f__Lactobacillaceae;g__Lactobacillus;s__Lactobacillus crispatus	GCF_002088015.1	95	d__Bacteria;p__Firmicutes;c__Bacilli;o__Lactobacillales;f__Lactobacillaceae;g__Lactobacillus;s__Lactobacillus crispatus	97.66	0.79	GCF_002088015.1	95	d__Bacteria;p__Firmicutes;c__Bacilli;o__Lactobacillales;f__Lactobacillaceae;g__Lactobacillus;s__Lactobacillus crispatus	97.66	0.79	d__Bacteria;p__Firmicutes;c__Bacilli;o__Lactobacillales;f__Lactobacillaceae;g__Lactobacillus;s__	taxonomic classification defined by topology and ANI	topological placement and ANI have congruent species assignments
GCF_004361195.1	Lactobacillus crispatus	RL21	Lactobacillus crispatus	Species	489	275	114719	2494451	36.79	24346	99.03	0.93	0	Homo sapiens	mucosa of vagina [UBERON:0004983]	Netherlands: Amsterdam	52.3625 N 4.9087 E	2012-06-01	N/A	47770	cellular organisms; Bacteria; Terrabacteria group; Firmicutes; Bacilli; Lactobacillales; Lactobacillaceae; Lactobacillus; Lactobacillus crispatus	131567 2 1783272 1239 91061 186826 33958 1578 47770	SAMN07213201	PRJNA390079	Scaffold		NKLB01	2441	2019-03-22T00:00:00Z	ftp://ftp.ncbi.nlm.nih.gov/genomes/all/GCF/004/361/195/GCF_004361195.1_ASM436119v1	WGS;RefSeq	BioProject:PRJNA224116;BioSample:SAMN07213201;Assembly:GCF_004361195.1	{'mol_type': ['genomic DNA'], 'strain': ['RL21'], 'collection_date': ['01-Jun-2012'], 'country': ['Netherlands: Amsterdam'], 'isolation_source': ['mucosa of vagina [UBERON:0004983]'], 'db_xref': ['taxon:47770'], 'host': ['Homo sapiens'], 'organism': ['Lactobacillus crispatus'], 'lat_lon': ['52.3625 N 4.9087 E']}	{'journal': 'Submitted (21-JUN-2017) Microbiology and Systems Biology, TNO, Utrechtseweg 48, Zeist 3704 HE, Netherlands', 'title': 'Direct Submission', 'pubmed_id': '', 'authors': 'Swanenburg,J. and Kort,R.'}	['"Eubacterium crispatum" Brygoo and Aladame 1953;authority', 'Eubacterium crispatum;synonym', 'Lactobacillus crispatus (Brygoo and Aladame 1953) Moore and Holdeman 1970 (Approved Lists) emend. Cato et al. 1983;authority']	d__Bacteria;p__Firmicutes;c__Bacilli;o__Lactobacillales;f__Lactobacillaceae;g__Lactobacillus;s__Lactobacillus crispatus	GCF_002088015.1	95	d__Bacteria;p__Firmicutes;c__Bacilli;o__Lactobacillales;f__Lactobacillaceae;g__Lactobacillus;s__Lactobacillus crispatus	97.68	0.78	GCF_002088015.1	95	d__Bacteria;p__Firmicutes;c__Bacilli;o__Lactobacillales;f__Lactobacillaceae;g__Lactobacillus;s__Lactobacillus crispatus	97.68	0.78	d__Bacteria;p__Firmicutes;c__Bacilli;o__Lactobacillales;f__Lactobacillaceae;g__Lactobacillus;s__	taxonomic classification defined by topology and ANI	topological placement and ANI have congruent species assignments
GCF_004361205.1	Lactobacillus crispatus	RL19	Lactobacillus crispatus	Species	541	274	93767	2211231	36.93	17653	98.7	0.42	0	Homo sapiens	mucosa of vagina [UBERON:0004983]	Netherlands: Amsterdam	52.3625 N 4.9087 E	2012-06-01	N/A	47770	cellular organisms; Bacteria; Terrabacteria group; Firmicutes; Bacilli; Lactobacillales; Lactobacillaceae; Lactobacillus; Lactobacillus crispatus	131567 2 1783272 1239 91061 186826 33958 1578 47770	SAMN07213199	PRJNA390079	Scaffold		NKLD01	2143	2019-03-22T00:00:00Z	ftp://ftp.ncbi.nlm.nih.gov/genomes/all/GCF/004/361/205/GCF_004361205.1_ASM436120v1	WGS;RefSeq	BioProject:PRJNA224116;BioSample:SAMN07213199;Assembly:GCF_004361205.1	{'mol_type': ['genomic DNA'], 'strain': ['RL19'], 'collection_date': ['01-Jun-2012'], 'country': ['Netherlands: Amsterdam'], 'isolation_source': ['mucosa of vagina [UBERON:0004983]'], 'db_xref': ['taxon:47770'], 'host': ['Homo sapiens'], 'organism': ['Lactobacillus crispatus'], 'lat_lon': ['52.3625 N 4.9087 E']}	{'journal': 'Submitted (20-JUN-2017) Microbiology and Systems Biology, TNO, Utrechtseweg 48, Zeist 3704 HE, Netherlands', 'title': 'Direct Submission', 'pubmed_id': '', 'authors': 'Swanenburg,J. and Kort,R.'}	['"Eubacterium crispatum" Brygoo and Aladame 1953;authority', 'Eubacterium crispatum;synonym', 'Lactobacillus crispatus (Brygoo and Aladame 1953) Moore and Holdeman 1970 (Approved Lists) emend. Cato et al. 1983;authority']	d__Bacteria;p__Firmicutes;c__Bacilli;o__Lactobacillales;f__Lactobacillaceae;g__Lactobacillus;s__Lactobacillus crispatus	GCF_002088015.1	95	d__Bacteria;p__Firmicutes;c__Bacilli;o__Lactobacillales;f__Lactobacillaceae;g__Lactobacillus;s__Lactobacillus crispatus	97.61	0.8	GCF_002088015.1	95	d__Bacteria;p__Firmicutes;c__Bacilli;o__Lactobacillales;f__Lactobacillaceae;g__Lactobacillus;s__Lactobacillus crispatus	97.61	0.8	d__Bacteria;p__Firmicutes;c__Bacilli;o__Lactobacillales;f__Lactobacillaceae;g__Lactobacillus;s__	taxonomic classification defined by topology and ANI	topological placement and ANI have congruent species assignments
GCF_004361215.1	Lactobacillus crispatus	RL17	Lactobacillus crispatus	Species	616	248	164816	2316909	37.08	24634	99.03	0.09	0	Homo sapiens	mucosa of vagina [UBERON:0004983]	Netherlands: Amsterdam	52.3625 N 4.9087 E	2012-06-01	N/A	47770	cellular organisms; Bacteria; Terrabacteria group; Firmicutes; Bacilli; Lactobacillales; Lactobacillaceae; Lactobacillus; Lactobacillus crispatus	131567 2 1783272 1239 91061 186826 33958 1578 47770	SAMN07213198	PRJNA390079	Contig		NKLE01	2336	2019-03-22T00:00:00Z	ftp://ftp.ncbi.nlm.nih.gov/genomes/all/GCF/004/361/215/GCF_004361215.1_ASM436121v1	WGS;RefSeq	BioProject:PRJNA224116;BioSample:SAMN07213198;Assembly:GCF_004361215.1	{'mol_type': ['genomic DNA'], 'strain': ['RL17'], 'collection_date': ['01-Jun-2012'], 'country': ['Netherlands: Amsterdam'], 'isolation_source': ['mucosa of vagina [UBERON:0004983]'], 'db_xref': ['taxon:47770'], 'host': ['Homo sapiens'], 'organism': ['Lactobacillus crispatus'], 'lat_lon': ['52.3625 N 4.9087 E']}	{'journal': 'Submitted (20-JUN-2017) Microbiology and Systems Biology, TNO, Utrechtseweg 48, Zeist 3704 HE, Netherlands', 'title': 'Direct Submission', 'pubmed_id': '', 'authors': 'Swanenburg,J. and Kort,R.'}	['"Eubacterium crispatum" Brygoo and Aladame 1953;authority', 'Eubacterium crispatum;synonym', 'Lactobacillus crispatus (Brygoo and Aladame 1953) Moore and Holdeman 1970 (Approved Lists) emend. Cato et al. 1983;authority']	d__Bacteria;p__Firmicutes;c__Bacilli;o__Lactobacillales;f__Lactobacillaceae;g__Lactobacillus;s__Lactobacillus crispatus	GCF_002088015.1	95	d__Bacteria;p__Firmicutes;c__Bacilli;o__Lactobacillales;f__Lactobacillaceae;g__Lactobacillus;s__Lactobacillus crispatus	97.7	0.8	GCF_002088015.1	95	d__Bacteria;p__Firmicutes;c__Bacilli;o__Lactobacillales;f__Lactobacillaceae;g__Lactobacillus;s__Lactobacillus crispatus	97.7	0.8	d__Bacteria;p__Firmicutes;c__Bacilli;o__Lactobacillales;f__Lactobacillaceae;g__Lactobacillus;s__	taxonomic classification defined by topology and ANI	topological placement and ANI have congruent species assignments
GCF_004361245.1	Lactobacillus crispatus	RL15	Lactobacillus crispatus	Species	386	242	70644	2272468	36.79	23241	99.03	0.09	0	Homo sapiens	mucosa of vagina [UBERON:0004983]	Netherlands: Amsterdam	52.3625 N 4.9087 E	2012-06-01	N/A	47770	cellular organisms; Bacteria; Terrabacteria group; Firmicutes; Bacilli; Lactobacillales; Lactobacillaceae; Lactobacillus; Lactobacillus crispatus	131567 2 1783272 1239 91061 186826 33958 1578 47770	SAMN07213196	PRJNA390079	Scaffold		NKLG01	2219	2019-03-22T00:00:00Z	ftp://ftp.ncbi.nlm.nih.gov/genomes/all/GCF/004/361/245/GCF_004361245.1_ASM436124v1	WGS;RefSeq	BioProject:PRJNA224116;BioSample:SAMN07213196;Assembly:GCF_004361245.1	{'mol_type': ['genomic DNA'], 'strain': ['RL15'], 'collection_date': ['01-Jun-2012'], 'country': ['Netherlands: Amsterdam'], 'isolation_source': ['mucosa of vagina [UBERON:0004983]'], 'db_xref': ['taxon:47770'], 'host': ['Homo sapiens'], 'organism': ['Lactobacillus crispatus'], 'lat_lon': ['52.3625 N 4.9087 E']}	{'journal': 'Submitted (20-JUN-2017) Microbiology and Systems Biology, TNO, Utrechtseweg 48, Zeist 3704 HE, Netherlands', 'title': 'Direct Submission', 'pubmed_id': '', 'authors': 'Swanenburg,J. and Kort,R.'}	['"Eubacterium crispatum" Brygoo and Aladame 1953;authority', 'Eubacterium crispatum;synonym', 'Lactobacillus crispatus (Brygoo and Aladame 1953) Moore and Holdeman 1970 (Approved Lists) emend. Cato et al. 1983;authority']	d__Bacteria;p__Firmicutes;c__Bacilli;o__Lactobacillales;f__Lactobacillaceae;g__Lactobacillus;s__Lactobacillus crispatus	GCF_002088015.1	95	d__Bacteria;p__Firmicutes;c__Bacilli;o__Lactobacillales;f__Lactobacillaceae;g__Lactobacillus;s__Lactobacillus crispatus	97.71	0.79	GCF_002088015.1	95	d__Bacteria;p__Firmicutes;c__Bacilli;o__Lactobacillales;f__Lactobacillaceae;g__Lactobacillus;s__Lactobacillus crispatus	97.71	0.79	d__Bacteria;p__Firmicutes;c__Bacilli;o__Lactobacillales;f__Lactobacillaceae;g__Lactobacillus;s__	taxonomic classification defined by topology and ANI	topological placement and ANI have congruent species assignments
GCF_004361265.1	Lactobacillus crispatus	RL13	Lactobacillus crispatus	Species	434	261	114823	2188883	36.89	19461	99.03	0.42	0	Homo sapiens	mucosa of vagina [UBERON:0004983]	Netherlands: Amsterdam	52.3625 N 4.9087 E	2012-06-01	N/A	47770	cellular organisms; Bacteria; Terrabacteria group; Firmicutes; Bacilli; Lactobacillales; Lactobacillaceae; Lactobacillus; Lactobacillus crispatus	131567 2 1783272 1239 91061 186826 33958 1578 47770	SAMN07213194	PRJNA390079	Contig		NKLI01	2090	2019-03-22T00:00:00Z	ftp://ftp.ncbi.nlm.nih.gov/genomes/all/GCF/004/361/265/GCF_004361265.1_ASM436126v1	WGS;RefSeq	BioProject:PRJNA224116;BioSample:SAMN07213194;Assembly:GCF_004361265.1	{'mol_type': ['genomic DNA'], 'strain': ['RL13'], 'collection_date': ['01-Jun-2012'], 'country': ['Netherlands: Amsterdam'], 'isolation_source': ['mucosa of vagina [UBERON:0004983]'], 'db_xref': ['taxon:47770'], 'host': ['Homo sapiens'], 'organism': ['Lactobacillus crispatus'], 'lat_lon': ['52.3625 N 4.9087 E']}	{'journal': 'Submitted (20-JUN-2017) Microbiology and Systems Biology, TNO, Utrechtseweg 48, Zeist 3704 HE, Netherlands', 'title': 'Direct Submission', 'pubmed_id': '', 'authors': 'Swanenburg,J. and Kort,R.'}	['"Eubacterium crispatum" Brygoo and Aladame 1953;authority', 'Eubacterium crispatum;synonym', 'Lactobacillus crispatus (Brygoo and Aladame 1953) Moore and Holdeman 1970 (Approved Lists) emend. Cato et al. 1983;authority']	d__Bacteria;p__Firmicutes;c__Bacilli;o__Lactobacillales;f__Lactobacillaceae;g__Lactobacillus;s__Lactobacillus crispatus	GCF_002088015.1	95	d__Bacteria;p__Firmicutes;c__Bacilli;o__Lactobacillales;f__Lactobacillaceae;g__Lactobacillus;s__Lactobacillus crispatus	97.65	0.79	GCF_002088015.1	95	d__Bacteria;p__Firmicutes;c__Bacilli;o__Lactobacillales;f__Lactobacillaceae;g__Lactobacillus;s__Lactobacillus crispatus	97.65	0.79	d__Bacteria;p__Firmicutes;c__Bacilli;o__Lactobacillales;f__Lactobacillaceae;g__Lactobacillus;s__	taxonomic classification defined by topology and ANI	topological placement and ANI have congruent species assignments
GCF_004361295.1	Lactobacillus crispatus	RL11	Lactobacillus crispatus	Species	280	235	151614	2169059	36.9	19140	99.03	0.09	0	Homo sapiens	mucosa of vagina [UBERON:0004983]	Netherlands: Amsterdam	52.3625 N 4.9087 E	2012-06-01	N/A	47770	cellular organisms; Bacteria; Terrabacteria group; Firmicutes; Bacilli; Lactobacillales; Lactobacillaceae; Lactobacillus; Lactobacillus crispatus	131567 2 1783272 1239 91061 186826 33958 1578 47770	SAMN07213193	PRJNA390079	Scaffold		NKLJ01	2067	2019-03-22T00:00:00Z	ftp://ftp.ncbi.nlm.nih.gov/genomes/all/GCF/004/361/295/GCF_004361295.1_ASM436129v1	WGS;RefSeq	BioProject:PRJNA224116;BioSample:SAMN07213193;Assembly:GCF_004361295.1	{'mol_type': ['genomic DNA'], 'strain': ['RL11'], 'collection_date': ['01-Jun-2012'], 'country': ['Netherlands: Amsterdam'], 'isolation_source': ['mucosa of vagina [UBERON:0004983]'], 'db_xref': ['taxon:47770'], 'host': ['Homo sapiens'], 'organism': ['Lactobacillus crispatus'], 'lat_lon': ['52.3625 N 4.9087 E']}	{'journal': 'Submitted (20-JUN-2017) Microbiology and Systems Biology, TNO, Utrechtseweg 48, Zeist 3704 HE, Netherlands', 'title': 'Direct Submission', 'pubmed_id': '', 'authors': 'Swanenburg,J. and Kort,R.'}	['"Eubacterium crispatum" Brygoo and Aladame 1953;authority', 'Eubacterium crispatum;synonym', 'Lactobacillus crispatus (Brygoo and Aladame 1953) Moore and Holdeman 1970 (Approved Lists) emend. Cato et al. 1983;authority']	d__Bacteria;p__Firmicutes;c__Bacilli;o__Lactobacillales;f__Lactobacillaceae;g__Lactobacillus;s__Lactobacillus crispatus	GCF_002088015.1	95	d__Bacteria;p__Firmicutes;c__Bacilli;o__Lactobacillales;f__Lactobacillaceae;g__Lactobacillus;s__Lactobacillus crispatus	97.63	0.8	GCF_002088015.1	95	d__Bacteria;p__Firmicutes;c__Bacilli;o__Lactobacillales;f__Lactobacillaceae;g__Lactobacillus;s__Lactobacillus crispatus	97.63	0.8	d__Bacteria;p__Firmicutes;c__Bacilli;o__Lactobacillales;f__Lactobacillaceae;g__Lactobacillus;s__	taxonomic classification defined by topology and ANI	topological placement and ANI have congruent species assignments
GCF_004361315.1	Lactobacillus crispatus	RL08	Lactobacillus crispatus	Species	364	233	114474	2253009	36.82	21627	99.03	0.31	0	Homo sapiens	mucosa of vagina [UBERON:0004983]	Netherlands: Amsterdam	52.3625 N 4.9087 E	2012-06-01	N/A	47770	cellular organisms; Bacteria; Terrabacteria group; Firmicutes; Bacilli; Lactobacillales; Lactobacillaceae; Lactobacillus; Lactobacillus crispatus	131567 2 1783272 1239 91061 186826 33958 1578 47770	SAMN07213190	PRJNA390079	Contig		NKLM01	2190	2019-03-22T00:00:00Z	ftp://ftp.ncbi.nlm.nih.gov/genomes/all/GCF/004/361/315/GCF_004361315.1_ASM436131v1	WGS;RefSeq	BioProject:PRJNA224116;BioSample:SAMN07213190;Assembly:GCF_004361315.1	{'mol_type': ['genomic DNA'], 'strain': ['RL08'], 'collection_date': ['01-Jun-2012'], 'country': ['Netherlands: Amsterdam'], 'isolation_source': ['mucosa of vagina [UBERON:0004983]'], 'db_xref': ['taxon:47770'], 'host': ['Homo sapiens'], 'organism': ['Lactobacillus crispatus'], 'lat_lon': ['52.3625 N 4.9087 E']}	{'journal': 'Submitted (20-JUN-2017) Microbiology and Systems Biology, TNO, Utrechtseweg 48, Zeist 3704 HE, Netherlands', 'title': 'Direct Submission', 'pubmed_id': '', 'authors': 'Swanenburg,J. and Kort,R.'}	['"Eubacterium crispatum" Brygoo and Aladame 1953;authority', 'Eubacterium crispatum;synonym', 'Lactobacillus crispatus (Brygoo and Aladame 1953) Moore and Holdeman 1970 (Approved Lists) emend. Cato et al. 1983;authority']	d__Bacteria;p__Firmicutes;c__Bacilli;o__Lactobacillales;f__Lactobacillaceae;g__Lactobacillus;s__Lactobacillus crispatus	GCF_002088015.1	95	d__Bacteria;p__Firmicutes;c__Bacilli;o__Lactobacillales;f__Lactobacillaceae;g__Lactobacillus;s__Lactobacillus crispatus	97.75	0.79	GCF_002088015.1	95	d__Bacteria;p__Firmicutes;c__Bacilli;o__Lactobacillales;f__Lactobacillaceae;g__Lactobacillus;s__Lactobacillus crispatus	97.75	0.79	d__Bacteria;p__Firmicutes;c__Bacilli;o__Lactobacillales;f__Lactobacillaceae;g__Lactobacillus;s__	taxonomic classification defined by topology and ANI	topological placement and ANI have congruent species assignments
GCF_004361345.1	Lactobacillus crispatus	RL05	Lactobacillus crispatus	Species	431	316	66533	2535167	36.39	15415	98.38	2.4	0	Homo sapiens	mucosa of vagina [UBERON:0004983]	Netherlands: Amsterdam	52.3625 N 4.9087 E	2012-06-01	N/A	47770	cellular organisms; Bacteria; Terrabacteria group; Firmicutes; Bacilli; Lactobacillales; Lactobacillaceae; Lactobacillus; Lactobacillus crispatus	131567 2 1783272 1239 91061 186826 33958 1578 47770	SAMN07213187	PRJNA390079	Scaffold		NKLP01	2418	2019-03-22T00:00:00Z	ftp://ftp.ncbi.nlm.nih.gov/genomes/all/GCF/004/361/345/GCF_004361345.1_ASM436134v1	WGS;RefSeq	BioProject:PRJNA224116;BioSample:SAMN07213187;Assembly:GCF_004361345.1	{'mol_type': ['genomic DNA'], 'strain': ['RL05'], 'collection_date': ['01-Jun-2012'], 'country': ['Netherlands: Amsterdam'], 'isolation_source': ['mucosa of vagina [UBERON:0004983]'], 'db_xref': ['taxon:47770'], 'host': ['Homo sapiens'], 'organism': ['Lactobacillus crispatus'], 'lat_lon': ['52.3625 N 4.9087 E']}	{'journal': 'Submitted (20-JUN-2017) Microbiology and Systems Biology, TNO, Utrechtseweg 48, Zeist 3704 HE, Netherlands', 'title': 'Direct Submission', 'pubmed_id': '', 'authors': 'Swanenburg,J. and Kort,R.'}	['"Eubacterium crispatum" Brygoo and Aladame 1953;authority', 'Eubacterium crispatum;synonym', 'Lactobacillus crispatus (Brygoo and Aladame 1953) Moore and Holdeman 1970 (Approved Lists) emend. Cato et al. 1983;authority']	d__Bacteria;p__Firmicutes;c__Bacilli;o__Lactobacillales;f__Lactobacillaceae;g__Lactobacillus;s__Lactobacillus crispatus	GCF_002088015.1	95	d__Bacteria;p__Firmicutes;c__Bacilli;o__Lactobacillales;f__Lactobacillaceae;g__Lactobacillus;s__Lactobacillus crispatus	97.56	0.76	GCF_002088015.1	95	d__Bacteria;p__Firmicutes;c__Bacilli;o__Lactobacillales;f__Lactobacillaceae;g__Lactobacillus;s__Lactobacillus crispatus	97.56	0.76	d__Bacteria;p__Firmicutes;c__Bacilli;o__Lactobacillales;f__Lactobacillaceae;g__Lactobacillus;s__	taxonomic classification defined by topology and ANI	topological placement and ANI have congruent species assignments
GCF_004361355.1	Lactobacillus crispatus	RL07	Lactobacillus crispatus	Species	387	314	63244	2157615	36.94	14201	98.99	0.09	0	Homo sapiens	mucosa of vagina [UBERON:0004983]	Netherlands: Amsterdam	52.3625 N 4.9087 E	2012-06-01	N/A	47770	cellular organisms; Bacteria; Terrabacteria group; Firmicutes; Bacilli; Lactobacillales; Lactobacillaceae; Lactobacillus; Lactobacillus crispatus	131567 2 1783272 1239 91061 186826 33958 1578 47770	SAMN07213189	PRJNA390079	Contig		NKLN01	2085	2019-03-22T00:00:00Z	ftp://ftp.ncbi.nlm.nih.gov/genomes/all/GCF/004/361/355/GCF_004361355.1_ASM436135v1	WGS;RefSeq	BioProject:PRJNA224116;BioSample:SAMN07213189;Assembly:GCF_004361355.1	{'mol_type': ['genomic DNA'], 'strain': ['RL07'], 'collection_date': ['01-Jun-2012'], 'country': ['Netherlands: Amsterdam'], 'isolation_source': ['mucosa of vagina [UBERON:0004983]'], 'db_xref': ['taxon:47770'], 'host': ['Homo sapiens'], 'organism': ['Lactobacillus crispatus'], 'lat_lon': ['52.3625 N 4.9087 E']}	{'journal': 'Submitted (20-JUN-2017) Microbiology and Systems Biology, TNO, Utrechtseweg 48, Zeist 3704 HE, Netherlands', 'title': 'Direct Submission', 'pubmed_id': '', 'authors': 'Swanenburg,J. and Kort,R.'}	['"Eubacterium crispatum" Brygoo and Aladame 1953;authority', 'Eubacterium crispatum;synonym', 'Lactobacillus crispatus (Brygoo and Aladame 1953) Moore and Holdeman 1970 (Approved Lists) emend. Cato et al. 1983;authority']	d__Bacteria;p__Firmicutes;c__Bacilli;o__Lactobacillales;f__Lactobacillaceae;g__Lactobacillus;s__Lactobacillus crispatus	GCF_002088015.1	95	d__Bacteria;p__Firmicutes;c__Bacilli;o__Lactobacillales;f__Lactobacillaceae;g__Lactobacillus;s__Lactobacillus crispatus	97.53	0.79	GCF_002088015.1	95	d__Bacteria;p__Firmicutes;c__Bacilli;o__Lactobacillales;f__Lactobacillaceae;g__Lactobacillus;s__Lactobacillus crispatus	97.53	0.79	d__Bacteria;p__Firmicutes;c__Bacilli;o__Lactobacillales;f__Lactobacillaceae;g__Lactobacillus;s__	taxonomic classification defined by topology and ANI	topological placement and ANI have congruent species assignments
GCF_004361375.1	Lactobacillus crispatus	RL02	Lactobacillus crispatus	Species	291	237	73269	2224285	36.88	17672	99.03	0.09	0	Homo sapiens	mucosa of vagina [UBERON:0004983]	Netherlands: Amsterdam	52.3625 N 4.9087 E	2012-06-01	N/A	47770	cellular organisms; Bacteria; Terrabacteria group; Firmicutes; Bacilli; Lactobacillales; Lactobacillaceae; Lactobacillus; Lactobacillus crispatus	131567 2 1783272 1239 91061 186826 33958 1578 47770	SAMN07213039	PRJNA390079	Scaffold		NKLR01	2123	2019-03-22T00:00:00Z	ftp://ftp.ncbi.nlm.nih.gov/genomes/all/GCF/004/361/375/GCF_004361375.1_ASM436137v1	WGS;RefSeq	BioProject:PRJNA224116;BioSample:SAMN07213039;Assembly:GCF_004361375.1	{'mol_type': ['genomic DNA'], 'strain': ['RL02'], 'collection_date': ['01-Jun-2012'], 'country': ['Netherlands: Amsterdam'], 'isolation_source': ['mucosa of vagina [UBERON:0004983]'], 'db_xref': ['taxon:47770'], 'host': ['Homo sapiens'], 'organism': ['Lactobacillus crispatus'], 'lat_lon': ['52.3625 N 4.9087 E']}	{'journal': 'Submitted (20-JUN-2017) Microbiology and Systems Biology, TNO, Utrechtseweg 48, Zeist 3704 HE, Netherlands', 'title': 'Direct Submission', 'pubmed_id': '', 'authors': 'Swanenburg,J. and Kort,R.'}	['"Eubacterium crispatum" Brygoo and Aladame 1953;authority', 'Eubacterium crispatum;synonym', 'Lactobacillus crispatus (Brygoo and Aladame 1953) Moore and Holdeman 1970 (Approved Lists) emend. Cato et al. 1983;authority']	d__Bacteria;p__Firmicutes;c__Bacilli;o__Lactobacillales;f__Lactobacillaceae;g__Lactobacillus;s__Lactobacillus crispatus	GCF_002088015.1	95	d__Bacteria;p__Firmicutes;c__Bacilli;o__Lactobacillales;f__Lactobacillaceae;g__Lactobacillus;s__Lactobacillus crispatus	97.56	0.8	GCF_002088015.1	95	d__Bacteria;p__Firmicutes;c__Bacilli;o__Lactobacillales;f__Lactobacillaceae;g__Lactobacillus;s__Lactobacillus crispatus	97.56	0.8	d__Bacteria;p__Firmicutes;c__Bacilli;o__Lactobacillales;f__Lactobacillaceae;g__Lactobacillus;s__	taxonomic classification defined by topology and ANI	topological placement and ANI have congruent species assignments
GCF_004361385.1	Lactobacillus crispatus	RL03	Lactobacillus crispatus	Species	330	253	79405	2523940	36.86	21329	99.03	0.93	0	Homo sapiens	mucosa of vagina [UBERON:0004983]	Netherlands: Amsterdam	52.3625 N 4.9087 E	2012-06-01	N/A	47770	cellular organisms; Bacteria; Terrabacteria group; Firmicutes; Bacilli; Lactobacillales; Lactobacillaceae; Lactobacillus; Lactobacillus crispatus	131567 2 1783272 1239 91061 186826 33958 1578 47770	SAMN07213108	PRJNA390079	Contig		NKLQ01	2474	2019-03-22T00:00:00Z	ftp://ftp.ncbi.nlm.nih.gov/genomes/all/GCF/004/361/385/GCF_004361385.1_ASM436138v1	WGS;RefSeq	BioProject:PRJNA224116;BioSample:SAMN07213108;Assembly:GCF_004361385.1	{'mol_type': ['genomic DNA'], 'strain': ['RL03'], 'collection_date': ['01-Jun-2012'], 'country': ['Netherlands: Amsterdam'], 'isolation_source': ['mucosa of vagina [UBERON:0004983]'], 'db_xref': ['taxon:47770'], 'host': ['Homo sapiens'], 'organism': ['Lactobacillus crispatus'], 'lat_lon': ['52.3625 N 4.9087 E']}	{'journal': 'Submitted (20-JUN-2017) Microbiology and Systems Biology, TNO, Utrechtseweg 48, Zeist 3704 HE, Netherlands', 'title': 'Direct Submission', 'pubmed_id': '', 'authors': 'Swanenburg,J. and Kort,R.'}	['"Eubacterium crispatum" Brygoo and Aladame 1953;authority', 'Eubacterium crispatum;synonym', 'Lactobacillus crispatus (Brygoo and Aladame 1953) Moore and Holdeman 1970 (Approved Lists) emend. Cato et al. 1983;authority']	d__Bacteria;p__Firmicutes;c__Bacilli;o__Lactobacillales;f__Lactobacillaceae;g__Lactobacillus;s__Lactobacillus crispatus	GCF_002088015.1	95	d__Bacteria;p__Firmicutes;c__Bacilli;o__Lactobacillales;f__Lactobacillaceae;g__Lactobacillus;s__Lactobacillus crispatus	97.68	0.79	GCF_002088015.1	95	d__Bacteria;p__Firmicutes;c__Bacilli;o__Lactobacillales;f__Lactobacillaceae;g__Lactobacillus;s__Lactobacillus crispatus	97.68	0.79	d__Bacteria;p__Firmicutes;c__Bacilli;o__Lactobacillales;f__Lactobacillaceae;g__Lactobacillus;s__	taxonomic classification defined by topology and ANI	topological placement and ANI have congruent species assignments
GCF_004361395.1	Lactobacillus crispatus	RL33	Lactobacillus crispatus	Species	436	254	92228	2341145	36.73	19617	98.7	0.28	0	Homo sapiens	mucosa of vagina [UBERON:0004983]	Netherlands: Amsterdam	52.3625 N 4.9087 E	2012-06-01	N/A	47770	cellular organisms; Bacteria; Terrabacteria group; Firmicutes; Bacilli; Lactobacillales; Lactobacillaceae; Lactobacillus; Lactobacillus crispatus	131567 2 1783272 1239 91061 186826 33958 1578 47770	SAMN07213213	PRJNA390079	Contig		NKKQ01	2237	2019-03-22T00:00:00Z	ftp://ftp.ncbi.nlm.nih.gov/genomes/all/GCF/004/361/395/GCF_004361395.1_ASM436139v1	WGS;RefSeq	BioProject:PRJNA224116;BioSample:SAMN07213213;Assembly:GCF_004361395.1	{'mol_type': ['genomic DNA'], 'strain': ['RL33'], 'collection_date': ['01-Jun-2012'], 'country': ['Netherlands: Amsterdam'], 'isolation_source': ['mucosa of vagina [UBERON:0004983]'], 'db_xref': ['taxon:47770'], 'host': ['Homo sapiens'], 'organism': ['Lactobacillus crispatus'], 'lat_lon': ['52.3625 N 4.9087 E']}	{'journal': 'Submitted (20-JUN-2017) Microbiology and Systems Biology, TNO, Utrechtseweg 48, Zeist 3704 HE, Netherlands', 'title': 'Direct Submission', 'pubmed_id': '', 'authors': 'Swanenburg,J. and Kort,R.'}	['"Eubacterium crispatum" Brygoo and Aladame 1953;authority', 'Eubacterium crispatum;synonym', 'Lactobacillus crispatus (Brygoo and Aladame 1953) Moore and Holdeman 1970 (Approved Lists) emend. Cato et al. 1983;authority']	d__Bacteria;p__Firmicutes;c__Bacilli;o__Lactobacillales;f__Lactobacillaceae;g__Lactobacillus;s__Lactobacillus crispatus	GCF_002088015.1	95	d__Bacteria;p__Firmicutes;c__Bacilli;o__Lactobacillales;f__Lactobacillaceae;g__Lactobacillus;s__Lactobacillus crispatus	97.59	0.78	GCF_002088015.1	95	d__Bacteria;p__Firmicutes;c__Bacilli;o__Lactobacillales;f__Lactobacillaceae;g__Lactobacillus;s__Lactobacillus crispatus	97.59	0.78	d__Bacteria;p__Firmicutes;c__Bacilli;o__Lactobacillales;f__Lactobacillaceae;g__Lactobacillus;s__	taxonomic classification defined by topology and ANI	topological placement and ANI have congruent species assignments
GCF_004361445.1	Lactobacillus crispatus	RL27	Lactobacillus crispatus	Species	510	285	105307	2521945	36.84	25350	99.03	1.01	0	Homo sapiens	mucosa of vagina [UBERON:0004983]	Netherlands: Amsterdam	52.3625 N 4.9087 E	2012-06-01	N/A	47770	cellular organisms; Bacteria; Terrabacteria group; Firmicutes; Bacilli; Lactobacillales; Lactobacillaceae; Lactobacillus; Lactobacillus crispatus	131567 2 1783272 1239 91061 186826 33958 1578 47770	SAMN07213207	PRJNA390079	Scaffold		NKKW01	2473	2019-03-22T00:00:00Z	ftp://ftp.ncbi.nlm.nih.gov/genomes/all/GCF/004/361/445/GCF_004361445.1_ASM436144v1	WGS;RefSeq	BioProject:PRJNA224116;BioSample:SAMN07213207;Assembly:GCF_004361445.1	{'mol_type': ['genomic DNA'], 'strain': ['RL27'], 'collection_date': ['01-Jun-2012'], 'country': ['Netherlands: Amsterdam'], 'isolation_source': ['mucosa of vagina [UBERON:0004983]'], 'db_xref': ['taxon:47770'], 'host': ['Homo sapiens'], 'organism': ['Lactobacillus crispatus'], 'lat_lon': ['52.3625 N 4.9087 E']}	{'journal': 'Submitted (20-JUN-2017) Microbiology and Systems Biology, TNO, Utrechtseweg 48, Zeist 3704 HE, Netherlands', 'title': 'Direct Submission', 'pubmed_id': '', 'authors': 'Swanenburg,J. and Kort,R.'}	['"Eubacterium crispatum" Brygoo and Aladame 1953;authority', 'Eubacterium crispatum;synonym', 'Lactobacillus crispatus (Brygoo and Aladame 1953) Moore and Holdeman 1970 (Approved Lists) emend. Cato et al. 1983;authority']	d__Bacteria;p__Firmicutes;c__Bacilli;o__Lactobacillales;f__Lactobacillaceae;g__Lactobacillus;s__Lactobacillus crispatus	GCF_002088015.1	95	d__Bacteria;p__Firmicutes;c__Bacilli;o__Lactobacillales;f__Lactobacillaceae;g__Lactobacillus;s__Lactobacillus crispatus	97.63	0.8	GCF_002088015.1	95	d__Bacteria;p__Firmicutes;c__Bacilli;o__Lactobacillales;f__Lactobacillaceae;g__Lactobacillus;s__Lactobacillus crispatus	97.63	0.8	d__Bacteria;p__Firmicutes;c__Bacilli;o__Lactobacillales;f__Lactobacillaceae;g__Lactobacillus;s__	taxonomic classification defined by topology and ANI	topological placement and ANI have congruent species assignments
GCF_004361455.1	Lactobacillus crispatus	RL30	Lactobacillus crispatus	Species	407	237	114482	2267968	36.76	23952	99.03	0.09	0	Homo sapiens	mucosa of vagina [UBERON:0004983]	Netherlands: Amsterdam	52.3625 N 4.9087 E	2012-06-01	N/A	47770	cellular organisms; Bacteria; Terrabacteria group; Firmicutes; Bacilli; Lactobacillales; Lactobacillaceae; Lactobacillus; Lactobacillus crispatus	131567 2 1783272 1239 91061 186826 33958 1578 47770	SAMN07213210	PRJNA390079	Contig		NKKT01	2223	2019-03-22T00:00:00Z	ftp://ftp.ncbi.nlm.nih.gov/genomes/all/GCF/004/361/455/GCF_004361455.1_ASM436145v1	WGS;RefSeq	BioProject:PRJNA224116;BioSample:SAMN07213210;Assembly:GCF_004361455.1	{'mol_type': ['genomic DNA'], 'strain': ['RL30'], 'collection_date': ['01-Jun-2012'], 'country': ['Netherlands: Amsterdam'], 'isolation_source': ['mucosa of vagina [UBERON:0004983]'], 'db_xref': ['taxon:47770'], 'host': ['Homo sapiens'], 'organism': ['Lactobacillus crispatus'], 'lat_lon': ['52.3625 N 4.9087 E']}	{'journal': 'Submitted (20-JUN-2017) Microbiology and Systems Biology, TNO, Utrechtseweg 48, Zeist 3704 HE, Netherlands', 'title': 'Direct Submission', 'pubmed_id': '', 'authors': 'Swanenburg,J. and Kort,R.'}	['"Eubacterium crispatum" Brygoo and Aladame 1953;authority', 'Eubacterium crispatum;synonym', 'Lactobacillus crispatus (Brygoo and Aladame 1953) Moore and Holdeman 1970 (Approved Lists) emend. Cato et al. 1983;authority']	d__Bacteria;p__Firmicutes;c__Bacilli;o__Lactobacillales;f__Lactobacillaceae;g__Lactobacillus;s__Lactobacillus crispatus	GCF_002088015.1	95	d__Bacteria;p__Firmicutes;c__Bacilli;o__Lactobacillales;f__Lactobacillaceae;g__Lactobacillus;s__Lactobacillus crispatus	97.71	0.79	GCF_002088015.1	95	d__Bacteria;p__Firmicutes;c__Bacilli;o__Lactobacillales;f__Lactobacillaceae;g__Lactobacillus;s__Lactobacillus crispatus	97.71	0.79	d__Bacteria;p__Firmicutes;c__Bacilli;o__Lactobacillales;f__Lactobacillaceae;g__Lactobacillus;s__	taxonomic classification defined by topology and ANI	topological placement and ANI have congruent species assignments
GCF_004361465.1	Lactobacillus crispatus	RL25	Lactobacillus crispatus	Species	313	231	140783	2320657	36.84	20887	99.03	1.07	0	Homo sapiens	mucosa of vagina [UBERON:0004983]	Netherlands: Amsterdam	52.3625 N 4.9087 E	2012-06-01	N/A	47770	cellular organisms; Bacteria; Terrabacteria group; Firmicutes; Bacilli; Lactobacillales; Lactobacillaceae; Lactobacillus; Lactobacillus crispatus	131567 2 1783272 1239 91061 186826 33958 1578 47770	SAMN07213205	PRJNA390079	Scaffold		NKKY01	2239	2019-03-22T00:00:00Z	ftp://ftp.ncbi.nlm.nih.gov/genomes/all/GCF/004/361/465/GCF_004361465.1_ASM436146v1	WGS;RefSeq	BioProject:PRJNA224116;BioSample:SAMN07213205;Assembly:GCF_004361465.1	{'mol_type': ['genomic DNA'], 'strain': ['RL25'], 'collection_date': ['01-Jun-2012'], 'country': ['Netherlands: Amsterdam'], 'isolation_source': ['mucosa of vagina [UBERON:0004983]'], 'db_xref': ['taxon:47770'], 'host': ['Homo sapiens'], 'organism': ['Lactobacillus crispatus'], 'lat_lon': ['52.3625 N 4.9087 E']}	{'journal': 'Submitted (20-JUN-2017) Microbiology and Systems Biology, TNO, Utrechtseweg 48, Zeist 3704 HE, Netherlands', 'title': 'Direct Submission', 'pubmed_id': '', 'authors': 'Swanenburg,J. and Kort,R.'}	['"Eubacterium crispatum" Brygoo and Aladame 1953;authority', 'Eubacterium crispatum;synonym', 'Lactobacillus crispatus (Brygoo and Aladame 1953) Moore and Holdeman 1970 (Approved Lists) emend. Cato et al. 1983;authority']	d__Bacteria;p__Firmicutes;c__Bacilli;o__Lactobacillales;f__Lactobacillaceae;g__Lactobacillus;s__Lactobacillus crispatus	GCF_002088015.1	95	d__Bacteria;p__Firmicutes;c__Bacilli;o__Lactobacillales;f__Lactobacillaceae;g__Lactobacillus;s__Lactobacillus crispatus	97.72	0.76	GCF_002088015.1	95	d__Bacteria;p__Firmicutes;c__Bacilli;o__Lactobacillales;f__Lactobacillaceae;g__Lactobacillus;s__Lactobacillus crispatus	97.72	0.76	d__Bacteria;p__Firmicutes;c__Bacilli;o__Lactobacillales;f__Lactobacillaceae;g__Lactobacillus;s__	taxonomic classification defined by topology and ANI	topological placement and ANI have congruent species assignments
GCF_004361475.1	Lactobacillus crispatus	RL23	Lactobacillus crispatus	Species	306	231	114826	2302977	36.84	19430	99.03	1.07	0	Homo sapiens	mucosa of vagina [UBERON:0004983]	Netherlands: Amsterdam	52.3625 N 4.9087 E	2012-06-01	N/A	47770	cellular organisms; Bacteria; Terrabacteria group; Firmicutes; Bacilli; Lactobacillales; Lactobacillaceae; Lactobacillus; Lactobacillus crispatus	131567 2 1783272 1239 91061 186826 33958 1578 47770	SAMN07213203	PRJNA390079	Contig		NKLA01	2198	2019-03-22T00:00:00Z	ftp://ftp.ncbi.nlm.nih.gov/genomes/all/GCF/004/361/475/GCF_004361475.1_ASM436147v1	WGS;RefSeq	BioProject:PRJNA224116;BioSample:SAMN07213203;Assembly:GCF_004361475.1	{'mol_type': ['genomic DNA'], 'strain': ['RL23'], 'collection_date': ['01-Jun-2012'], 'country': ['Netherlands: Amsterdam'], 'isolation_source': ['mucosa of vagina [UBERON:0004983]'], 'db_xref': ['taxon:47770'], 'host': ['Homo sapiens'], 'organism': ['Lactobacillus crispatus'], 'lat_lon': ['52.3625 N 4.9087 E']}	{'journal': 'Submitted (20-JUN-2017) Microbiology and Systems Biology, TNO, Utrechtseweg 48, Zeist 3704 HE, Netherlands', 'title': 'Direct Submission', 'pubmed_id': '', 'authors': 'Swanenburg,J. and Kort,R.'}	['"Eubacterium crispatum" Brygoo and Aladame 1953;authority', 'Eubacterium crispatum;synonym', 'Lactobacillus crispatus (Brygoo and Aladame 1953) Moore and Holdeman 1970 (Approved Lists) emend. Cato et al. 1983;authority']	d__Bacteria;p__Firmicutes;c__Bacilli;o__Lactobacillales;f__Lactobacillaceae;g__Lactobacillus;s__Lactobacillus crispatus	GCF_002088015.1	95	d__Bacteria;p__Firmicutes;c__Bacilli;o__Lactobacillales;f__Lactobacillaceae;g__Lactobacillus;s__Lactobacillus crispatus	97.8	0.76	GCF_002088015.1	95	d__Bacteria;p__Firmicutes;c__Bacilli;o__Lactobacillales;f__Lactobacillaceae;g__Lactobacillus;s__Lactobacillus crispatus	97.8	0.76	d__Bacteria;p__Firmicutes;c__Bacilli;o__Lactobacillales;f__Lactobacillaceae;g__Lactobacillus;s__	taxonomic classification defined by topology and ANI	topological placement and ANI have congruent species assignments
GCF_004361515.1	Lactobacillus crispatus	RL20	Lactobacillus crispatus	Species	359	268	81431	2408969	36.47	17568	99.03	1.02	0	Homo sapiens	mucosa of vagina [UBERON:0004983]	Netherlands: Amsterdam	52.3625 N 4.9087 E	2012-06-01	N/A	47770	cellular organisms; Bacteria; Terrabacteria group; Firmicutes; Bacilli; Lactobacillales; Lactobacillaceae; Lactobacillus; Lactobacillus crispatus	131567 2 1783272 1239 91061 186826 33958 1578 47770	SAMN07213200	PRJNA390079	Scaffold		NKLC01	2282	2019-03-22T00:00:00Z	ftp://ftp.ncbi.nlm.nih.gov/genomes/all/GCF/004/361/515/GCF_004361515.1_ASM436151v1	WGS;RefSeq	BioProject:PRJNA224116;BioSample:SAMN07213200;Assembly:GCF_004361515.1	{'mol_type': ['genomic DNA'], 'strain': ['RL20'], 'collection_date': ['01-Jun-2012'], 'country': ['Netherlands: Amsterdam'], 'isolation_source': ['mucosa of vagina [UBERON:0004983]'], 'db_xref': ['taxon:47770'], 'host': ['Homo sapiens'], 'organism': ['Lactobacillus crispatus'], 'lat_lon': ['52.3625 N 4.9087 E']}	{'journal': 'Submitted (20-JUN-2017) Microbiology and Systems Biology, TNO, Utrechtseweg 48, Zeist 3704 HE, Netherlands', 'title': 'Direct Submission', 'pubmed_id': '', 'authors': 'Swanenburg,J. and Kort,R.'}	['"Eubacterium crispatum" Brygoo and Aladame 1953;authority', 'Eubacterium crispatum;synonym', 'Lactobacillus crispatus (Brygoo and Aladame 1953) Moore and Holdeman 1970 (Approved Lists) emend. Cato et al. 1983;authority']	d__Bacteria;p__Firmicutes;c__Bacilli;o__Lactobacillales;f__Lactobacillaceae;g__Lactobacillus;s__Lactobacillus crispatus	GCF_002088015.1	95	d__Bacteria;p__Firmicutes;c__Bacilli;o__Lactobacillales;f__Lactobacillaceae;g__Lactobacillus;s__Lactobacillus crispatus	97.7	0.77	GCF_002088015.1	95	d__Bacteria;p__Firmicutes;c__Bacilli;o__Lactobacillales;f__Lactobacillaceae;g__Lactobacillus;s__Lactobacillus crispatus	97.7	0.77	d__Bacteria;p__Firmicutes;c__Bacilli;o__Lactobacillales;f__Lactobacillaceae;g__Lactobacillus;s__	taxonomic classification defined by topology and ANI	topological placement and ANI have congruent species assignments
GCF_004361545.1	Lactobacillus crispatus	RL16	Lactobacillus crispatus	Species	350	256	103356	2564794	36.49	22339	99.03	1.43	0	Homo sapiens	mucosa of vagina [UBERON:0004983]	Netherlands: Amsterdam	52.3625 N 4.9087 E	2012-06-01	N/A	47770	cellular organisms; Bacteria; Terrabacteria group; Firmicutes; Bacilli; Lactobacillales; Lactobacillaceae; Lactobacillus; Lactobacillus crispatus	131567 2 1783272 1239 91061 186826 33958 1578 47770	SAMN07213197	PRJNA390079	Contig		NKLF01	2483	2019-03-22T00:00:00Z	ftp://ftp.ncbi.nlm.nih.gov/genomes/all/GCF/004/361/545/GCF_004361545.1_ASM436154v1	WGS;RefSeq	BioProject:PRJNA224116;BioSample:SAMN07213197;Assembly:GCF_004361545.1	{'mol_type': ['genomic DNA'], 'strain': ['RL16'], 'collection_date': ['01-Jun-2012'], 'country': ['Netherlands: Amsterdam'], 'isolation_source': ['mucosa of vagina [UBERON:0004983]'], 'db_xref': ['taxon:47770'], 'host': ['Homo sapiens'], 'organism': ['Lactobacillus crispatus'], 'lat_lon': ['52.3625 N 4.9087 E']}	{'journal': 'Submitted (20-JUN-2017) Microbiology and Systems Biology, TNO, Utrechtseweg 48, Zeist 3704 HE, Netherlands', 'title': 'Direct Submission', 'pubmed_id': '', 'authors': 'Swanenburg,J. and Kort,R.'}	['"Eubacterium crispatum" Brygoo and Aladame 1953;authority', 'Eubacterium crispatum;synonym', 'Lactobacillus crispatus (Brygoo and Aladame 1953) Moore and Holdeman 1970 (Approved Lists) emend. Cato et al. 1983;authority']	d__Bacteria;p__Firmicutes;c__Bacilli;o__Lactobacillales;f__Lactobacillaceae;g__Lactobacillus;s__Lactobacillus crispatus	GCF_002088015.1	95	d__Bacteria;p__Firmicutes;c__Bacilli;o__Lactobacillales;f__Lactobacillaceae;g__Lactobacillus;s__Lactobacillus crispatus	97.67	0.8	GCF_002088015.1	95	d__Bacteria;p__Firmicutes;c__Bacilli;o__Lactobacillales;f__Lactobacillaceae;g__Lactobacillus;s__Lactobacillus crispatus	97.67	0.8	d__Bacteria;p__Firmicutes;c__Bacilli;o__Lactobacillales;f__Lactobacillaceae;g__Lactobacillus;s__	taxonomic classification defined by topology and ANI	topological placement and ANI have congruent species assignments
GCF_004361555.1	Lactobacillus crispatus	RL14	Lactobacillus crispatus	Species	375	282	74214	2575393	36.76	19742	99.03	1.07	0	Homo sapiens	mucosa of vagina [UBERON:0004983]	Netherlands: Amsterdam	52.3625 N 4.9087 E	2012-06-01	N/A	47770	cellular organisms; Bacteria; Terrabacteria group; Firmicutes; Bacilli; Lactobacillales; Lactobacillaceae; Lactobacillus; Lactobacillus crispatus	131567 2 1783272 1239 91061 186826 33958 1578 47770	SAMN07213195	PRJNA390079	Scaffold		NKLH01	2502	2019-03-22T00:00:00Z	ftp://ftp.ncbi.nlm.nih.gov/genomes/all/GCF/004/361/555/GCF_004361555.1_ASM436155v1	WGS;RefSeq	BioProject:PRJNA224116;BioSample:SAMN07213195;Assembly:GCF_004361555.1	{'mol_type': ['genomic DNA'], 'strain': ['RL14'], 'collection_date': ['01-Jun-2012'], 'country': ['Netherlands: Amsterdam'], 'isolation_source': ['mucosa of vagina [UBERON:0004983]'], 'db_xref': ['taxon:47770'], 'host': ['Homo sapiens'], 'organism': ['Lactobacillus crispatus'], 'lat_lon': ['52.3625 N 4.9087 E']}	{'journal': 'Submitted (20-JUN-2017) Microbiology and Systems Biology, TNO, Utrechtseweg 48, Zeist 3704 HE, Netherlands', 'title': 'Direct Submission', 'pubmed_id': '', 'authors': 'Swanenburg,J. and Kort,R.'}	['"Eubacterium crispatum" Brygoo and Aladame 1953;authority', 'Eubacterium crispatum;synonym', 'Lactobacillus crispatus (Brygoo and Aladame 1953) Moore and Holdeman 1970 (Approved Lists) emend. Cato et al. 1983;authority']	d__Bacteria;p__Firmicutes;c__Bacilli;o__Lactobacillales;f__Lactobacillaceae;g__Lactobacillus;s__Lactobacillus crispatus	GCF_002088015.1	95	d__Bacteria;p__Firmicutes;c__Bacilli;o__Lactobacillales;f__Lactobacillaceae;g__Lactobacillus;s__Lactobacillus crispatus	97.65	0.79	GCF_002088015.1	95	d__Bacteria;p__Firmicutes;c__Bacilli;o__Lactobacillales;f__Lactobacillaceae;g__Lactobacillus;s__Lactobacillus crispatus	97.65	0.79	d__Bacteria;p__Firmicutes;c__Bacilli;o__Lactobacillales;f__Lactobacillaceae;g__Lactobacillus;s__	taxonomic classification defined by topology and ANI	topological placement and ANI have congruent species assignments
GCF_004361565.1	Lactobacillus crispatus	RL10	Lactobacillus crispatus	Species	297	220	95926	2286726	36.91	21574	98.81	0.09	0	Homo sapiens	mucosa of vagina [UBERON:0004983]	Netherlands: Amsterdam	52.3625 N 4.9087 E	2012-06-01	N/A	47770	cellular organisms; Bacteria; Terrabacteria group; Firmicutes; Bacilli; Lactobacillales; Lactobacillaceae; Lactobacillus; Lactobacillus crispatus	131567 2 1783272 1239 91061 186826 33958 1578 47770	SAMN07213192	PRJNA390079	Scaffold		NKLK01	2204	2019-03-22T00:00:00Z	ftp://ftp.ncbi.nlm.nih.gov/genomes/all/GCF/004/361/565/GCF_004361565.1_ASM436156v1	WGS;RefSeq	BioProject:PRJNA224116;BioSample:SAMN07213192;Assembly:GCF_004361565.1	{'mol_type': ['genomic DNA'], 'strain': ['RL10'], 'collection_date': ['01-Jun-2012'], 'country': ['Netherlands: Amsterdam'], 'isolation_source': ['mucosa of vagina [UBERON:0004983]'], 'db_xref': ['taxon:47770'], 'host': ['Homo sapiens'], 'organism': ['Lactobacillus crispatus'], 'lat_lon': ['52.3625 N 4.9087 E']}	{'journal': 'Submitted (20-JUN-2017) Microbiology and Systems Biology, TNO, Utrechtseweg 48, Zeist 3704 HE, Netherlands', 'title': 'Direct Submission', 'pubmed_id': '', 'authors': 'Swanenburg,J. and Kort,R.'}	['"Eubacterium crispatum" Brygoo and Aladame 1953;authority', 'Eubacterium crispatum;synonym', 'Lactobacillus crispatus (Brygoo and Aladame 1953) Moore and Holdeman 1970 (Approved Lists) emend. Cato et al. 1983;authority']	d__Bacteria;p__Firmicutes;c__Bacilli;o__Lactobacillales;f__Lactobacillaceae;g__Lactobacillus;s__Lactobacillus crispatus	GCF_002088015.1	95	d__Bacteria;p__Firmicutes;c__Bacilli;o__Lactobacillales;f__Lactobacillaceae;g__Lactobacillus;s__Lactobacillus crispatus	97.55	0.8	GCF_002088015.1	95	d__Bacteria;p__Firmicutes;c__Bacilli;o__Lactobacillales;f__Lactobacillaceae;g__Lactobacillus;s__Lactobacillus crispatus	97.55	0.8	d__Bacteria;p__Firmicutes;c__Bacilli;o__Lactobacillales;f__Lactobacillaceae;g__Lactobacillus;s__	taxonomic classification defined by topology and ANI	topological placement and ANI have congruent species assignments
GCF_004361575.1	Lactobacillus crispatus	RL09	Lactobacillus crispatus	Species	289	206	87308	2245058	36.83	22427	99.03	0.09	0	Homo sapiens	mucosa of vagina [UBERON:0004983]	Netherlands: Amsterdam	52.3625 N 4.9087 E	2012-06-01	N/A	47770	cellular organisms; Bacteria; Terrabacteria group; Firmicutes; Bacilli; Lactobacillales; Lactobacillaceae; Lactobacillus; Lactobacillus crispatus	131567 2 1783272 1239 91061 186826 33958 1578 47770	SAMN07213191	PRJNA390079	Scaffold		NKLL01	2144	2019-03-22T00:00:00Z	ftp://ftp.ncbi.nlm.nih.gov/genomes/all/GCF/004/361/575/GCF_004361575.1_ASM436157v1	WGS;RefSeq	BioProject:PRJNA224116;BioSample:SAMN07213191;Assembly:GCF_004361575.1	{'mol_type': ['genomic DNA'], 'strain': ['RL09'], 'collection_date': ['01-Jun-2012'], 'country': ['Netherlands: Amsterdam'], 'isolation_source': ['mucosa of vagina [UBERON:0004983]'], 'db_xref': ['taxon:47770'], 'host': ['Homo sapiens'], 'organism': ['Lactobacillus crispatus'], 'lat_lon': ['52.3625 N 4.9087 E']}	{'journal': 'Submitted (20-JUN-2017) Microbiology and Systems Biology, TNO, Utrechtseweg 48, Zeist 3704 HE, Netherlands', 'title': 'Direct Submission', 'pubmed_id': '', 'authors': 'Swanenburg,J. and Kort,R.'}	['"Eubacterium crispatum" Brygoo and Aladame 1953;authority', 'Eubacterium crispatum;synonym', 'Lactobacillus crispatus (Brygoo and Aladame 1953) Moore and Holdeman 1970 (Approved Lists) emend. Cato et al. 1983;authority']	d__Bacteria;p__Firmicutes;c__Bacilli;o__Lactobacillales;f__Lactobacillaceae;g__Lactobacillus;s__Lactobacillus crispatus	GCF_002088015.1	95	d__Bacteria;p__Firmicutes;c__Bacilli;o__Lactobacillales;f__Lactobacillaceae;g__Lactobacillus;s__Lactobacillus crispatus	97.55	0.82	GCF_002088015.1	95	d__Bacteria;p__Firmicutes;c__Bacilli;o__Lactobacillales;f__Lactobacillaceae;g__Lactobacillus;s__Lactobacillus crispatus	97.55	0.82	d__Bacteria;p__Firmicutes;c__Bacilli;o__Lactobacillales;f__Lactobacillaceae;g__Lactobacillus;s__	taxonomic classification defined by topology and ANI	topological placement and ANI have congruent species assignments
GCF_004361635.1	Lactobacillus crispatus	RL06	Lactobacillus crispatus	Species	371	292	59465	2160618	36.92	15961	99.03	0.19	50	Homo sapiens	mucosa of vagina [UBERON:0004983]	Netherlands: Amsterdam	52.3625 N 4.9087 E	2012-06-01	N/A	47770	cellular organisms; Bacteria; Terrabacteria group; Firmicutes; Bacilli; Lactobacillales; Lactobacillaceae; Lactobacillus; Lactobacillus crispatus	131567 2 1783272 1239 91061 186826 33958 1578 47770	SAMN07213188	PRJNA390079	Contig		NKLO01	2071	2019-03-22T00:00:00Z	ftp://ftp.ncbi.nlm.nih.gov/genomes/all/GCF/004/361/635/GCF_004361635.1_ASM436163v1	WGS;RefSeq	BioProject:PRJNA224116;BioSample:SAMN07213188;Assembly:GCF_004361635.1	{'mol_type': ['genomic DNA'], 'strain': ['RL06'], 'collection_date': ['01-Jun-2012'], 'country': ['Netherlands: Amsterdam'], 'isolation_source': ['mucosa of vagina [UBERON:0004983]'], 'db_xref': ['taxon:47770'], 'host': ['Homo sapiens'], 'organism': ['Lactobacillus crispatus'], 'lat_lon': ['52.3625 N 4.9087 E']}	{'journal': 'Submitted (20-JUN-2017) Microbiology and Systems Biology, TNO, Utrechtseweg 48, Zeist 3704 HE, Netherlands', 'title': 'Direct Submission', 'pubmed_id': '', 'authors': 'Swanenburg,J. and Kort,R.'}	['"Eubacterium crispatum" Brygoo and Aladame 1953;authority', 'Eubacterium crispatum;synonym', 'Lactobacillus crispatus (Brygoo and Aladame 1953) Moore and Holdeman 1970 (Approved Lists) emend. Cato et al. 1983;authority']	d__Bacteria;p__Firmicutes;c__Bacilli;o__Lactobacillales;f__Lactobacillaceae;g__Lactobacillus;s__Lactobacillus crispatus	GCF_002088015.1	95	d__Bacteria;p__Firmicutes;c__Bacilli;o__Lactobacillales;f__Lactobacillaceae;g__Lactobacillus;s__Lactobacillus crispatus	97.59	0.78	GCF_002088015.1	95	d__Bacteria;p__Firmicutes;c__Bacilli;o__Lactobacillales;f__Lactobacillaceae;g__Lactobacillus;s__Lactobacillus crispatus	97.59	0.78	d__Bacteria;p__Firmicutes;c__Bacilli;o__Lactobacillales;f__Lactobacillaceae;g__Lactobacillus;s__	taxonomic classification defined by topology and ANI	topological placement and ANI have congruent species assignments
GCF_004681235.1	Lactobacillus crispatus	V4	Lactobacillus crispatus	Species	252	219	102546	2081998	37.03	18815	99.03	0.09	0	Homo sapiens	vaginal swab	France	N/A	2021-01-18	N/A	47770	cellular organisms; Bacteria; Terrabacteria group; Firmicutes; Bacilli; Lactobacillales; Lactobacillaceae; Lactobacillus; Lactobacillus crispatus	131567 2 1783272 1239 91061 186826 33958 1578 47770	SAMN11316524	PRJNA530397	Contig		SRLG01	2004	2019-04-05T00:00:00Z	ftp://ftp.ncbi.nlm.nih.gov/genomes/all/GCF/004/681/235/GCF_004681235.1_ASM468123v1	WGS;RefSeq	BioProject:PRJNA224116;BioSample:SAMN11316524;Assembly:GCF_004681235.1	{'mol_type': ['genomic DNA'], 'strain': ['V4'], 'collection_date': ['2018-01'], 'country': ['France'], 'isolation_source': ['vaginal swab'], 'db_xref': ['taxon:47770'], 'host': ['Homo sapiens'], 'organism': ['Lactobacillus crispatus']}	{'journal': 'Unpublished', 'title': 'Draft genome sequence of Lactobacillus crispatus strain V4 isolated from a vaginal swab from a young healthy nonpregnant French woman', 'pubmed_id': '', 'authors': 'Clabaut,M., Boukerb,A.M., Racine,P.-J., Pichon,C., Kremser,C., Queiroz,A., Karsybayeva,M., Redziniak,G., Chevalier,S. and Feuilloley,M.G.J.'}	['"Eubacterium crispatum" Brygoo and Aladame 1953;authority', 'Eubacterium crispatum;synonym', 'Lactobacillus crispatus (Brygoo and Aladame 1953) Moore and Holdeman 1970 (Approved Lists) emend. Cato et al. 1983;authority']	d__Bacteria;p__Firmicutes;c__Bacilli;o__Lactobacillales;f__Lactobacillaceae;g__Lactobacillus;s__Lactobacillus crispatus	GCF_002088015.1	95	d__Bacteria;p__Firmicutes;c__Bacilli;o__Lactobacillales;f__Lactobacillaceae;g__Lactobacillus;s__Lactobacillus crispatus	97.72	0.79	GCF_002088015.1	95	d__Bacteria;p__Firmicutes;c__Bacilli;o__Lactobacillales;f__Lactobacillaceae;g__Lactobacillus;s__Lactobacillus crispatus	97.72	0.79	d__Bacteria;p__Firmicutes;c__Bacilli;o__Lactobacillales;f__Lactobacillaceae;g__Lactobacillus;s__	taxonomic classification defined by topology and ANI	topological placement and ANI have congruent species assignments
GCF_008079315.1	Lactobacillus crispatus	CIP 104459	Lactobacillus crispatus	Species	124	109	111106	1988721	36.8	38667	99.03	0.09	0	Homo sapiens	vaginal swab	France: Lyon	N/A	1955-01-01	N/A	47770	cellular organisms; Bacteria; Terrabacteria group; Firmicutes; Bacilli; Lactobacillales; Lactobacillaceae; Lactobacillus; Lactobacillus crispatus	131567 2 1783272 1239 91061 186826 33958 1578 47770	SAMN12395213	PRJNA557339	Contig		VOMA01	1885	2019-08-23T00:00:00Z	ftp://ftp.ncbi.nlm.nih.gov/genomes/all/GCF/008/079/315/GCF_008079315	WGS;RefSeq	BioProject:PRJNA224116;BioSample:SAMN12395213;Assembly:GCF_008079315.1	{'organism': ['Lactobacillus crispatus'], 'mol_type': ['genomic DNA'], 'strain': ['CIP 104459'], 'isolation_source': ['vaginal swab'], 'host': ['Homo sapiens'], 'db_xref': ['taxon:47770'], 'country': ['France: Lyon'], 'collection_date': ['1955-01']}	{'authors': 'Clabaut,M., Boukerb,A.M., Racine,P.-J., Pichon,C., Kremser,C., Queiroz,A., Karsybayeva,M., Redziniak,G., Chevalier,S. and Feuilloley,M.G.J.', 'title': 'Draft genome sequence of Lactobacillus crispatus reference strain CIP104459 isolated from vaginal swab', 'journal': 'Unpublished', 'pubmed_id': ''}	['"Eubacterium crispatum" Brygoo and Aladame 1953;authority', 'Eubacterium crispatum;synonym', 'Lactobacillus crispatus (Brygoo and Aladame 1953) Moore and Holdeman 1970 (Approved Lists) emend. Cato et al. 1983;authority']	d__Bacteria;p__Firmicutes;c__Bacilli;o__Lactobacillales;f__Lactobacillaceae;g__Lactobacillus;s__Lactobacillus crispatus	GCF_002088015.1	95	d__Bacteria;p__Firmicutes;c__Bacilli;o__Lactobacillales;f__Lactobacillaceae;g__Lactobacillus;s__Lactobacillus crispatus	98.25	0.84	GCF_002088015.1	95	d__Bacteria;p__Firmicutes;c__Bacilli;o__Lactobacillales;f__Lactobacillaceae;g__Lactobacillus;s__Lactobacillus crispatus	98.25	0.84	d__Bacteria;p__Firmicutes;c__Bacilli;o__Lactobacillales;f__Lactobacillaceae;g__Lactobacillus;s__	taxonomic classification defined by topology and ANI	topological placement and ANI have congruent species assignments
GCF_008868575.1	Lactobacillus crispatus	BIO6272	Lactobacillus crispatus	Species	190	151	118834	2050825	37	29581	99.03	0.09	0	Homo sapiens	vagina	N/A	N/A	N/A	N/A	47770	cellular organisms; Bacteria; Terrabacteria group; Firmicutes; Bacilli; Lactobacillales; Lactobacillaceae; Lactobacillus; Lactobacillus crispatus	131567 2 1783272 1239 91061 186826 33958 1578 47770	SAMN12856537	PRJNA574342	Contig		WBOB01	1926	2019-10-07T00:00:00Z	ftp://ftp.ncbi.nlm.nih.gov/genomes/all/GCF/008/868/575/GCF_008868575	WGS;RefSeq	BioProject:PRJNA224116;BioSample:SAMN12856537;Assembly:GCF_008868575.1	{'organism': ['Lactobacillus crispatus'], 'mol_type': ['genomic DNA'], 'submitter_seqid': ['Lactobacillus_crispatus_BIO6272_99'], 'strain': ['BIO6272'], 'isolation_source': ['vagina'], 'host': ['Homo sapiens'], 'db_xref': ['taxon:47770']}	{'authors': 'Jaomanjaka,F. and Blanc,P.', 'title': 'Investigation of probiotic properties of different lactic acid bacteria', 'journal': 'Unpublished', 'pubmed_id': ''}	['"Eubacterium crispatum" Brygoo and Aladame 1953;authority', 'Eubacterium crispatum;synonym', 'Lactobacillus crispatus (Brygoo and Aladame 1953) Moore and Holdeman 1970 (Approved Lists) emend. Cato et al. 1983;authority']	d__Bacteria;p__Firmicutes;c__Bacilli;o__Lactobacillales;f__Lactobacillaceae;g__Lactobacillus;s__Lactobacillus crispatus	GCF_002088015.1	95	d__Bacteria;p__Firmicutes;c__Bacilli;o__Lactobacillales;f__Lactobacillaceae;g__Lactobacillus;s__Lactobacillus crispatus	97.93	0.83	GCF_002088015.1	95	d__Bacteria;p__Firmicutes;c__Bacilli;o__Lactobacillales;f__Lactobacillaceae;g__Lactobacillus;s__Lactobacillus crispatus	97.93	0.83	d__Bacteria;p__Firmicutes;c__Bacilli;o__Lactobacillales;f__Lactobacillaceae;g__Lactobacillus;s__	taxonomic classification defined by topology and ANI	topological placement and ANI have congruent species assignments
GCF_009730275.1	Lactobacillus crispatus	FDAARGOS_743	Lactobacillus crispatus	Species	2	2	2373487	2386960	37.12	2373487	98.7	0.09	0	Homo sapiens	mid-vaginal wall	USA: VA	N/A	N/A	BEI Resources/American Type and Culture Collection (ATCC)	47770	cellular organisms; Bacteria; Terrabacteria group; Firmicutes; Bacilli; Lactobacillales; Lactobacillaceae; Lactobacillus; Lactobacillus crispatus	131567 2 1783272 1239 91061 186826 33958 1578 47770	SAMN11056458	PRJNA231221	Complete	chromosome:NZ_CP046311.1/CP046311.1; plasmid unnamed1:NZ_CP046312.1/CP046312.1		2184	2019-12-05T00:00:00Z	ftp://ftp.ncbi.nlm.nih.gov/genomes/all/GCF/009/730/275/GCF_009730275	RefSeq	BioProject:PRJNA224116;BioSample:SAMN11056458;Assembly:GCF_009730275.1	{'organism': ['Lactobacillus crispatus'], 'mol_type': ['genomic DNA'], 'strain': ['FDAARGOS_743'], 'isolation_source': ['mid-vaginal wall'], 'host': ['Homo sapiens'], 'culture_collection': ['FDA:FDAARGOS_743'], 'db_xref': ['taxon:47770'], 'plasmid': ['unnamed1'], 'country': ['USA: VA'], 'collected_by': ['BEI Resources/American Type and Culture Collection (ATCC)']}	{'authors': 'Bojja,K., Tallon,L., Sadzewicz,L., Vavikolanu,K., Mehta,A., Aluvathingal,J., Nadendla,S., Myers,T., Yan,Y. and Sichtig,H.', 'title': 'FDA dAtabase for Regulatory Grade micrObial Sequences (FDA-ARGOS): Supporting development and validation of Infectious Disease Dx tests', 'journal': 'Unpublished', 'pubmed_id': ''}	['"Eubacterium crispatum" Brygoo and Aladame 1953;authority', 'Eubacterium crispatum;synonym', 'Lactobacillus crispatus (Brygoo and Aladame 1953) Moore and Holdeman 1970 (Approved Lists) emend. Cato et al. 1983;authority']	d__Bacteria;p__Firmicutes;c__Bacilli;o__Lactobacillales;f__Lactobacillaceae;g__Lactobacillus;s__Lactobacillus crispatus	GCF_002088015.1	95	d__Bacteria;p__Firmicutes;c__Bacilli;o__Lactobacillales;f__Lactobacillaceae;g__Lactobacillus;s__Lactobacillus crispatus	97.55	0.87	GCF_002088015.1	95	d__Bacteria;p__Firmicutes;c__Bacilli;o__Lactobacillales;f__Lactobacillaceae;g__Lactobacillus;s__Lactobacillus crispatus	97.55	0.87	d__Bacteria;p__Firmicutes;c__Bacilli;o__Lactobacillales;f__Lactobacillaceae;g__Lactobacillus;s__	taxonomic classification defined by topology and ANI	topological placement and ANI have congruent species assignments
GCF_009857225.1	Lactobacillus crispatus	Indica1	Lactobacillus crispatus	Species	59	59	87794	1641433	37.33	33495	91.88	0.15	0	Homo sapiens	N/A	India	N/A	2016	N/A	47770	cellular organisms; Bacteria; Terrabacteria group; Firmicutes; Bacilli; Lactobacillales; Lactobacillaceae; Lactobacillus; Lactobacillus crispatus	131567 2 1783272 1239 91061 186826 33958 1578 47770	SAMN13738804	PRJNA599094	Contig		WWFE01	1567	2020-01-12T00:00:00Z	ftp://ftp.ncbi.nlm.nih.gov/genomes/all/GCF/009/857/225/GCF_009857225	WGS;RefSeq	BioProject:PRJNA224116;BioSample:SAMN13738804;Assembly:GCF_009857225.1	{'organism': ['Lactobacillus crispatus'], 'mol_type': ['genomic DNA'], 'submitter_seqid': ['sctg_0059_0001'], 'strain': ['Indica1'], 'host': ['Homo sapiens'], 'db_xref': ['taxon:47770'], 'country': ['India'], 'collection_date': ['2016']}	{'authors': 'Das,B., Ghosh,T.S., Kothidar,A., Gowtham,M.R., Mitra,R., Kshetrapal,P., Wadhwa,N., Thiruvengadam,R., Nair,G.B. and Bhatnagar,S.', 'title': 'Vaginal microbiome of pregnant Indian women: Insights into the genome of dominants Lactobacillus species', 'journal': 'Unpublished', 'pubmed_id': ''}	['"Eubacterium crispatum" Brygoo and Aladame 1953;authority', 'Eubacterium crispatum;synonym', 'Lactobacillus crispatus (Brygoo and Aladame 1953) Moore and Holdeman 1970 (Approved Lists) emend. Cato et al. 1983;authority']	d__Bacteria;p__Firmicutes;c__Bacilli;o__Lactobacillales;f__Lactobacillaceae;g__Lactobacillus;s__Lactobacillus crispatus	GCF_002088015.1	95	d__Bacteria;p__Firmicutes;c__Bacilli;o__Lactobacillales;f__Lactobacillaceae;g__Lactobacillus;s__Lactobacillus crispatus	97.85	0.81	GCF_002088015.1	95	d__Bacteria;p__Firmicutes;c__Bacilli;o__Lactobacillales;f__Lactobacillaceae;g__Lactobacillus;s__Lactobacillus crispatus	97.85	0.81	d__Bacteria;p__Firmicutes;c__Bacilli;o__Lactobacillales;f__Lactobacillaceae;g__Lactobacillus;s__	taxonomic classification defined by topology and ANI	topological placement and ANI have congruent species assignments
GCF_009857395.1	Lactobacillus crispatus	Indica2	Lactobacillus crispatus	Species	39	39	238218	2209487	36.49	153263	99.03	0.09	0	Homo sapiens	N/A	India	N/A	2016	N/A	47770	cellular organisms; Bacteria; Terrabacteria group; Firmicutes; Bacilli; Lactobacillales; Lactobacillaceae; Lactobacillus; Lactobacillus crispatus	131567 2 1783272 1239 91061 186826 33958 1578 47770	SAMN13743077	PRJNA599300	Contig		WWFF01	1983	2020-01-12T00:00:00Z	ftp://ftp.ncbi.nlm.nih.gov/genomes/all/GCF/009/857/395/GCF_009857395	WGS;RefSeq	BioProject:PRJNA224116;BioSample:SAMN13743077;Assembly:GCF_009857395.1	{'organism': ['Lactobacillus crispatus'], 'mol_type': ['genomic DNA'], 'submitter_seqid': ['contig_9'], 'strain': ['Indica2'], 'host': ['Homo sapiens'], 'db_xref': ['taxon:47770'], 'country': ['India'], 'collection_date': ['2016']}	{'authors': 'Das,B., Mehta,O., Ghosh,T.S., Kothidar,A., Gowtham,M.R., Mitra,R., Kshetrapal,P., Wadhwa,N., Thiruvengadam,R., Nair,G.B., Bhatnagar,S. and Pore,S.', 'title': 'Vaginal microbiome of pregnant Indian women: Insights into the genome of dominants Lactobacillus species', 'journal': 'Unpublished', 'pubmed_id': ''}	['"Eubacterium crispatum" Brygoo and Aladame 1953;authority', 'Eubacterium crispatum;synonym', 'Lactobacillus crispatus (Brygoo and Aladame 1953) Moore and Holdeman 1970 (Approved Lists) emend. Cato et al. 1983;authority']	d__Bacteria;p__Firmicutes;c__Bacilli;o__Lactobacillales;f__Lactobacillaceae;g__Lactobacillus;s__Lactobacillus crispatus	GCF_002088015.1	95	d__Bacteria;p__Firmicutes;c__Bacilli;o__Lactobacillales;f__Lactobacillaceae;g__Lactobacillus;s__Lactobacillus crispatus	97.96	0.89	GCF_002088015.1	95	d__Bacteria;p__Firmicutes;c__Bacilli;o__Lactobacillales;f__Lactobacillaceae;g__Lactobacillus;s__Lactobacillus crispatus	97.96	0.89	d__Bacteria;p__Firmicutes;c__Bacilli;o__Lactobacillales;f__Lactobacillaceae;g__Lactobacillus;s__	taxonomic classification defined by topology and ANI	topological placement and ANI have congruent species assignments
GCF_011029265.1	Lactobacillus crispatus	VA50-4AN	Lactobacillus crispatus	Species	245	176	131661	2187006	36.71	25648	99.03	0	0	Homo sapiens	vagina	Thailand: Khon Kean	N/A	2021-08-15	RCEID	47770	cellular organisms; Bacteria; Terrabacteria group; Firmicutes; Bacilli; Lactobacillales; Lactobacillaceae; Lactobacillus; Lactobacillus crispatus	131567 2 1783272 1239 91061 186826 33958 1578 47770	SAMN14087162	PRJNA604908	Contig		JAAJBO01	2073	2020-02-26T00:00:00Z	ftp://ftp.ncbi.nlm.nih.gov/genomes/all/GCF/011/029/265/GCF_011029265	WGS;RefSeq	BioProject:PRJNA224116;BioSample:SAMN14087162;Assembly:GCF_011029265.1	{'organism': ['Lactobacillus crispatus'], 'mol_type': ['genomic DNA'], 'submitter_seqid': ['NODE_9_length_46915_cov_81.642814'], 'strain': ['VA50-4AN'], 'isolation_source': ['vagina'], 'host': ['Homo sapiens'], 'db_xref': ['taxon:47770'], 'country': ['Thailand: Khon Kean'], 'collection_date': ['2015-08'], 'collected_by': ['RCEID']}	{'authors': 'Sirichoat,A., Florez,A.B., Vazquez,L., Buppasiri,P., Panya,M., Lulitanond,V. and Mayo,B.', 'title': 'Antibiotic susceptibility profiles of lactic acid bacteria isolated from the human vagina and genetic basis of atypical resistances', 'journal': 'Unpublished', 'pubmed_id': ''}	['"Eubacterium crispatum" Brygoo and Aladame 1953;authority', 'Eubacterium crispatum;synonym', 'Lactobacillus crispatus (Brygoo and Aladame 1953) Moore and Holdeman 1970 (Approved Lists) emend. Cato et al. 1983;authority']	d__Bacteria;p__Firmicutes;c__Bacilli;o__Lactobacillales;f__Lactobacillaceae;g__Lactobacillus;s__Lactobacillus crispatus	GCF_002088015.1	95	d__Bacteria;p__Firmicutes;c__Bacilli;o__Lactobacillales;f__Lactobacillaceae;g__Lactobacillus;s__Lactobacillus crispatus	97.59	0.81	GCF_002088015.1	95	d__Bacteria;p__Firmicutes;c__Bacilli;o__Lactobacillales;f__Lactobacillaceae;g__Lactobacillus;s__Lactobacillus crispatus	97.59	0.81	d__Bacteria;p__Firmicutes;c__Bacilli;o__Lactobacillales;f__Lactobacillaceae;g__Lactobacillus;s__	taxonomic classification defined by topology and ANI	topological placement and ANI have congruent species assignments
GCF_012030075.1	Lactobacillus crispatus	UMB1163	Lactobacillus crispatus	Species	151	151	100521	2384113	36.66	26484	97.73	3.7	0	Homo sapiens	N/A	USA: Maywood, IL	41.86 N 87.84 W	N/A	N/A	47770	cellular organisms; Bacteria; Terrabacteria group; Firmicutes; Bacilli; Lactobacillales; Lactobacillaceae; Lactobacillus; Lactobacillus crispatus	131567 2 1783272 1239 91061 186826 33958 1578 47770	SAMN14478482	PRJNA316969	Contig		JAAUWJ01	2291	2020-04-04T00:00:00Z	ftp://ftp.ncbi.nlm.nih.gov/genomes/all/GCF/012/030/075/GCF_012030075	WGS;RefSeq	BioProject:PRJNA224116;BioSample:SAMN14478482;Assembly:GCF_012030075.1	{'organism': ['Lactobacillus crispatus'], 'mol_type': ['genomic DNA'], 'submitter_seqid': ['NODE_9_length_45764_cov_10.691939'], 'strain': ['UMB1163'], 'host': ['Homo sapiens'], 'db_xref': ['taxon:47770'], 'country': ['USA: Maywood, IL'], 'lat_lon': ['41.86 N 87.84 W']}	{'authors': 'Miller-Ensminger,T., Wolfe,A.J. and Putonti,C.', 'title': 'Draft genome sequences of bacterial isolates from the female urobiome', 'journal': 'Unpublished', 'pubmed_id': ''}	['"Eubacterium crispatum" Brygoo and Aladame 1953;authority', 'Eubacterium crispatum;synonym', 'Lactobacillus crispatus (Brygoo and Aladame 1953) Moore and Holdeman 1970 (Approved Lists) emend. Cato et al. 1983;authority']	d__Bacteria;p__Firmicutes;c__Bacilli;o__Lactobacillales;f__Lactobacillaceae;g__Lactobacillus;s__Lactobacillus crispatus	GCF_002088015.1	95	d__Bacteria;p__Firmicutes;c__Bacilli;o__Lactobacillales;f__Lactobacillaceae;g__Lactobacillus;s__Lactobacillus crispatus	97.76	0.77	GCF_002088015.1	95	d__Bacteria;p__Firmicutes;c__Bacilli;o__Lactobacillales;f__Lactobacillaceae;g__Lactobacillus;s__Lactobacillus crispatus	97.76	0.77	d__Bacteria;p__Firmicutes;c__Bacilli;o__Lactobacillales;f__Lactobacillaceae;g__Lactobacillus;s__	taxonomic classification defined by topology and ANI	topological placement and ANI have congruent species assignments
GCF_014654865.1	Lactobacillus crispatus	BC5	Lactobacillus crispatus	Species	50	50	292991	2064185	36.71	104423	99.03	0.74	50	Homo sapiens	Vaginal sample	Italy: Bologna	N/A	2014	Dr. Beatrice Vitali	47770	cellular organisms; Bacteria; Terrabacteria group; Firmicutes; Bacilli; Lactobacillales; Lactobacillaceae; Lactobacillus; Lactobacillus crispatus	131567 2 1783272 1239 91061 186826 33958 1578 47770	SAMN13648610	PRJNA596958	Contig		WUBT01	1895	2020-09-18T00:00:00Z	ftp://ftp.ncbi.nlm.nih.gov/genomes/all/GCF/014/654/865/GCF_014654865.1_Biofab_BC5_1	WGS;RefSeq	BioProject:PRJNA224116;BioSample:SAMN13648610;Assembly:GCF_014654865.1	{'organism': ['Lactobacillus crispatus'], 'mol_type': ['genomic DNA'], 'submitter_seqid': ['scaffold9.1'], 'strain': ['BC5'], 'isolation_source': ['Vaginal sample'], 'host': ['Homo sapiens'], 'db_xref': ['taxon:47770'], 'country': ['Italy: Bologna'], 'collection_date': ['2014'], 'collected_by': ['Dr. Beatrice Vitali']}	{'authors': 'Costantini,P.E., Parolin,C., Stefano,F., Andrea,F., Beatrice,V. and Martina,C.', 'title': 'Genotypic and phenotypic characterization of Lactobacillus crispatus and Lactobacillus gasseri', 'journal': 'Unpublished', 'pubmed_id': ''}	['"Eubacterium crispatum" Brygoo and Aladame 1953;authority', 'Eubacterium crispatum;synonym', 'Lactobacillus crispatus (Brygoo and Aladame 1953) Moore and Holdeman 1970 (Approved Lists) emend. Cato et al. 1983;authority']	d__Bacteria;p__Firmicutes;c__Bacilli;o__Lactobacillales;f__Lactobacillaceae;g__Lactobacillus;s__Lactobacillus crispatus	GCF_002088015.1	95	d__Bacteria;p__Firmicutes;c__Bacilli;o__Lactobacillales;f__Lactobacillaceae;g__Lactobacillus;s__Lactobacillus crispatus	98.01	0.86	GCF_002088015.1	95	d__Bacteria;p__Firmicutes;c__Bacilli;o__Lactobacillales;f__Lactobacillaceae;g__Lactobacillus;s__Lactobacillus crispatus	98.01	0.86	d__Bacteria;p__Firmicutes;c__Bacilli;o__Lactobacillales;f__Lactobacillaceae;g__Lactobacillus;s__	taxonomic classification defined by topology and ANI	topological placement and ANI have congruent species assignments
GCF_015708055.1	Lactobacillus crispatus	CRI17	Lactobacillus crispatus	Species	79	74	141995	2382636	36.91	58032	99.03	0.46	0	Homo sapiens	vagina	Brazil	N/A	N/A	N/A	47770	cellular organisms; Bacteria; Terrabacteria group; Firmicutes; Bacilli; Lactobacillales; Lactobacillaceae; Lactobacillus; Lactobacillus crispatus	131567 2 1783272 1239 91061 186826 33958 1578 47770	SAMN14773342	PRJNA629338	Contig		JABERQ01	2210	2020-12-01T00:00:00Z	ftp://ftp.ncbi.nlm.nih.gov/genomes/all/GCF/015/708/055/GCF_015708055	WGS;RefSeq	BioProject:PRJNA224116;BioSample:SAMN14773342;Assembly:GCF_015708055.1	{'organism': ['Lactobacillus crispatus'], 'mol_type': ['genomic DNA'], 'submitter_seqid': ['LcB151_contig_9'], 'strain': ['CRI17'], 'isolation_source': ['vagina'], 'host': ['Homo sapiens'], 'db_xref': ['taxon:47770'], 'country': ['Brazil']}	{'authors': 'Viana,M.V.C., Almeida,M.O., Kato,R.B., Miranda,F.M., Carvalho,R.D.O., Drumond,M., Drummond,M.N., Brenig,B. and Azevedo,V.', 'title': 'Draft genome sequence of Lactobacillus crispatus strain CRI17, isolated from a healthy human vagina', 'journal': 'Unpublished', 'pubmed_id': ''}	['"Eubacterium crispatum" Brygoo and Aladame 1953;authority', 'Eubacterium crispatum;synonym', 'Lactobacillus crispatus (Brygoo and Aladame 1953) Moore and Holdeman 1970 (Approved Lists) emend. Cato et al. 1983;authority']	d__Bacteria;p__Firmicutes;c__Bacilli;o__Lactobacillales;f__Lactobacillaceae;g__Lactobacillus;s__Lactobacillus crispatus	GCF_002088015.1	95	d__Bacteria;p__Firmicutes;c__Bacilli;o__Lactobacillales;f__Lactobacillaceae;g__Lactobacillus;s__Lactobacillus crispatus	97.49	0.83	GCF_002088015.1	95	d__Bacteria;p__Firmicutes;c__Bacilli;o__Lactobacillales;f__Lactobacillaceae;g__Lactobacillus;s__Lactobacillus crispatus	97.49	0.83	d__Bacteria;p__Firmicutes;c__Bacilli;o__Lactobacillales;f__Lactobacillaceae;g__Lactobacillus;s__	taxonomic classification defined by topology and ANI	topological placement and ANI have congruent species assignments
GCF_015708065.1	Lactobacillus crispatus	CRI10	Lactobacillus crispatus	Species	65	62	234925	2417523	37.04	75243	99.03	0.09	0	Homo sapiens	vagina	Brazil	N/A	N/A	N/A	47770	cellular organisms; Bacteria; Terrabacteria group; Firmicutes; Bacilli; Lactobacillales; Lactobacillaceae; Lactobacillus; Lactobacillus crispatus	131567 2 1783272 1239 91061 186826 33958 1578 47770	SAMN14772552	PRJNA629338	Contig		JABERP01	2277	2020-12-01T00:00:00Z	ftp://ftp.ncbi.nlm.nih.gov/genomes/all/GCF/015/708/065/GCF_015708065	WGS;RefSeq	BioProject:PRJNA224116;BioSample:SAMN14772552;Assembly:GCF_015708065.1	{'organism': ['Lactobacillus crispatus'], 'mol_type': ['genomic DNA'], 'submitter_seqid': ['LcB146_contig_9'], 'strain': ['CRI10'], 'isolation_source': ['vagina'], 'host': ['Homo sapiens'], 'db_xref': ['taxon:47770'], 'country': ['Brazil']}	{'authors': 'Viana,M.V.C., Almeida,M.O., Kato,R.B., Miranda,F.M., Carvalho,R.D.O., Drumond,M., Brenig,B. and Azevedo,V.', 'title': 'Draft genome sequence of Lactobacillus crispatus strain CRI10, isolated from a healthy human vagina', 'journal': 'Unpublished', 'pubmed_id': ''}	['"Eubacterium crispatum" Brygoo and Aladame 1953;authority', 'Eubacterium crispatum;synonym', 'Lactobacillus crispatus (Brygoo and Aladame 1953) Moore and Holdeman 1970 (Approved Lists) emend. Cato et al. 1983;authority']	d__Bacteria;p__Firmicutes;c__Bacilli;o__Lactobacillales;f__Lactobacillaceae;g__Lactobacillus;s__Lactobacillus crispatus	GCF_002088015.1	95	d__Bacteria;p__Firmicutes;c__Bacilli;o__Lactobacillales;f__Lactobacillaceae;g__Lactobacillus;s__Lactobacillus crispatus	97.57	0.85	GCF_002088015.1	95	d__Bacteria;p__Firmicutes;c__Bacilli;o__Lactobacillales;f__Lactobacillaceae;g__Lactobacillus;s__Lactobacillus crispatus	97.57	0.85	d__Bacteria;p__Firmicutes;c__Bacilli;o__Lactobacillales;f__Lactobacillaceae;g__Lactobacillus;s__	taxonomic classification defined by topology and ANI	topological placement and ANI have congruent species assignments
GCF_015708075.1	Lactobacillus crispatus	CRI8	Lactobacillus crispatus	Species	65	61	249452	2328731	36.97	69313	99.03	0.19	0	Homo sapiens	vagina	Brazil	N/A	N/A	N/A	47770	cellular organisms; Bacteria; Terrabacteria group; Firmicutes; Bacilli; Lactobacillales; Lactobacillaceae; Lactobacillus; Lactobacillus crispatus	131567 2 1783272 1239 91061 186826 33958 1578 47770	SAMN14771635	PRJNA629338	Contig		JABERO01	2139	2020-12-01T00:00:00Z	ftp://ftp.ncbi.nlm.nih.gov/genomes/all/GCF/015/708/075/GCF_015708075	WGS;RefSeq	BioProject:PRJNA224116;BioSample:SAMN14771635;Assembly:GCF_015708075.1	{'organism': ['Lactobacillus crispatus'], 'mol_type': ['genomic DNA'], 'submitter_seqid': ['LcB144_contig_9'], 'strain': ['CRI8'], 'isolation_source': ['vagina'], 'host': ['Homo sapiens'], 'db_xref': ['taxon:47770'], 'country': ['Brazil']}	{'authors': 'Viana,M.V.C., Almeida,M.O., Kato,R.B., Miranda,F.M., Carvalho,R.D.O., Drumond,M., Brenig,B. and Azevedo,V.', 'title': 'Draft genome sequence of Lactobacillus crispatus strain CRI8, isolated from a healthy human vagina', 'journal': 'Unpublished', 'pubmed_id': ''}	['"Eubacterium crispatum" Brygoo and Aladame 1953;authority', 'Eubacterium crispatum;synonym', 'Lactobacillus crispatus (Brygoo and Aladame 1953) Moore and Holdeman 1970 (Approved Lists) emend. Cato et al. 1983;authority']	d__Bacteria;p__Firmicutes;c__Bacilli;o__Lactobacillales;f__Lactobacillaceae;g__Lactobacillus;s__Lactobacillus crispatus	GCF_002088015.1	95	d__Bacteria;p__Firmicutes;c__Bacilli;o__Lactobacillales;f__Lactobacillaceae;g__Lactobacillus;s__Lactobacillus crispatus	97.57	0.84	GCF_002088015.1	95	d__Bacteria;p__Firmicutes;c__Bacilli;o__Lactobacillales;f__Lactobacillaceae;g__Lactobacillus;s__Lactobacillus crispatus	97.57	0.84	d__Bacteria;p__Firmicutes;c__Bacilli;o__Lactobacillales;f__Lactobacillaceae;g__Lactobacillus;s__	taxonomic classification defined by topology and ANI	topological placement and ANI have congruent species assignments
GCF_015708105.1	Lactobacillus crispatus	CRI4	Lactobacillus crispatus	Species	100	99	146216	2375924	37.01	44691	99.03	4.64	95.45	Homo sapiens	vagina	Brazil	N/A	N/A	N/A	47770	cellular organisms; Bacteria; Terrabacteria group; Firmicutes; Bacilli; Lactobacillales; Lactobacillaceae; Lactobacillus; Lactobacillus crispatus	131567 2 1783272 1239 91061 186826 33958 1578 47770	SAMN14771428	PRJNA629338	Contig		JABERN01	2217	2020-12-01T00:00:00Z	ftp://ftp.ncbi.nlm.nih.gov/genomes/all/GCF/015/708/105/GCF_015708105	WGS;RefSeq	BioProject:PRJNA224116;BioSample:SAMN14771428;Assembly:GCF_015708105.1	{'organism': ['Lactobacillus crispatus'], 'mol_type': ['genomic DNA'], 'submitter_seqid': ['LcB143_contig_99'], 'strain': ['CRI4'], 'isolation_source': ['vagina'], 'host': ['Homo sapiens'], 'db_xref': ['taxon:47770'], 'country': ['Brazil']}	{'authors': 'Viana,M.V.C., Almeida,M.O., Kato,R.B., Miranda,F.M., Carvalho,R.D.O., Drumond,M., Brenig,B. and Azevedo,V.', 'title': 'Draft genome sequence of Lactobacillus crispatus strain CRI4', 'journal': 'Unpublished', 'pubmed_id': ''}	['"Eubacterium crispatum" Brygoo and Aladame 1953;authority', 'Eubacterium crispatum;synonym', 'Lactobacillus crispatus (Brygoo and Aladame 1953) Moore and Holdeman 1970 (Approved Lists) emend. Cato et al. 1983;authority']	d__Bacteria;p__Firmicutes;c__Bacilli;o__Lactobacillales;f__Lactobacillaceae;g__Lactobacillus;s__Lactobacillus crispatus	GCF_002088015.1	95	d__Bacteria;p__Firmicutes;c__Bacilli;o__Lactobacillales;f__Lactobacillaceae;g__Lactobacillus;s__Lactobacillus crispatus	97.5	0.86	GCF_002088015.1	95	d__Bacteria;p__Firmicutes;c__Bacilli;o__Lactobacillales;f__Lactobacillaceae;g__Lactobacillus;s__Lactobacillus crispatus	97.5	0.86	d__Bacteria;p__Firmicutes;c__Bacilli;o__Lactobacillales;f__Lactobacillaceae;g__Lactobacillus;s__	taxonomic classification defined by topology and ANI	topological placement and ANI have congruent species assignments
GCF_016093195.1	Lactobacillus crispatus	C0176A1	Lactobacillus crispatus	Species	220	184	149851	2122608	36.69	23279	99.03	0.09	0	Homo sapiens	Mid-vagina	USA: Baltimore	39.2904 N 76.6122 W	2019	N/A	47770	cellular organisms; Bacteria; Terrabacteria group; Firmicutes; Bacilli; Lactobacillales; Lactobacillaceae; Lactobacillus; Lactobacillus crispatus	131567 2 1783272 1239 91061 186826 33958 1578 47770	SAMN17001304	PRJNA608123	Contig		JAEDCG01	2043	2020-12-15T00:00:00Z	ftp://ftp.ncbi.nlm.nih.gov/genomes/all/GCF/016/093/195/GCF_016093195	WGS;RefSeq	BioProject:PRJNA224116;BioSample:SAMN17001304;Assembly:GCF_016093195.1	{'organism': ['Lactobacillus crispatus'], 'mol_type': ['genomic DNA'], 'submitter_seqid': ['AIFBPANC_99'], 'strain': ['C0176A1'], 'isolation_source': ['Mid-vagina'], 'host': ['Homo sapiens'], 'db_xref': ['taxon:47770'], 'country': ['USA: Baltimore'], 'lat_lon': ['39.2904 N 76.6122 W'], 'collection_date': ['2019']}	{'authors': 'France,M., Rutt,L., Narina,S., Humphrys,M., Relman,D. and Ravel,J.', 'title': 'Genome sequence of Lactobacillus crispatus', 'journal': 'Unpublished', 'pubmed_id': ''}	['"Eubacterium crispatum" Brygoo and Aladame 1953;authority', 'Eubacterium crispatum;synonym', 'Lactobacillus crispatus (Brygoo and Aladame 1953) Moore and Holdeman 1970 (Approved Lists) emend. Cato et al. 1983;authority']	d__Bacteria;p__Firmicutes;c__Bacilli;o__Lactobacillales;f__Lactobacillaceae;g__Lactobacillus;s__Lactobacillus crispatus	GCF_002088015.1	95	d__Bacteria;p__Firmicutes;c__Bacilli;o__Lactobacillales;f__Lactobacillaceae;g__Lactobacillus;s__Lactobacillus crispatus	97.58	0.8	GCF_002088015.1	95	d__Bacteria;p__Firmicutes;c__Bacilli;o__Lactobacillales;f__Lactobacillaceae;g__Lactobacillus;s__Lactobacillus crispatus	97.58	0.8	d__Bacteria;p__Firmicutes;c__Bacilli;o__Lactobacillales;f__Lactobacillaceae;g__Lactobacillus;s__	taxonomic classification defined by topology and ANI	topological placement and ANI have congruent species assignments
GCF_016162065.1	Lactobacillus crispatus	LB63	Lactobacillus crispatus	Species	183	183	63228	2132357	36.81	20686	98.38	0.09	0	Homo sapiens	Vaginal Swab	Italy	44.767532 N 10.31437 E	2019-11-28	N/A	47770	cellular organisms; Bacteria; Terrabacteria group; Firmicutes; Bacilli; Lactobacillales; Lactobacillaceae; Lactobacillus; Lactobacillus crispatus	131567 2 1783272 1239 91061 186826 33958 1578 47770	SAMN15357368	PRJNA641630	Contig		JACCPR01	2026	2020-12-21T00:00:00Z	ftp://ftp.ncbi.nlm.nih.gov/genomes/all/GCF/016/162/065/GCF_016162065	WGS;RefSeq	BioProject:PRJNA224116;BioSample:SAMN15357368;Assembly:GCF_016162065.1	{'organism': ['Lactobacillus crispatus'], 'mol_type': ['genomic DNA'], 'submitter_seqid': ['Contig_99'], 'strain': ['LB63'], 'isolation_source': ['Vaginal Swab'], 'host': ['Homo sapiens'], 'db_xref': ['taxon:47770'], 'country': ['Italy'], 'lat_lon': ['44.767532 N 10.31437 E'], 'collection_date': ['2019-11-28']}	{'authors': 'Mancino,W., Mancabelli,L., Lugli,G.A., Milani,C., Viappiani,A., Anzalone,R., Longhi,G., Ventura,M. and Turroni,F.', 'title': 'Comparative genomics analyses of Lactobacillus crispatus isolated from different ecological niches', 'journal': 'Unpublished', 'pubmed_id': ''}	['"Eubacterium crispatum" Brygoo and Aladame 1953;authority', 'Eubacterium crispatum;synonym', 'Lactobacillus crispatus (Brygoo and Aladame 1953) Moore and Holdeman 1970 (Approved Lists) emend. Cato et al. 1983;authority']	d__Bacteria;p__Firmicutes;c__Bacilli;o__Lactobacillales;f__Lactobacillaceae;g__Lactobacillus;s__Lactobacillus crispatus	GCF_002088015.1	95	d__Bacteria;p__Firmicutes;c__Bacilli;o__Lactobacillales;f__Lactobacillaceae;g__Lactobacillus;s__Lactobacillus crispatus	97.73	0.8	GCF_002088015.1	95	d__Bacteria;p__Firmicutes;c__Bacilli;o__Lactobacillales;f__Lactobacillaceae;g__Lactobacillus;s__Lactobacillus crispatus	97.73	0.8	d__Bacteria;p__Firmicutes;c__Bacilli;o__Lactobacillales;f__Lactobacillaceae;g__Lactobacillus;s__	taxonomic classification defined by topology and ANI	topological placement and ANI have congruent species assignments
GCF_016162125.1	Lactobacillus crispatus	LB62	Lactobacillus crispatus	Species	172	172	108549	2160518	36.95	23619	99.03	0.09	0	Homo sapiens	Vaginal Swab	Italy	44.767532 N 10.31437 E	2019-11-28	N/A	47770	cellular organisms; Bacteria; Terrabacteria group; Firmicutes; Bacilli; Lactobacillales; Lactobacillaceae; Lactobacillus; Lactobacillus crispatus	131567 2 1783272 1239 91061 186826 33958 1578 47770	SAMN15357367	PRJNA641630	Contig		JACCPS01	2089	2020-12-21T00:00:00Z	ftp://ftp.ncbi.nlm.nih.gov/genomes/all/GCF/016/162/125/GCF_016162125	WGS;RefSeq	BioProject:PRJNA224116;BioSample:SAMN15357367;Assembly:GCF_016162125.1	{'organism': ['Lactobacillus crispatus'], 'mol_type': ['genomic DNA'], 'submitter_seqid': ['Contig_99'], 'strain': ['LB62'], 'isolation_source': ['Vaginal Swab'], 'host': ['Homo sapiens'], 'db_xref': ['taxon:47770'], 'country': ['Italy'], 'lat_lon': ['44.767532 N 10.31437 E'], 'collection_date': ['2019-11-28']}	{'authors': 'Mancino,W., Mancabelli,L., Lugli,G.A., Milani,C., Viappiani,A., Anzalone,R., Longhi,G., Ventura,M. and Turroni,F.', 'title': 'Comparative genomics analyses of Lactobacillus crispatus isolated from different ecological niches', 'journal': 'Unpublished', 'pubmed_id': ''}	['"Eubacterium crispatum" Brygoo and Aladame 1953;authority', 'Eubacterium crispatum;synonym', 'Lactobacillus crispatus (Brygoo and Aladame 1953) Moore and Holdeman 1970 (Approved Lists) emend. Cato et al. 1983;authority']	d__Bacteria;p__Firmicutes;c__Bacilli;o__Lactobacillales;f__Lactobacillaceae;g__Lactobacillus;s__Lactobacillus crispatus	GCF_002088015.1	95	d__Bacteria;p__Firmicutes;c__Bacilli;o__Lactobacillales;f__Lactobacillaceae;g__Lactobacillus;s__Lactobacillus crispatus	97.75	0.77	GCF_002088015.1	95	d__Bacteria;p__Firmicutes;c__Bacilli;o__Lactobacillales;f__Lactobacillaceae;g__Lactobacillus;s__Lactobacillus crispatus	97.75	0.77	d__Bacteria;p__Firmicutes;c__Bacilli;o__Lactobacillales;f__Lactobacillaceae;g__Lactobacillus;s__	taxonomic classification defined by topology and ANI	topological placement and ANI have congruent species assignments
GCF_016162145.1	Lactobacillus crispatus	LB58	Lactobacillus crispatus	Species	200	200	88713	2236048	36.63	19543	99.03	0.37	0	Homo sapiens	Vaginal Swab	Italy	44.767532 N 10.31437 E	2019-11-28	N/A	47770	cellular organisms; Bacteria; Terrabacteria group; Firmicutes; Bacilli; Lactobacillales; Lactobacillaceae; Lactobacillus; Lactobacillus crispatus	131567 2 1783272 1239 91061 186826 33958 1578 47770	SAMN15357364	PRJNA641630	Contig		JACCPV01	2089	2020-12-21T00:00:00Z	ftp://ftp.ncbi.nlm.nih.gov/genomes/all/GCF/016/162/145/GCF_016162145	WGS;RefSeq	BioProject:PRJNA224116;BioSample:SAMN15357364;Assembly:GCF_016162145.1	{'organism': ['Lactobacillus crispatus'], 'mol_type': ['genomic DNA'], 'submitter_seqid': ['Contig_99'], 'strain': ['LB58'], 'isolation_source': ['Vaginal Swab'], 'host': ['Homo sapiens'], 'db_xref': ['taxon:47770'], 'country': ['Italy'], 'lat_lon': ['44.767532 N 10.31437 E'], 'collection_date': ['2019-11-28']}	{'authors': 'Mancino,W., Mancabelli,L., Lugli,G.A., Milani,C., Viappiani,A., Anzalone,R., Longhi,G., Ventura,M. and Turroni,F.', 'title': 'Comparative genomics analyses of Lactobacillus crispatus isolated from different ecological niches', 'journal': 'Unpublished', 'pubmed_id': ''}	['"Eubacterium crispatum" Brygoo and Aladame 1953;authority', 'Eubacterium crispatum;synonym', 'Lactobacillus crispatus (Brygoo and Aladame 1953) Moore and Holdeman 1970 (Approved Lists) emend. Cato et al. 1983;authority']	d__Bacteria;p__Firmicutes;c__Bacilli;o__Lactobacillales;f__Lactobacillaceae;g__Lactobacillus;s__Lactobacillus crispatus	GCF_002088015.1	95	d__Bacteria;p__Firmicutes;c__Bacilli;o__Lactobacillales;f__Lactobacillaceae;g__Lactobacillus;s__Lactobacillus crispatus	97.77	0.77	GCF_002088015.1	95	d__Bacteria;p__Firmicutes;c__Bacilli;o__Lactobacillales;f__Lactobacillaceae;g__Lactobacillus;s__Lactobacillus crispatus	97.77	0.77	d__Bacteria;p__Firmicutes;c__Bacilli;o__Lactobacillales;f__Lactobacillaceae;g__Lactobacillus;s__	taxonomic classification defined by topology and ANI	topological placement and ANI have congruent species assignments
GCF_016162155.1	Lactobacillus crispatus	LB61	Lactobacillus crispatus	Species	140	140	137224	2081602	36.93	29013	99.03	0.09	0	Homo sapiens	Vaginal Swab	Italy	44.767532 N 10.31437 E	2019-11-28	N/A	47770	cellular organisms; Bacteria; Terrabacteria group; Firmicutes; Bacilli; Lactobacillales; Lactobacillaceae; Lactobacillus; Lactobacillus crispatus	131567 2 1783272 1239 91061 186826 33958 1578 47770	SAMN15357366	PRJNA641630	Contig		JACCPT01	1953	2020-12-21T00:00:00Z	ftp://ftp.ncbi.nlm.nih.gov/genomes/all/GCF/016/162/155/GCF_016162155	WGS;RefSeq	BioProject:PRJNA224116;BioSample:SAMN15357366;Assembly:GCF_016162155.1	{'organism': ['Lactobacillus crispatus'], 'mol_type': ['genomic DNA'], 'submitter_seqid': ['Contig_99'], 'strain': ['LB61'], 'isolation_source': ['Vaginal Swab'], 'host': ['Homo sapiens'], 'db_xref': ['taxon:47770'], 'country': ['Italy'], 'lat_lon': ['44.767532 N 10.31437 E'], 'collection_date': ['2019-11-28']}	{'authors': 'Mancino,W., Mancabelli,L., Lugli,G.A., Milani,C., Viappiani,A., Anzalone,R., Longhi,G., Ventura,M. and Turroni,F.', 'title': 'Comparative genomics analyses of Lactobacillus crispatus isolated from different ecological niches', 'journal': 'Unpublished', 'pubmed_id': ''}	['"Eubacterium crispatum" Brygoo and Aladame 1953;authority', 'Eubacterium crispatum;synonym', 'Lactobacillus crispatus (Brygoo and Aladame 1953) Moore and Holdeman 1970 (Approved Lists) emend. Cato et al. 1983;authority']	d__Bacteria;p__Firmicutes;c__Bacilli;o__Lactobacillales;f__Lactobacillaceae;g__Lactobacillus;s__Lactobacillus crispatus	GCF_002088015.1	95	d__Bacteria;p__Firmicutes;c__Bacilli;o__Lactobacillales;f__Lactobacillaceae;g__Lactobacillus;s__Lactobacillus crispatus	97.87	0.79	GCF_002088015.1	95	d__Bacteria;p__Firmicutes;c__Bacilli;o__Lactobacillales;f__Lactobacillaceae;g__Lactobacillus;s__Lactobacillus crispatus	97.87	0.79	d__Bacteria;p__Firmicutes;c__Bacilli;o__Lactobacillales;f__Lactobacillaceae;g__Lactobacillus;s__	taxonomic classification defined by topology and ANI	topological placement and ANI have congruent species assignments
GCF_016162165.1	Lactobacillus crispatus	LB59	Lactobacillus crispatus	Species	189	189	91209	2135344	36.77	17957	99.03	0.09	0	Homo sapiens	Vaginal Swab	Italy	44.767532 N 10.31437 E	2019-11-28	N/A	47770	cellular organisms; Bacteria; Terrabacteria group; Firmicutes; Bacilli; Lactobacillales; Lactobacillaceae; Lactobacillus; Lactobacillus crispatus	131567 2 1783272 1239 91061 186826 33958 1578 47770	SAMN15357365	PRJNA641630	Contig		JACCPU01	2002	2020-12-21T00:00:00Z	ftp://ftp.ncbi.nlm.nih.gov/genomes/all/GCF/016/162/165/GCF_016162165	WGS;RefSeq	BioProject:PRJNA224116;BioSample:SAMN15357365;Assembly:GCF_016162165.1	{'organism': ['Lactobacillus crispatus'], 'mol_type': ['genomic DNA'], 'submitter_seqid': ['Contig_99'], 'strain': ['LB59'], 'isolation_source': ['Vaginal Swab'], 'host': ['Homo sapiens'], 'db_xref': ['taxon:47770'], 'country': ['Italy'], 'lat_lon': ['44.767532 N 10.31437 E'], 'collection_date': ['2019-11-28']}	{'authors': 'Mancino,W., Mancabelli,L., Lugli,G.A., Milani,C., Viappiani,A., Anzalone,R., Longhi,G., Ventura,M. and Turroni,F.', 'title': 'Comparative genomics analyses of Lactobacillus crispatus isolated from different ecological niches', 'journal': 'Unpublished', 'pubmed_id': ''}	['"Eubacterium crispatum" Brygoo and Aladame 1953;authority', 'Eubacterium crispatum;synonym', 'Lactobacillus crispatus (Brygoo and Aladame 1953) Moore and Holdeman 1970 (Approved Lists) emend. Cato et al. 1983;authority']	d__Bacteria;p__Firmicutes;c__Bacilli;o__Lactobacillales;f__Lactobacillaceae;g__Lactobacillus;s__Lactobacillus crispatus	GCF_002088015.1	95	d__Bacteria;p__Firmicutes;c__Bacilli;o__Lactobacillales;f__Lactobacillaceae;g__Lactobacillus;s__Lactobacillus crispatus	97.82	0.8	GCF_002088015.1	95	d__Bacteria;p__Firmicutes;c__Bacilli;o__Lactobacillales;f__Lactobacillaceae;g__Lactobacillus;s__Lactobacillus crispatus	97.82	0.8	d__Bacteria;p__Firmicutes;c__Bacilli;o__Lactobacillales;f__Lactobacillaceae;g__Lactobacillus;s__	taxonomic classification defined by topology and ANI	topological placement and ANI have congruent species assignments
GCF_016162185.1	Lactobacillus crispatus	LB57	Lactobacillus crispatus	Species	260	260	92432	2382241	37.13	23242	99.03	1.64	45.45	Homo sapiens	Vaginal Swab	Italy	44.767532 N 10.31437 E	2019-11-28	N/A	47770	cellular organisms; Bacteria; Terrabacteria group; Firmicutes; Bacilli; Lactobacillales; Lactobacillaceae; Lactobacillus; Lactobacillus crispatus	131567 2 1783272 1239 91061 186826 33958 1578 47770	SAMN15357363	PRJNA641630	Contig		JACCPW01	2312	2020-12-21T00:00:00Z	ftp://ftp.ncbi.nlm.nih.gov/genomes/all/GCF/016/162/185/GCF_016162185	WGS;RefSeq	BioProject:PRJNA224116;BioSample:SAMN15357363;Assembly:GCF_016162185.1	{'organism': ['Lactobacillus crispatus'], 'mol_type': ['genomic DNA'], 'submitter_seqid': ['Contig_99'], 'strain': ['LB57'], 'isolation_source': ['Vaginal Swab'], 'host': ['Homo sapiens'], 'db_xref': ['taxon:47770'], 'country': ['Italy'], 'lat_lon': ['44.767532 N 10.31437 E'], 'collection_date': ['2019-11-28']}	{'authors': 'Mancino,W., Mancabelli,L., Lugli,G.A., Milani,C., Viappiani,A., Anzalone,R., Longhi,G., Ventura,M. and Turroni,F.', 'title': 'Comparative genomics analyses of Lactobacillus crispatus isolated from different ecological niches', 'journal': 'Unpublished', 'pubmed_id': ''}	['"Eubacterium crispatum" Brygoo and Aladame 1953;authority', 'Eubacterium crispatum;synonym', 'Lactobacillus crispatus (Brygoo and Aladame 1953) Moore and Holdeman 1970 (Approved Lists) emend. Cato et al. 1983;authority']	d__Bacteria;p__Firmicutes;c__Bacilli;o__Lactobacillales;f__Lactobacillaceae;g__Lactobacillus;s__Lactobacillus crispatus	GCF_002088015.1	95	d__Bacteria;p__Firmicutes;c__Bacilli;o__Lactobacillales;f__Lactobacillaceae;g__Lactobacillus;s__Lactobacillus crispatus	97.69	0.77	GCF_002088015.1	95	d__Bacteria;p__Firmicutes;c__Bacilli;o__Lactobacillales;f__Lactobacillaceae;g__Lactobacillus;s__Lactobacillus crispatus	97.69	0.77	d__Bacteria;p__Firmicutes;c__Bacilli;o__Lactobacillales;f__Lactobacillaceae;g__Lactobacillus;s__	taxonomic classification defined by topology and ANI	topological placement and ANI have congruent species assignments
GCF_016162195.1	Lactobacillus crispatus	LB56	Lactobacillus crispatus	Species	196	196	65693	2160861	36.95	16898	99.03	0.09	0	Homo sapiens	Vaginal Swab	Italy	44.767532 N 10.31437 E	2019-11-28	N/A	47770	cellular organisms; Bacteria; Terrabacteria group; Firmicutes; Bacilli; Lactobacillales; Lactobacillaceae; Lactobacillus; Lactobacillus crispatus	131567 2 1783272 1239 91061 186826 33958 1578 47770	SAMN15357362	PRJNA641630	Contig		JACCPX01	2087	2020-12-21T00:00:00Z	ftp://ftp.ncbi.nlm.nih.gov/genomes/all/GCF/016/162/195/GCF_016162195	WGS;RefSeq	BioProject:PRJNA224116;BioSample:SAMN15357362;Assembly:GCF_016162195.1	{'organism': ['Lactobacillus crispatus'], 'mol_type': ['genomic DNA'], 'submitter_seqid': ['Contig_99'], 'strain': ['LB56'], 'isolation_source': ['Vaginal Swab'], 'host': ['Homo sapiens'], 'db_xref': ['taxon:47770'], 'country': ['Italy'], 'lat_lon': ['44.767532 N 10.31437 E'], 'collection_date': ['2019-11-28']}	{'authors': 'Mancino,W., Mancabelli,L., Lugli,G.A., Milani,C., Viappiani,A., Anzalone,R., Longhi,G., Ventura,M. and Turroni,F.', 'title': 'Comparative genomics analyses of Lactobacillus crispatus isolated from different ecological niches', 'journal': 'Unpublished', 'pubmed_id': ''}	['"Eubacterium crispatum" Brygoo and Aladame 1953;authority', 'Eubacterium crispatum;synonym', 'Lactobacillus crispatus (Brygoo and Aladame 1953) Moore and Holdeman 1970 (Approved Lists) emend. Cato et al. 1983;authority']	d__Bacteria;p__Firmicutes;c__Bacilli;o__Lactobacillales;f__Lactobacillaceae;g__Lactobacillus;s__Lactobacillus crispatus	GCF_002088015.1	95	d__Bacteria;p__Firmicutes;c__Bacilli;o__Lactobacillales;f__Lactobacillaceae;g__Lactobacillus;s__Lactobacillus crispatus	97.46	0.81	GCF_002088015.1	95	d__Bacteria;p__Firmicutes;c__Bacilli;o__Lactobacillales;f__Lactobacillaceae;g__Lactobacillus;s__Lactobacillus crispatus	97.46	0.81	d__Bacteria;p__Firmicutes;c__Bacilli;o__Lactobacillales;f__Lactobacillaceae;g__Lactobacillus;s__	taxonomic classification defined by topology and ANI	topological placement and ANI have congruent species assignments
GCF_016767795.1	Lactobacillus crispatus	PRL2021	Lactobacillus crispatus	Species	1	1	2411492	2411492	37.31	2411492	99.03	0.09	0	Homo sapiens	Vaginal Swab	Italy	44.767532 N 10.314366999999947 E	2019-11-28	N/A	47770	cellular organisms; Bacteria; Terrabacteria group; Firmicutes; Bacilli; Lactobacillales; Lactobacillaceae; Lactobacillus; Lactobacillus crispatus	131567 2 1783272 1239 91061 186826 33958 1578 47770	SAMN15357510	PRJNA641638	Complete	chromosome:NZ_CP058996.1/CP058996.1		2176	2021-01-28T00:00:00Z	ftp://ftp.ncbi.nlm.nih.gov/genomes/all/GCF/016/767/795/GCF_016767795	RefSeq	BioProject:PRJNA224116;BioSample:SAMN15357510;Assembly:GCF_016767795.1	{'organism': ['Lactobacillus crispatus'], 'mol_type': ['genomic DNA'], 'strain': ['PRL2021'], 'isolation_source': ['Vaginal Swab'], 'host': ['Homo sapiens'], 'db_xref': ['taxon:47770'], 'country': ['Italy'], 'lat_lon': ['44.767532 N 10.314366999999947 E'], 'collection_date': ['2019-11-28']}	{'authors': 'Mancino,W., Mancabelli,L., Lugli,G.A., Milani,C., Viappiani,A., Anzalone,R., Longhi,G., Ventura,M. and Turroni,F.', 'title': 'Comparative genomics analyses of Lactobacillus crispatus isolated from different ecological niches', 'journal': 'Unpublished', 'pubmed_id': ''}	['"Eubacterium crispatum" Brygoo and Aladame 1953;authority', 'Eubacterium crispatum;synonym', 'Lactobacillus crispatus (Brygoo and Aladame 1953) Moore and Holdeman 1970 (Approved Lists) emend. Cato et al. 1983;authority']	d__Bacteria;p__Firmicutes;c__Bacilli;o__Lactobacillales;f__Lactobacillaceae;g__Lactobacillus;s__Lactobacillus crispatus	GCF_002088015.1	95	d__Bacteria;p__Firmicutes;c__Bacilli;o__Lactobacillales;f__Lactobacillaceae;g__Lactobacillus;s__Lactobacillus crispatus	97.36	0.88	GCF_002088015.1	95	d__Bacteria;p__Firmicutes;c__Bacilli;o__Lactobacillales;f__Lactobacillaceae;g__Lactobacillus;s__Lactobacillus crispatus	97.36	0.88	d__Bacteria;p__Firmicutes;c__Bacilli;o__Lactobacillales;f__Lactobacillaceae;g__Lactobacillus;s__	taxonomic classification defined by topology and ANI	topological placement and ANI have congruent species assignments
GCF_019277925.1	Lactobacillus crispatus	10.2	Lactobacillus crispatus	Species	165	165	62866	2069648	36.99	19122	98.64	0.09	0	Homo sapiens	high vaginal swab	India: Haryana, Gurugram Civil Hospital	28.4612 N 77.0338 E	2016	Translational Health Science and Technology Institute (THSTI)	47770	cellular organisms; Bacteria; Terrabacteria group; Firmicutes; Bacilli; Lactobacillales; Lactobacillaceae; Lactobacillus; Lactobacillus crispatus	131567 2 1783272 1239 91061 186826 33958 1578 47770	SAMN18809436	PRJNA723235	Contig		JAGSXS01	2029	2021-07-19T00:00:00Z	ftp://ftp.ncbi.nlm.nih.gov/genomes/all/GCF/019/277/925/GCF_019277925	WGS;RefSeq	BioProject:PRJNA224116;BioSample:SAMN18809436;Assembly:GCF_019277925.1	{'organism': ['Lactobacillus crispatus'], 'mol_type': ['genomic DNA'], 'submitter_seqid': ['scaffold00484'], 'strain': ['10.2'], 'isolation_source': ['high vaginal swab'], 'host': ['Homo sapiens'], 'db_xref': ['taxon:47770'], 'country': ['India: Haryana, Gurugram Civil Hospital'], 'lat_lon': ['28.4612 N 77.0338 E'], 'collection_date': ['2016'], 'collected_by': ['Translational Health Science and T…	{'authors': 'Kumar,S., Kumari,N., Talukdar,D., Kothidar,A., Sarkar,M., Mehta,O., Kshetrapal,P., Wadhwa,N., Thiruvengadam,R., Desiraju,B.K., Nair,G.B., Bhatnagar,S., Mukherjee,S. and Das,B.', 'title': 'The Vaginal Microbial Signatures of Preterm Birth Delivery in Indian Women', 'journal': 'Front Cell Infect Microbiol 11, 622474 (2021)', 'pubmed_id': '34094994'}	['"Eubacterium crispatum" Brygoo and Aladame 1953;authority', 'Eubacterium crispatum;synonym', 'Lactobacillus crispatus (Brygoo and Aladame 1953) Moore and Holdeman 1970 (Approved Lists) emend. Cato et al. 1983;authority']	d__Bacteria;p__Firmicutes;c__Bacilli;o__Lactobacillales;f__Lactobacillaceae;g__Lactobacillus;s__Lactobacillus crispatus	GCF_002088015.1	95	d__Bacteria;p__Firmicutes;c__Bacilli;o__Lactobacillales;f__Lactobacillaceae;g__Lactobacillus;s__Lactobacillus crispatus	97.8	0.78	GCF_002088015.1	95	d__Bacteria;p__Firmicutes;c__Bacilli;o__Lactobacillales;f__Lactobacillaceae;g__Lactobacillus;s__Lactobacillus crispatus	97.8	0.78	d__Bacteria;p__Firmicutes;c__Bacilli;o__Lactobacillales;f__Lactobacillaceae;g__Lactobacillus;s__	taxonomic classification defined by topology and ANI	topological placement and ANI have congruent species assignments
GCF_019278055.1	Lactobacillus crispatus	8.2	Lactobacillus crispatus	Species	35	35	356599	2190096	36.72	103043	99.03	0.19	0	Homo sapiens	high vaginal swab	India: Haryana, Gurugram Civil Hospital	28.4612 N 77.0338 E	2016	Translational Health Science and Technology Institute (THSTI)	47770	cellular organisms; Bacteria; Terrabacteria group; Firmicutes; Bacilli; Lactobacillales; Lactobacillaceae; Lactobacillus; Lactobacillus crispatus	131567 2 1783272 1239 91061 186826 33958 1578 47770	SAMN18809434	PRJNA723235	Contig		JAGSXU01	2050	2021-07-19T00:00:00Z	ftp://ftp.ncbi.nlm.nih.gov/genomes/all/GCF/019/278/055/GCF_019278055	WGS;RefSeq	BioProject:PRJNA224116;BioSample:SAMN18809434;Assembly:GCF_019278055.1	{'organism': ['Lactobacillus crispatus'], 'mol_type': ['genomic DNA'], 'submitter_seqid': ['scaffold00035'], 'strain': ['8.2'], 'isolation_source': ['high vaginal swab'], 'host': ['Homo sapiens'], 'db_xref': ['taxon:47770'], 'country': ['India: Haryana, Gurugram Civil Hospital'], 'lat_lon': ['28.4612 N 77.0338 E'], 'collection_date': ['2016'], 'collected_by': ['Translational Health Science and Te…	{'authors': 'Kumar,S., Kumari,N., Talukdar,D., Kothidar,A., Sarkar,M., Mehta,O., Kshetrapal,P., Wadhwa,N., Thiruvengadam,R., Desiraju,B.K., Nair,G.B., Bhatnagar,S., Mukherjee,S. and Das,B.', 'title': 'The Vaginal Microbial Signatures of Preterm Birth Delivery in Indian Women', 'journal': 'Front Cell Infect Microbiol 11, 622474 (2021)', 'pubmed_id': '34094994'}	['"Eubacterium crispatum" Brygoo and Aladame 1953;authority', 'Eubacterium crispatum;synonym', 'Lactobacillus crispatus (Brygoo and Aladame 1953) Moore and Holdeman 1970 (Approved Lists) emend. Cato et al. 1983;authority']	d__Bacteria;p__Firmicutes;c__Bacilli;o__Lactobacillales;f__Lactobacillaceae;g__Lactobacillus;s__Lactobacillus crispatus	GCF_002088015.1	95	d__Bacteria;p__Firmicutes;c__Bacilli;o__Lactobacillales;f__Lactobacillaceae;g__Lactobacillus;s__Lactobacillus crispatus	98.03	0.85	GCF_002088015.1	95	d__Bacteria;p__Firmicutes;c__Bacilli;o__Lactobacillales;f__Lactobacillaceae;g__Lactobacillus;s__Lactobacillus crispatus	98.03	0.85	d__Bacteria;p__Firmicutes;c__Bacilli;o__Lactobacillales;f__Lactobacillaceae;g__Lactobacillus;s__	taxonomic classification defined by topology and ANI	topological placement and ANI have congruent species assignments
GCF_019278075.1	Lactobacillus crispatus	9.2	Lactobacillus crispatus	Species	155	155	68772	2049433	37.01	19126	98.38	0.09	0	Homo sapiens	high vaginal swab	India: Haryana, Gurugram Civil Hospital	28.4612 N 77.0338 E	2016	Translational Health Science and Technology Institute (THSTI)	47770	cellular organisms; Bacteria; Terrabacteria group; Firmicutes; Bacilli; Lactobacillales; Lactobacillaceae; Lactobacillus; Lactobacillus crispatus	131567 2 1783272 1239 91061 186826 33958 1578 47770	SAMN18809435	PRJNA723235	Contig		JAGSXT01	2013	2021-07-19T00:00:00Z	ftp://ftp.ncbi.nlm.nih.gov/genomes/all/GCF/019/278/075/GCF_019278075	WGS;RefSeq	BioProject:PRJNA224116;BioSample:SAMN18809435;Assembly:GCF_019278075.1	{'organism': ['Lactobacillus crispatus'], 'mol_type': ['genomic DNA'], 'submitter_seqid': ['scaffold00155'], 'strain': ['9.2'], 'isolation_source': ['high vaginal swab'], 'host': ['Homo sapiens'], 'db_xref': ['taxon:47770'], 'country': ['India: Haryana, Gurugram Civil Hospital'], 'lat_lon': ['28.4612 N 77.0338 E'], 'collection_date': ['2016'], 'collected_by': ['Translational Health Science and Te…	{'authors': 'Kumar,S., Kumari,N., Talukdar,D., Kothidar,A., Sarkar,M., Mehta,O., Kshetrapal,P., Wadhwa,N., Thiruvengadam,R., Desiraju,B.K., Nair,G.B., Bhatnagar,S., Mukherjee,S. and Das,B.', 'title': 'The Vaginal Microbial Signatures of Preterm Birth Delivery in Indian Women', 'journal': 'Front Cell Infect Microbiol 11, 622474 (2021)', 'pubmed_id': '34094994'}	['"Eubacterium crispatum" Brygoo and Aladame 1953;authority', 'Eubacterium crispatum;synonym', 'Lactobacillus crispatus (Brygoo and Aladame 1953) Moore and Holdeman 1970 (Approved Lists) emend. Cato et al. 1983;authority']	d__Bacteria;p__Firmicutes;c__Bacilli;o__Lactobacillales;f__Lactobacillaceae;g__Lactobacillus;s__Lactobacillus crispatus	GCF_002088015.1	95	d__Bacteria;p__Firmicutes;c__Bacilli;o__Lactobacillales;f__Lactobacillaceae;g__Lactobacillus;s__Lactobacillus crispatus	97.61	0.77	GCF_002088015.1	95	d__Bacteria;p__Firmicutes;c__Bacilli;o__Lactobacillales;f__Lactobacillaceae;g__Lactobacillus;s__Lactobacillus crispatus	97.61	0.77	d__Bacteria;p__Firmicutes;c__Bacilli;o__Lactobacillales;f__Lactobacillaceae;g__Lactobacillus;s__	taxonomic classification defined by topology and ANI	topological placement and ANI have congruent species assignments
GCF_019278105.1	Lactobacillus crispatus	5.1	Lactobacillus crispatus	Species	34	34	356599	2191964	36.71	103210	99.03	0.19	0	Homo sapiens	high vaginal swab	India: Haryana, Gurugram Civil Hospital	28.4612 N 77.0338 E	2016	Translational Health Science and Technology Institute (THSTI)	47770	cellular organisms; Bacteria; Terrabacteria group; Firmicutes; Bacilli; Lactobacillales; Lactobacillaceae; Lactobacillus; Lactobacillus crispatus	131567 2 1783272 1239 91061 186826 33958 1578 47770	SAMN18809432	PRJNA723235	Contig		JAGSXW01	2055	2021-07-19T00:00:00Z	ftp://ftp.ncbi.nlm.nih.gov/genomes/all/GCF/019/278/105/GCF_019278105	WGS;RefSeq	BioProject:PRJNA224116;BioSample:SAMN18809432;Assembly:GCF_019278105.1	{'organism': ['Lactobacillus crispatus'], 'mol_type': ['genomic DNA'], 'submitter_seqid': ['scaffold00034'], 'strain': ['5.1'], 'isolation_source': ['high vaginal swab'], 'host': ['Homo sapiens'], 'db_xref': ['taxon:47770'], 'country': ['India: Haryana, Gurugram Civil Hospital'], 'lat_lon': ['28.4612 N 77.0338 E'], 'collection_date': ['2016'], 'collected_by': ['Translational Health Science and Te…	{'authors': 'Kumar,S., Kumari,N., Talukdar,D., Kothidar,A., Sarkar,M., Mehta,O., Kshetrapal,P., Wadhwa,N., Thiruvengadam,R., Desiraju,B.K., Nair,G.B., Bhatnagar,S., Mukherjee,S. and Das,B.', 'title': 'The Vaginal Microbial Signatures of Preterm Birth Delivery in Indian Women', 'journal': 'Front Cell Infect Microbiol 11, 622474 (2021)', 'pubmed_id': '34094994'}	['"Eubacterium crispatum" Brygoo and Aladame 1953;authority', 'Eubacterium crispatum;synonym', 'Lactobacillus crispatus (Brygoo and Aladame 1953) Moore and Holdeman 1970 (Approved Lists) emend. Cato et al. 1983;authority']	d__Bacteria;p__Firmicutes;c__Bacilli;o__Lactobacillales;f__Lactobacillaceae;g__Lactobacillus;s__Lactobacillus crispatus	GCF_002088015.1	95	d__Bacteria;p__Firmicutes;c__Bacilli;o__Lactobacillales;f__Lactobacillaceae;g__Lactobacillus;s__Lactobacillus crispatus	97.98	0.86	GCF_002088015.1	95	d__Bacteria;p__Firmicutes;c__Bacilli;o__Lactobacillales;f__Lactobacillaceae;g__Lactobacillus;s__Lactobacillus crispatus	97.98	0.86	d__Bacteria;p__Firmicutes;c__Bacilli;o__Lactobacillales;f__Lactobacillaceae;g__Lactobacillus;s__	taxonomic classification defined by topology and ANI	topological placement and ANI have congruent species assignments
GCF_019278135.1	Lactobacillus crispatus	7.2	Lactobacillus crispatus	Species	36	36	356617	2188668	36.71	96587	99.03	0.19	0	Homo sapiens	high vaginal swab	India: Haryana, Gurugram Civil Hospital	28.4612 N 77.0338 E	2016	Translational Health Science and Technology Institute (THSTI)	47770	cellular organisms; Bacteria; Terrabacteria group; Firmicutes; Bacilli; Lactobacillales; Lactobacillaceae; Lactobacillus; Lactobacillus crispatus	131567 2 1783272 1239 91061 186826 33958 1578 47770	SAMN18809433	PRJNA723235	Contig		JAGSXV01	2054	2021-07-19T00:00:00Z	ftp://ftp.ncbi.nlm.nih.gov/genomes/all/GCF/019/278/135/GCF_019278135	WGS;RefSeq	BioProject:PRJNA224116;BioSample:SAMN18809433;Assembly:GCF_019278135.1	{'organism': ['Lactobacillus crispatus'], 'mol_type': ['genomic DNA'], 'submitter_seqid': ['scaffold00036'], 'strain': ['7.2'], 'isolation_source': ['high vaginal swab'], 'host': ['Homo sapiens'], 'db_xref': ['taxon:47770'], 'country': ['India: Haryana, Gurugram Civil Hospital'], 'lat_lon': ['28.4612 N 77.0338 E'], 'collection_date': ['2016'], 'collected_by': ['Translational Health Science and Te…	{'authors': 'Kumar,S., Kumari,N., Talukdar,D., Kothidar,A., Sarkar,M., Mehta,O., Kshetrapal,P., Wadhwa,N., Thiruvengadam,R., Desiraju,B.K., Nair,G.B., Bhatnagar,S., Mukherjee,S. and Das,B.', 'title': 'The Vaginal Microbial Signatures of Preterm Birth Delivery in Indian Women', 'journal': 'Front Cell Infect Microbiol 11, 622474 (2021)', 'pubmed_id': '34094994'}	['"Eubacterium crispatum" Brygoo and Aladame 1953;authority', 'Eubacterium crispatum;synonym', 'Lactobacillus crispatus (Brygoo and Aladame 1953) Moore and Holdeman 1970 (Approved Lists) emend. Cato et al. 1983;authority']	d__Bacteria;p__Firmicutes;c__Bacilli;o__Lactobacillales;f__Lactobacillaceae;g__Lactobacillus;s__Lactobacillus crispatus	GCF_002088015.1	95	d__Bacteria;p__Firmicutes;c__Bacilli;o__Lactobacillales;f__Lactobacillaceae;g__Lactobacillus;s__Lactobacillus crispatus	98.01	0.86	GCF_002088015.1	95	d__Bacteria;p__Firmicutes;c__Bacilli;o__Lactobacillales;f__Lactobacillaceae;g__Lactobacillus;s__Lactobacillus crispatus	98.01	0.86	d__Bacteria;p__Firmicutes;c__Bacilli;o__Lactobacillales;f__Lactobacillaceae;g__Lactobacillus;s__	taxonomic classification defined by topology and ANI	topological placement and ANI have congruent species assignments
GCF_019537355.1	Lactobacillus crispatus	UBLCp-01	Lactobacillus crispatus	Species	153	143	80612	2055090	36.61	31690	99.03	0.09	0	Homo sapiens	vagina of healthy reproductive Indian woman	India: Unique Biotech Limited, Hyderabad	N/A	2016-08-08	N/A	47770	cellular organisms; Bacteria; Terrabacteria group; Firmicutes; Bacilli; Lactobacillales; Lactobacillaceae; Lactobacillus; Lactobacillus crispatus	131567 2 1783272 1239 91061 186826 33958 1578 47770	SAMN20447867	PRJNA493554	Scaffold		JAIEUH01	1864	2021-08-10T00:00:00Z	ftp://ftp.ncbi.nlm.nih.gov/genomes/all/GCF/019/537/355/GCF_019537355	WGS;RefSeq	BioProject:PRJNA224116;BioSample:SAMN20447867;Assembly:GCF_019537355.1	{'organism': ['Lactobacillus crispatus'], 'mol_type': ['genomic DNA'], 'submitter_seqid': ['NODE_9_length_51698_cov_93.168323'], 'strain': ['UBLCp-01'], 'isolation_source': ['vagina of healthy reproductive Indian woman'], 'host': ['Homo sapiens'], 'db_xref': ['taxon:47770'], 'country': ['India: Unique Biotech Limited, Hyderabad'], 'collection_date': ['2016-08-08']}	{'authors': 'Sulthana,A., Lakshmi,S.G. and Madempudi,R.S.', 'title': 'Genome announcement of Lactobacillus crispatus UBLCp-01', 'journal': 'Unpublished', 'pubmed_id': ''}	['"Eubacterium crispatum" Brygoo and Aladame 1953;authority', 'Eubacterium crispatum;synonym', 'Lactobacillus crispatus (Brygoo and Aladame 1953) Moore and Holdeman 1970 (Approved Lists) emend. Cato et al. 1983;authority']	d__Bacteria;p__Firmicutes;c__Bacilli;o__Lactobacillales;f__Lactobacillaceae;g__Lactobacillus;s__Lactobacillus crispatus	GCF_002088015.1	95	d__Bacteria;p__Firmicutes;c__Bacilli;o__Lactobacillales;f__Lactobacillaceae;g__Lactobacillus;s__Lactobacillus crispatus	100	1	GCF_002088015.1	95	d__Bacteria;p__Firmicutes;c__Bacilli;o__Lactobacillales;f__Lactobacillaceae;g__Lactobacillus;s__Lactobacillus crispatus	100	1	d__Bacteria;p__Firmicutes;c__Bacilli;o__Lactobacillales;f__Lactobacillaceae;g__Lactobacillus;s__	taxonomic classification defined by topology and ANI	topological placement and ANI have congruent species assignments
*Downloaded from the NCBI unfiltered prokaryotes list at https://www.ncbi.nlm.nih.gov/genome/browse/#!/prokaryotes/
[truncated: 7 more columns]

## Sheet: Table S19
Table S19. Positional Lactobacillus crispatus pulA gene coverage in Kenyan Girls Health Study metagenomes with a pulA BLASTn hit
Participant ID	Position	Depth
2	1986082	112
2	1986083	108
2	1986084	107
2	1986085	106
2	1986086	106
2	1986087	103
2	1986088	103
2	1986089	105
2	1986090	106
2	1986091	106
2	1986092	107
2	1986093	108
2	1986094	105
2	1986095	104
2	1986096	103
2	1986097	101
2	1986098	101
2	1986099	103
2	1986100	103
2	1986101	103
2	1986102	103
2	1986103	103
2	1986104	103
2	1986105	101
2	1986106	101
2	1986107	103
2	1986108	103
2	1986109	101
2	1986110	97
2	1986111	99
2	1986112	97
2	1986113	96
2	1986114	96
2	1986115	95
2	1986116	97
2	1986117	99
2	1986118	100
2	1986119	100
2	1986120	100
2	1986121	101
2	1986122	102
2	1986123	99
2	1986124	97
2	1986125	97
2	1986126	97
2	1986127	99
2	1986128	101
2	1986129	99
2	1986130	99
2	1986131	100
2	1986132	100
2	1986133	100
2	1986134	98
2	1986135	99
2	1986136	101
2	1986137	102
2	1986138	105
2	1986139	107
2	1986140	107
2	1986141	107
2	1986142	106
2	1986143	106
2	1986144	105
2	1986145	106
2	1986146	106
2	1986147	106
2	1986148	107
2	1986149	105
2	1986150	107
2	1986151	105
2	1986152	104
2	1986153	104
2	1986154	105
2	1986155	107
2	1986156	104
2	1986157	102
2	1986158	102
2	1986159	103
2	1986160	104
2	1986161	104
2	1986162	105
2	1986163	101
2	1986164	101
2	1986165	103
2	1986166	101
2	1986167	100
2	1986168	99
2	1986169	101
2	1986170	100
2	1986171	100
2	1986172	99
2	1986173	97
2	1986174	97
2	1986175	98
2	1986176	98
2	1986177	97
2	1986178	98
2	1986179	98
2	1986180	101
2	1986181	102
2	1986182	102
2	1986183	101
2	1986184	99
2	1986185	100
2	1986186	98
2	1986187	99
2	1986188	99
2	1986189	99
2	1986190	99
2	1986191	97
2	1986192	98
2	1986193	98
2	1986194	99
2	1986195	99
2	1986196	100
2	1986197	100
2	1986198	102
2	1986199	102
2	1986200	102
2	1986201	102
2	1986202	102
2	1986203	103
2	1986204	102
2	1986205	102
2	1986206	102
2	1986207	98
2	1986208	96
2	1986209	97
2	1986210	97
2	1986211	99
2	1986212	99
2	1986213	102
2	1986214	100
2	1986215	101
2	1986216	102
2	1986217	101
2	1986218	99
2	1986219	101
2	1986220	99
2	1986221	99
2	1986222	98
2	1986223	97
2	1986224	97
2	1986225	98
2	1986226	98
2	1986227	97
2	1986228	93
2	1986229	93
2	1986230	93
2	1986231	94
2	1986232	96
2	1986233	98
2	1986234	99
2	1986235	99
2	1986236	98
2	1986237	98
2	1986238	96
2	1986239	93
2	1986240	90
2	1986241	92
2	1986242	93
2	1986243	92
2	1986244	91
2	1986245	91
2	1986246	90
2	1986247	91
2	1986248	90
2	1986249	90
2	1986250	91
2	1986251	91
2	1986252	94
2	1986253	92
2	1986254	93
2	1986255	93
2	1986256	95
2	1986257	95
2	1986258	94
2	1986259	95
2	1986260	93
2	1986261	94
2	1986262	94
2	1986263	93
2	1986264	95
2	1986265	95
2	1986266	93
2	1986267	91
2	1986268	89
2	1986269	90
2	1986270	87
2	1986271	86
2	1986272	87
2	1986273	89
2	1986274	90
2	1986275	90
2	1986276	91
2	1986277	91
2	1986278	90
2	1986279	90
2	1986280	90
2	1986281	89
2	1986282	89
2	1986283	89
2	1986284	89
2	1986285	87
2	1986286	90
2	1986287	90
2	1986288	89
2	1986289	88
2	1986290	96
2	1986291	97
2	1986292	97
2	1986293	99
2	1986294	100
2	1986295	100
2	1986296	106
2	1986297	106
2	1986298	103
2	1986299	104
2	1986300	104
2	1986301	102
2	1986302	104
2	1986303	105
2	1986304	105
2	1986305	104
2	1986306	105
2	1986307	103
2	1986308	104
2	1986309	104
2	1986310	105
2	1986311	104
2	1986312	107
2	1986313	107
2	1986314	106
2	1986315	107
2	1986316	107
2	1986317	107
2	1986318	107
2	1986319	107
2	1986320	107
2	1986321	109
2	1986322	112
2	1986323	112
2	1986324	112
2	1986325	112
2	1986326	109
2	1986327	108
2	1986328	108
2	1986329	111
2	1986330	112
2	1986331	115
2	1986332	115
2	1986333	116
2	1986334	116
2	1986335	116
2	1986336	117
2	1986337	116
2	1986338	115
2	1986339	115
2	1986340	113
2	1986341	114
2	1986342	115
2	1986343	116
2	1986344	116
2	1986345	116
2	1986346	115
2	1986347	116
2	1986348	116
2	1986349	117
2	1986350	117
2	1986351	117
2	1986352	117
2	1986353	117
2	1986354	116
2	1986355	117
2	1986356	115
2	1986357	116
2	1986358	116
2	1986359	116
2	1986360	116
2	1986361	118
2	1986362	116
2	1986363	117
2	1986364	116
2	1986365	115
2	1986366	115
2	1986367	115
2	1986368	117
2	1986369	117
2	1986370	117
2	1986371	115
2	1986372	116
2	1986373	115
2	1986374	115
2	1986375	117
2	1986376	119
2	1986377	118
2	1986378	119
2	1986379	119
2	1986380	120
2	1986381	117
2	1986382	118
2	1986383	118
2	1986384	119
2	1986385	118
2	1986386	117
2	1986387	118
2	1986388	118
2	1986389	120
2	1986390	122
2	1986391	121
2	1986392	119
2	1986393	116
2	1986394	114
2	1986395	114
2	1986396	114
2	1986397	114
2	1986398	114
2	1986399	114
2	1986400	115
2	1986401	112
2	1986402	111
2	1986403	110
2	1986404	111
2	1986405	110
2	1986406	110
2	1986407	111
2	1986408	111
2	1986409	111
2	1986410	111
2	1986411	113
2	1986412	114
2	1986413	114
2	1986414	114
2	1986415	112
2	1986416	109
2	1986417	110
2	1986418	113
2	1986419	113
2	1986420	110
2	1986421	109
2	1986422	108
2	1986423	110
2	1986424	110
2	1986425	110
2	1986426	111
2	1986427	112
2	1986428	113
2	1986429	112
2	1986430	112
2	1986431	116
2	1986432	116
2	1986433	116
2	1986434	119
2	1986435	120
2	1986436	118
2	1986437	115
2	1986438	116
2	1986439	116
2	1986440	118
2	1986441	116
2	1986442	117
2	1986443	117
2	1986444	117
2	1986445	117
2	1986446	117
2	1986447	114
2	1986448	114
2	1986449	112
2	1986450	113
2	1986451	114
2	1986452	115
2	1986453	117
2	1986454	117
2	1986455	119
2	1986456	119
2	1986457	121
2	1986458	121
2	1986459	120
2	1986460	123
2	1986461	125
2	1986462	124
2	1986463	123
2	1986464	120
2	1986465	120
2	1986466	119
2	1986467	121
2	1986468	121
2	1986469	121
2	1986470	120
2	1986471	119
2	1986472	117
2	1986473	115
2	1986474	116
2	1986475	118
2	1986476	122
2	1986477	122
2	1986478	120
2	1986479	124
2	1986480	124
2	1986481	123
2	1986482	127
2	1986483	126
2	1986484	125
2	1986485	125
2	1986486	124
2	1986487	122
2	1986488	121
2	1986489	121
2	1986490	121
2	1986491	121
2	1986492	121
2	1986493	120
2	1986494	120
2	1986495	121
2	1986496	121
2	1986497	123
2	1986498	122
2	1986499	122
2	1986500	122
2	1986501	124
2	1986502	127
2	1986503	129
2	1986504	129
2	1986505	129
2	1986506	130
2	1986507	130
2	1986508	127
2	1986509	128
2	1986510	129
2	1986511	128
2	1986512	129
2	1986513	129
2	1986514	129
2	1986515	125
2	1986516	125
2	1986517	126
2	1986518	124
2	1986519	126
2	1986520	126
2	1986521	127
2	1986522	127
2	1986523	126
2	1986524	126
2	1986525	125
2	1986526	125
2	1986527	125
2	1986528	127
2	1986529	124
2	1986530	125
2	1986531	124
2	1986532	124
2	1986533	123
2	1986534	124
2	1986535	126
2	1986536	126
2	1986537	127
2	1986538	128
2	1986539	129
2	1986540	127
2	1986541	125
2	1986542	123
2	1986543	121
2	1986544	119
2	1986545	119
2	1986546	120
2	1986547	122
2	1986548	121
2	1986549	120
2	1986550	119
2	1986551	120
2	1986552	120
2	1986553	120
2	1986554	120
2	1986555	121
2	1986556	121
2	1986557	124
2	1986558	125
2	1986559	125
2	1986560	125
2	1986561	124
2	1986562	125
2	1986563	125
2	1986564	126
2	1986565	128
2	1986566	128
2	1986567	130
2	1986568	129
2	1986569	126
2	1986570	129
2	1986571	127
2	1986572	127
2	1986573	130
2	1986574	130
2	1986575	132
2	1986576	132
2	1986577	133
2	1986578	134
2	1986579	135
2	1986580	133
2	1986581	138
2	1986582	136
2	1986583	136
2	1986584	136
2	1986585	137
2	1986586	135
2	1986587	135
2	1986588	136
2	1986589	137
2	1986590	138
2	1986591	138
2	1986592	138
2	1986593	129
2	1986594	128
2	1986595	129
2	1986596	129
2	1986597	128
2	1986598	127
2	1986599	126
2	1986600	123
2	1986601	120
2	1986602	119
2	1986603	121
2	1986604	115
2	1986605	115
2	1986606	114
2	1986607	114
2	1986608	114
2	1986609	118
2	1986610	119
2	1986611	116
2	1986612	115
2	1986613	115
2	1986614	116
2	1986615	116
2	1986616	115
2	1986617	119
2	1986618	119
2	1986619	118
2	1986620	118
2	1986621	119
2	1986622	117
2	1986623	117
2	1986624	120
2	1986625	119
2	1986626	115
2	1986627	117
2	1986628	118
2	1986629	118
2	1986630	120
2	1986631	118
2	1986632	116
2	1986633	114
2	1986634	115
2	1986635	118
2	1986636	119
2	1986637	119
2	1986638	120
2	1986639	121
2	1986640	121
2	1986641	121
2	1986642	121
2	1986643	121
2	1986644	120
2	1986645	122
2	1986646	122
2	1986647	124
2	1986648	124
2	1986649	124
2	1986650	125
2	1986651	126
2	1986652	130
2	1986653	129
2	1986654	128
2	1986655	130
2	1986656	131
2	1986657	130
2	1986658	131
2	1986659	131
2	1986660	131
2	1986661	131
2	1986662	133
2	1986663	132
2	1986664	132
2	1986665	131
2	1986666	134
2	1986667	136
2	1986668	134
2	1986669	134
2	1986670	137
2	1986671	136
2	1986672	139
2	1986673	139
2	1986674	139
2	1986675	144
2	1986676	144
2	1986677	142
2	1986678	142
2	1986679	140
2	1986680	141
2	1986681	140
2	1986682	143
2	1986683	143
2	1986684	142
2	1986685	142
2	1986686	141
2	1986687	143
2	1986688	145
2	1986689	144
2	1986690	147
2	1986691	146
2	1986692	146
2	1986693	145
2	1986694	145
2	1986695	152
2	1986696	152
2	1986697	151
2	1986698	148
2	1986699	145
2	1986700	143
2	1986701	145
2	1986702	148
2	1986703	148
2	1986704	145
2	1986705	146
2	1986706	145
2	1986707	141
2	1986708	141
2	1986709	140
2	1986710	141
2	1986711	145
2	1986712	145
2	1986713	142
2	1986714	142
2	1986715	139
2	1986716	139
2	1986717	138
2	1986718	140
2	1986719	140
2	1986720	141
2	1986721	141
2	1986722	140
2	1986723	135
2	1986724	134
2	1986725	134
2	1986726	136
2	1986727	137
2	1986728	131
2	1986729	131
2	1986730	128
2	1986731	128
2	1986732	126
2	1986733	126
2	1986734	127
2	1986735	128
2	1986736	127
2	1986737	127
2	1986738	127
2	1986739	125
2	1986740	125
2	1986741	124
2	1986742	124
2	1986743	124
2	1986744	125
2	1986745	128
2	1986746	129
2	1986747	128
2	1986748	128
2	1986749	126
2	1986750	127
2	1986751	127
2	1986752	130
2	1986753	132
2	1986754	130
2	1986755	130
2	1986756	127
2	1986757	127
2	1986758	127
2	1986759	125
2	1986760	123
2	1986761	123
2	1986762	123
2	1986763	124
2	1986764	124
2	1986765	124
2	1986766	123
2	1986767	123
2	1986768	123
2	1986769	121
2	1986770	121
2	1986771	121
2	1986772	122
2	1986773	122
2	1986774	123
2	1986775	123
2	1986776	122
2	1986777	122
2	1986778	119
2	1986779	116
2	1986780	115
2	1986781	116
2	1986782	115
2	1986783	113
2	1986784	114
2	1986785	114
2	1986786	113
2	1986787	113
2	1986788	114
2	1986789	113
2	1986790	113
2	1986791	113
2	1986792	113
2	1986793	114
2	1986794	113
2	1986795	113
2	1986796	110
2	1986797	108
2	1986798	106
2	1986799	104
2	1986800	104
2	1986801	98
2	1986802	99
2	1986803	100
2	1986804	99
2	1986805	100
2	1986806	100
2	1986807	98
2	1986808	97
2	1986809	97
2	1986810	99
2	1986811	100
2	1986812	98
2	1986813	95
2	1986814	96
2	1986815	96
2	1986816	99
2	1986817	101
2	1986818	100
2	1986819	99
2	1986820	100
2	1986821	97
2	1986822	98
2	1986823	97
2	1986824	96
2	1986825	96
2	1986826	92
2	1986827	92
2	1986828	94
2	1986829	94
2	1986830	96
2	1986831	96
2	1986832	97
2	1986833	94
2	1986834	94
2	1986835	94
2	1986836	95
2	1986837	95
2	1986838	96
2	1986839	96
2	1986840	97
2	1986841	91
2	1986842	90
2	1986843	91
2	1986844	89
2	1986845	91
2	1986846	87
2	1986847	87
2	1986848	87
2	1986849	88
2	1986850	87
2	1986851	91
2	1986852	91
2	1986853	88
2	1986854	89
2	1986855	94
2	1986856	94
2	1986857	94
2	1986858	94
2	1986859	96
2	1986860	95
2	1986861	95
2	1986862	94
2	1986863	93
2	1986864	95
2	1986865	98
2	1986866	98
2	1986867	98
2	1986868	100
2	1986869	98
2	1986870	98
2	1986871	103
2	1986872	104
2	1986873	105
2	1986874	106
2	1986875	106
2	1986876	107
2	1986877	106
2	1986878	104
2	1986879	104
2	1986880	104
2	1986881	106
2	1986882	107
2	1986883	109
2	1986884	109
2	1986885	109
2	1986886	109
2	1986887	109
2	1986888	106
2	1986889	106
2	1986890	106
2	1986891	107
2	1986892	108
2	1986893	108
2	1986894	108
2	1986895	105
2	1986896	104
2	1986897	100
2	1986898	100
2	1986899	100
2	1986900	100
2	1986901	101
2	1986902	103
2	1986903	103
2	1986904	106
2	1986905	107
2	1986906	106
2	1986907	106
2	1986908	106
2	1986909	106
2	1986910	106
2	1986911	107
2	1986912	106
2	1986913	109
2	1986914	110
2	1986915	110
2	1986916	112
2	1986917	112
2	1986918	112
2	1986919	112
2	1986920	113
2	1986921	113
2	1986922	113
2	1986923	111
2	1986924	113
2	1986925	113
2	1986926	114
2	1986927	117
2	1986928	117
2	1986929	116
2	1986930	116
2	1986931	119
2	1986932	120
2	1986933	121
2	1986934	125
2	1986935	125
2	1986936	126
2	1986937	127
2	1986938	127
2	1986939	126
2	1986940	126
2	1986941	126
2	1986942	130
2	1986943	130
2	1986944	132
2	1986945	131
2	1986946	130
2	1986947	129
2	1986948	129
2	1986949	129
2	1986950	129
2	1986951	129
2	1986952	128
2	1986953	130
2	1986954	126
2	1986955	123
2	1986956	124
2	1986957	121
2	1986958	123
2	1986959	125
2	1986960	124
2	1986961	124
2	1986962	123
2	1986963	126
2	1986964	127
2	1986965	126
2	1986966	130
2	1986967	128
2	1986968	126
2	1986969	126
2	1986970	126
2	1986971	125
2	1986972	125
2	1986973	125
2	1986974	125
2	1986975	125
2	1986976	125
2	1986977	125
2	1986978	125
2	1986979	126
2	1986980	127
2	1986981	126
2	1986982	127
2	1986983	125
2	1986984	123
2	1986985	123
2	1986986	119
2	1986987	118
2	1986988	119
2	1986989	120
2	1986990	120
2	1986991	119
2	1986992	119
2	1986993	119
2	1986994	119
2	1986995	120
2	1986996	124
2	1986997	126
2	1986998	128
2	1986999	129
2	1987000	126
2	1987001	129
2	1987002	127
2	1987003	128
2	1987004	126
2	1987005	128
2	1987006	127
2	1987007	126
2	1987008	124
2	1987009	126
2	1987010	124
2	1987011	122
2	1987012	122
2	1987013	123
2	1987014	125
2	1987015	127
2	1987016	128
2	1987017	128
2	1987018	126
2	1987019	127
2	1987020	127
2	1987021	127
2	1987022	122
2	1987023	123
2	1987024	122
2	1987025	119
2	1987026	119
2	1987027	119
2	1987028	117
2	1987029	119
2	1987030	120
2	1987031	123
2	1987032	125
2	1987033	124
2	1987034	127
2	1987035	128
2	1987036	127
2	1987037	126
2	1987038	125
2	1987039	125
2	1987040	125
2	1987041	123
2	1987042	123
2	1987043	123
2	1987044	123
2	1987045	123
2	1987046	123
2	1987047	123
2	1987048	123
2	1987049	124
2	1987050	124
2	1987051	125
2	1987052	127
2	1987053	126
2	1987054	123
2	1987055	122
2	1987056	122
2	1987057	122
2	1987058	119
2	1987059	119
2	1987060	118
2	1987061	120
2	1987062	120
2	1987063	118
2	1987064	114
2	1987065	116
2	1987066	116
2	1987067	114
2	1987068	116
2	1987069	119
2	1987070	121
2	1987071	122
2	1987072	122
2	1987073	123
2	1987074	122
2	1987075	121
2	1987076	121
2	1987077	122
2	1987078	120
2	1987079	120
2	1987080	120
2	1987081	118
2	1987082	118
2	1987083	118
2	1987084	115
2	1987085	113
2	1987086	112
2	1987087	112
2	1987088	112
2	1987089	112
2	1987090	115
2	1987091	115
2	1987092	115
2	1987093	114
2	1987094	106
2	1987095	105
2	1987096	105
2	1987097	105
2	1987098	104
2	1987099	104
2	1987100	105
2	1987101	105
2	1987102	105
2	1987103	105
2	1987104	105
2	1987105	105
2	1987106	107
2	1987107	105
2	1987108	103
2	1987109	103
2	1987110	103
2	1987111	103
2	1987112	103
2	1987113	103
2	1987114	103
2	1987115	102
2	1987116	102
2	1987117	101
2	1987118	100
2	1987119	102
2	1987120	102
2	1987121	101
2	1987122	101
2	1987123	105
2	1987124	105
2	1987125	103
2	1987126	105
2	1987127	105
2	1987128	108
2	1987129	107
2	1987130	106
2	1987131	108
2	1987132	111
2	1987133	112
2	1987134	112
2	1987135	114
2	1987136	115
2	1987137	117
2	1987138	117
2	1987139	116
2	1987140	115
2	1987141	122
2	1987142	122
2	1987143	120
2	1987144	117
2	1987145	117
2	1987146	120
2	1987147	115
2	1987148	117
2	1987149	123
2	1987150	121
2	1987151	121
2	1987152	118
2	1987153	119
2	1987154	117
2	1987155	118
2	1987156	122
2	1987157	119
2	1987158	119
2	1987159	119
2	1987160	124
2	1987161	126
2	1987162	126
2	1987163	129
2	1987164	129
2	1987165	129
2	1987166	132
2	1987167	129
2	1987168	127
2	1987169	127
2	1987170	129
2	1987171	129
2	1987172	129
2	1987173	129
2	1987174	132
2	1987175	133
2	1987176	135
2	1987177	135
2	1987178	138
2	1987179	137
2	1987180	138
2	1987181	142
2	1987182	143
2	1987183	143
2	1987184	145
2	1987185	138
2	1987186	141
2	1987187	141
2	1987188	141
2	1987189	140
2	1987190	141
2	1987191	142
2	1987192	142
2	1987193	142
2	1987194	142
2	1987195	144
2	1987196	148
2	1987197	151
2	1987198	152
2	1987199	152
2	1987200	153
2	1987201	153
2	1987202	152
2	1987203	153
2	1987204	153
2	1987205	152
2	1987206	152
2	1987207	150
2	1987208	150
2	1987209	151
2	1987210	153
2	1987211	154
2	1987212	151
2	1987213	159
2	1987214	159
2	1987215	159
2	1987216	160
2	1987217	161
2	1987218	160
2	1987219	159
2	1987220	159
2	1987221	157
2	1987222	157
2	1987223	155
2	1987224	157
2	1987225	157
2	1987226	155
2	1987227	154
2	1987228	153
2	1987229	152
2	1987230	152
2	1987231	153
2	1987232	154
2	1987233	151
2	1987234	156
2	1987235	156
2	1987236	156
2	1987237	156
2	1987238	153
2	1987239	153
2	1987240	153
2	1987241	157
2	1987242	159
2	1987243	159
2	1987244	159
2	1987245	162
2	1987246	158
2	1987247	156
2	1987248	156
2	1987249	156
2	1987250	157
2	1987251	156
2	1987252	155
2	1987253	155
2	1987254	156
2	1987255	156
2	1987256	156
2	1987257	156
2	1987258	156
2	1987259	157
2	1987260	158
2	1987261	158
2	1987262	160
2	1987263	160
2	1987264	156
2	1987265	163
2	1987266	164
2	1987267	164
2	1987268	165
2	1987269	163
2	1987270	163
2	1987271	163
2	1987272	163
2	1987273	164
2	1987274	165
2	1987275	165
2	1987276	162
2	1987277	164
2	1987278	164
2	1987279	164
2	1987280	166
2	1987281	167
2	1987282	165
2	1987283	163
2	1987284	158
2	1987285	156
2	1987286	150
2	1987287	149
2	1987288	147
2	1987289	144
2	1987290	143
2	1987291	143
2	1987292	138
2	1987293	142
2	1987294	142
2	1987295	141
2	1987296	136
2	1987297	136
2	1987298	136
2	1987299	136
2	1987300	131
2	1987301	130
2	1987302	133
2	1987303	132
2	1987304	131
2	1987305	131
2	1987306	131
2	1987307	133
2	1987308	134
2	1987309	135
2	1987310	137
2	1987311	136
2	1987312	133
2	1987313	133
2	1987314	137
2	1987315	135
2	1987316	134
2	1987317	134
2	1987318	139
2	1987319	138
2	1987320	139
2	1987321	135
2	1987322	137
2	1987323	139
2	1987324	141
2	1987325	143
2	1987326	141
2	1987327	142
2	1987328	143
2	1987329	142
2	1987330	142
2	1987331	143
2	1987332	144
2	1987333	145
2	1987334	145
2	1987335	146
2	1987336	147
2	1987337	148
2	1987338	148
2	1987339	149
2	1987340	149
2	1987341	149
2	1987342	148
2	1987343	146
2	1987344	146
2	1987345	147
2	1987346	147
2	1987347	145
2	1987348	144
2	1987349	145
2	1987350	145
2	1987351	145
2	1987352	143
2	1987353	145
2	1987354	142
2	1987355	143
2	1987356	138
2	1987357	139
2	1987358	140
2	1987359	139
2	1987360	137
2	1987361	136
2	1987362	134
2	1987363	136
2	1987364	134
2	1987365	135
2	1987366	135
2	1987367	135
2	1987368	134
2	1987369	140
2	1987370	143
2	1987371	143
2	1987372	143
2	1987373	145
2	1987374	145
2	1987375	146
2	1987376	146
2	1987377	150
2	1987378	150
2	1987379	150
2	1987380	147
2	1987381	150
2	1987382	154
2	1987383	156
2	1987384	157
2	1987385	154
2	1987386	154
2	1987387	150
2	1987388	152
2	1987389	150
2	1987390	150
2	1987391	150
2	1987392	147
2	1987393	147
2	1987394	147
2	1987395	149
2	1987396	149
2	1987397	148
2	1987398	151
2	1987399	154
2	1987400	154
2	1987401	156
2	1987402	156
2	1987403	156
2	1987404	160
2	1987405	158
2	1987406	156
2	1987407	155
2	1987408	153
2	1987409	156
2	1987410	154
2	1987411	154
2	1987412	153
2	1987413	150
2	1987414	151
2	1987415	152
2	1987416	156
2	1987417	157
2	1987418	156
2	1987419	157
2	1987420	159
2	1987421	159
2	1987422	160
2	1987423	163
2	1987424	162
2	1987425	164
2	1987426	165
2	1987427	164
2	1987428	162
2	1987429	160
2	1987430	159
2	1987431	157
2	1987432	154
2	1987433	154
2	1987434	155
2	1987435	154
2	1987436	156
2	1987437	158
2	1987438	159
2	1987439	159
2	1987440	160
2	1987441	156
2	1987442	156
2	1987443	156
2	1987444	156
2	1987445	156
2	1987446	156
2	1987447	156
2	1987448	162
2	1987449	160
2	1987450	157
2	1987451	158
2	1987452	158
2	1987453	157
2	1987454	157
2	1987455	157
2	1987456	157
2	1987457	159
2	1987458	160
2	1987459	158
2	1987460	157
2	1987461	158
2	1987462	161
2	1987463	161
2	1987464	161
2	1987465	160
2	1987466	159
2	1987467	160
2	1987468	160
2	1987469	158
2	1987470	158
2	1987471	156
2	1987472	155
2	1987473	155
2	1987474	154
2	1987475	154
2	1987476	154
2	1987477	156
2	1987478	156
2	1987479	154
2	1987480	152
2	1987481	151
2	1987482	149
2	1987483	148
2	1987484	151
2	1987485	154
2	1987486	153
2	1987487	152
2	1987488	154
2	1987489	154
2	1987490	150
2	1987491	148
2	1987492	147
2	1987493	147
2	1987494	148
2	1987495	149
2	1987496	146
2	1987497	145
2	1987498	144
2	1987499	138
2	1987500	140
2	1987501	142
2	1987502	142
2	1987503	142
2	1987504	143
2	1987505	144
2	1987506	142
2	1987507	143
2	1987508	144
2	1987509	144
2	1987510	146
2	1987511	147
2	1987512	149
2	1987513	149
2	1987514	150
2	1987515	149
2	1987516	152
2	1987517	152
2	1987518	153
2	1987519	151
2	1987520	149
2	1987521	147
2	1987522	147
2	1987523	149
2	1987524	145
2	1987525	145
2	1987526	144
2	1987527	144
2	1987528	142
2	1987529	140
2	1987530	136
2	1987531	140
2	1987532	135
2	1987533	135
2	1987534	133
2	1987535	131
2	1987536	131
2	1987537	131
2	1987538	133
2	1987539	129
2	1987540	131
2	1987541	130
2	1987542	131
2	1987543	131
2	1987544	130
2	1987545	129
2	1987546	128
2	1987547	128
2	1987548	129
2	1987549	124
2	1987550	123
2	1987551	124
2	1987552	122
2	1987553	123
2	1987554	121
2	1987555	121
2	1987556	120
2	1987557	121
2	1987558	123
2	1987559	122
2	1987560	123
2	1987561	123
2	1987562	124
2	1987563	124
2	1987564	123
2	1987565	125
2	1987566	126
2	1987567	124
2	1987568	123
2	1987569	123
2	1987570	122
2	1987571	121
2	1987572	120
2	1987573	123
2	1987574	123
2	1987575	122
2	1987576	116
2	1987577	115
2	1987578	114
2	1987579	114
2	1987580	114
2	1987581	117
2	1987582	117
2	1987583	117
2	1987584	118
2	1987585	117
2	1987586	120
2	1987587	123
2	1987588	122
2	1987589	122
2	1987590	120
2	1987591	119
2	1987592	117
2	1987593	117
2	1987594	118
2	1987595	118
2	1987596	118
2	1987597	117
2	1987598	117
2	1987599	116
2	1987600	116
2	1987601	116
2	1987602	113
2	1987603	112
2	1987604	112
2	1987605	112
2	1987606	111
2	1987607	111
2	1987608	111
2	1987609	110
2	1987610	110
2	1987611	109
2	1987612	107
2	1987613	106
2	1987614	106
2	1987615	106
2	1987616	107
2	1987617	110
2	1987618	109
2	1987619	108
2	1987620	109
2	1987621	108
2	1987622	108
2	1987623	108
2	1987624	109
2	1987625	109
2	1987626	112
2	1987627	115
2	1987628	113
2	1987629	112
2	1987630	111
2	1987631	112
2	1987632	113
2	1987633	115
2	1987634	114
2	1987635	113
2	1987636	111
2	1987637	111
2	1987638	111
2	1987639	110
2	1987640	110
2	1987641	111
2	1987642	111
2	1987643	111
2	1987644	108
2	1987645	107
2	1987646	105
2	1987647	102
2	1987648	103
2	1987649	103
2	1987650	106
2	1987651	104
2	1987652	104
2	1987653	104
2	1987654	104
2	1987655	104
2	1987656	101
2	1987657	104
2	1987658	102
2	1987659	102
2	1987660	102
2	1987661	102
2	1987662	101
2	1987663	98
2	1987664	98
2	1987665	97
2	1987666	98
2	1987667	98
2	1987668	99
2	1987669	101
2	1987670	101
2	1987671	99
2	1987672	100
2	1987673	102
2	1987674	104
2	1987675	104
2	1987676	104
2	1987677	104
2	1987678	103
2	1987679	107
2	1987680	107
2	1987681	107
2	1987682	107
2	1987683	107
2	1987684	111
2	1987685	109
2	1987686	111
2	1987687	113
2	1987688	113
2	1987689	114
2	1987690	115
2	1987691	115
2	1987692	116
2	1987693	116
2	1987694	114
2	1987695	115
2	1987696	113
2	1987697	111
2	1987698	109
2	1987699	110
2	1987700	110
2	1987701	110
2	1987702	110
2	1987703	110
2	1987704	108
2	1987705	108
2	1987706	108
2	1987707	109
2	1987708	111
2	1987709	109
2	1987710	108
2	1987711	110
2	1987712	110
2	1987713	111
2	1987714	111
2	1987715	113
2	1987716	108
2	1987717	107
2	1987718	107
2	1987719	107
2	1987720	109
2	1987721	109
2	1987722	110
2	1987723	109
2	1987724	110
2	1987725	110
2	1987726	109
2	1987727	110
2	1987728	112
2	1987729	111
2	1987730	111
2	1987731	110
2	1987732	109
2	1987733	109
2	1987734	113
2	1987735	113
2	1987736	112
2	1987737	112
2	1987738	111
2	1987739	110
2	1987740	111
2	1987741	114
2	1987742	116
2	1987743	115
2	1987744	114
2	1987745	115
2	1987746	116
2	1987747	118
2	1987748	117
2	1987749	118
2	1987750	118
2	1987751	120
2	1987752	120
2	1987753	119
2	1987754	122
2	1987755	124
2	1987756	126
2	1987757	129
2	1987758	129
2	1987759	129
2	1987760	129
2	1987761	131
2	1987762	130
2	1987763	129
2	1987764	129
2	1987765	129
2	1987766	130
2	1987767	129
2	1987768	129
2	1987769	129
2	1987770	133
2	1987771	131
2	1987772	131
2	1987773	131
2	1987774	131
2	1987775	128
2	1987776	128
2	1987777	131
2	1987778	130
2	1987779	132
2	1987780	130
2	1987781	133
2	1987782	132
2	1987783	134
2	1987784	132
2	1987785	132
2	1987786	138
2	1987787	138
2	1987788	138
2	1987789	136
2	1987790	136
2	1987791	136
2	1987792	134
2	1987793	134
2	1987794	132
2	1987795	134
2	1987796	136
2	1987797	134
2	1987798	134
2	1987799	134
2	1987800	135
2	1987801	138
2	1987802	137
2	1987803	138
2	1987804	136
2	1987805	137
2	1987806	137
2	1987807	136
2	1987808	135
2	1987809	136
2	1987810	136
2	1987811	136
2	1987812	136
2	1987813	138
2	1987814	139
2	1987815	137
2	1987816	135
2	1987817	135
2	1987818	137
2	1987819	136
2	1987820	135
2	1987821	134
2	1987822	134
2	1987823	136
2	1987824	138
2	1987825	138
2	1987826	143
2	1987827	144
2	1987828	144
2	1987829	142
2	1987830	142
2	1987831	145
2	1987832	145
2	1987833	143
2	1987834	144
2	1987835	141
2	1987836	141
2	1987837	139
2	1987838	139
2	1987839	138
2	1987840	137
2	1987841	134
2	1987842	132
2	1987843	132
2	1987844	135
2	1987845	135
2	1987846	134
2	1987847	134
2	1987848	132
2	1987849	133
2	1987850	131
2	1987851	131
2	1987852	132
2	1987853	133
2	1987854	137
2	1987855	138
2	1987856	140
2	1987857	140
2	1987858	140
2	1987859	142
2	1987860	143
2	1987861	142
2	1987862	145
2	1987863	146
2	1987864	150
2	1987865	150
2	1987866	150
2	1987867	151
2	1987868	153
2	1987869	151
2	1987870	152
2	1987871	151
2	1987872	153
2	1987873	150
2	1987874	146
2	1987875	144
2	1987876	144
2	1987877	145
2	1987878	146
2	1987879	143
2	1987880	143
2	1987881	141
2	1987882	142
2	1987883	145
2	1987884	143
2	1987885	143
2	1987886	142
2	1987887	142
2	1987888	143
2	1987889	146
2	1987890	147
2	1987891	149
2	1987892	147
2	1987893	146
2	1987894	147
2	1987895	147
2	1987896	147
2	1987897	147
2	1987898	149
2	1987899	148
2	1987900	148
2	1987901	148
2	1987902	146
2	1987903	144
2	1987904	142
2	1987905	145
2	1987906	145
2	1987907	138
2	1987908	136
2	1987909	134
2	1987910	133
2	1987911	133
2	1987912	134
2	1987913	135
2	1987914	137
2	1987915	137
2	1987916	138
2	1987917	135
2	1987918	134
2	1987919	134
2	1987920	134
2	1987921	133
2	1987922	133
2	1987923	133
2	1987924	131
2	1987925	130
2	1987926	129
2	1987927	129
2	1987928	130
2	1987929	131
2	1987930	132
2	1987931	132
2	1987932	131
2	1987933	129
2	1987934	129
2	1987935	129
2	1987936	128
2	1987937	127
2	1987938	125
2	1987939	126
2	1987940	125
2	1987941	124
2	1987942	125
2	1987943	125
2	1987944	125
2	1987945	125
2	1987946	124
2	1987947	125
2	1987948	126
2	1987949	125
2	1987950	124
2	1987951	120
2	1987952	120
2	1987953	119
2	1987954	116
2	1987955	120
2	1987956	119
2	1987957	117
2	1987958	118
2	1987959	121
2	1987960	119
2	1987961	119
2	1987962	117
2	1987963	120
2	1987964	120
2	1987965	120
2	1987966	120
2	1987967	117
2	1987968	118
2	1987969	118
2	1987970	118
2	1987971	120
2	1987972	120
2	1987973	122
2	1987974	121
2	1987975	117
2	1987976	116
2	1987977	117
2	1987978	116
2	1987979	116
2	1987980	117
2	1987981	117
2	1987982	119
2	1987983	119
2	1987984	120
2	1987985	120
2	1987986	120
2	1987987	121
2	1987988	122
2	1987989	120
2	1987990	118
2	1987991	118
2	1987992	118
2	1987993	118
2	1987994	117
2	1987995	116
2	1987996	115
2	1987997	114
2	1987998	113
2	1987999	109
2	1988000	108
2	1988001	105
2	1988002	106
2	1988003	100
2	1988004	100
2	1988005	101
2	1988006	101
2	1988007	101
2	1988008	101
2	1988009	102
2	1988010	101
2	1988011	101
2	1988012	100
2	1988013	99
2	1988014	100
2	1988015	99
2	1988016	99
2	1988017	100
2	1988018	97
2	1988019	96
2	1988020	100
2	1988021	99
2	1988022	99
2	1988023	99
2	1988024	99
2	1988025	99
2	1988026	98
2	1988027	97
2	1988028	97
2	1988029	94
2	1988030	95
2	1988031	95
2	1988032	95
2	1988033	97
2	1988034	96
2	1988035	97
2	1988036	98
2	1988037	98
2	1988038	98
2	1988039	101
2	1988040	99
2	1988041	101
2	1988042	100
2	1988043	100
2	1988044	101
2	1988045	103
2	1988046	103
2	1988047	103
2	1988048	100
2	1988049	98
2	1988050	98
2	1988051	96
2	1988052	97
2	1988053	96
2	1988054	95
2	1988055	92
2	1988056	90
2	1988057	93
2	1988058	92
2	1988059	92
2	1988060	92
2	1988061	92
2	1988062	95
2	1988063	93
2	1988064	94
2	1988065	93
2	1988066	94
2	1988067	93
2	1988068	95
2	1988069	97
2	1988070	98
2	1988071	99
2	1988072	102
2	1988073	102
2	1988074	103
2	1988075	103
2	1988076	103
2	1988077	102
2	1988078	102
2	1988079	103
[truncated: 32,022 more rows]

## Sheet: Table S20
Table S20. Positional Lactobacillus crispatus genome coverage in Kenyan Girls Health Study metagenomes without a pulA BLASTn hit
Participant ID	Position	Depth
1	3	33
1	4	33
1	5	34
1	6	35
1	7	35
1	8	35
1	9	36
1	10	36
1	11	36
1	12	36
1	13	38
1	14	38
1	15	38
1	16	38
1	17	38
1	18	38
1	19	38
1	20	39
1	21	41
1	22	41
1	23	42
1	24	42
1	25	42
1	26	44
1	27	44
1	28	46
1	29	46
1	30	46
1	31	48
1	32	48
1	33	48
1	34	48
1	35	48
1	36	48
1	37	48
1	38	48
1	39	48
1	40	48
1	41	48
1	42	47
1	43	48
1	44	49
1	45	48
1	46	47
1	47	47
1	48	47
1	49	46
1	50	46
1	51	47
1	52	47
1	53	48
1	54	48
1	55	48
1	56	47
1	57	47
1	58	49
1	59	49
1	60	49
1	61	49
1	62	49
1	63	49
1	64	49
1	65	48
1	66	49
1	67	49
1	68	49
1	69	51
1	70	52
1	71	52
1	72	52
1	73	52
1	74	51
1	75	52
1	76	52
1	77	50
1	78	51
1	79	49
1	80	49
1	81	48
1	82	49
1	83	49
1	84	49
1	85	49
1	86	51
1	87	51
1	88	51
1	89	53
1	90	53
1	91	53
1	92	54
1	93	56
1	94	55
1	95	55
1	96	54
1	97	55
1	98	55
1	99	56
1	100	56
1	101	55
1	102	55
1	103	55
1	104	58
1	105	58
1	106	59
1	107	59
1	108	60
1	109	61
1	110	61
1	111	62
1	112	62
1	113	63
1	114	63
1	115	62
1	116	62
1	117	62
1	118	62
1	119	62
1	120	62
1	121	61
1	122	62
1	123	61
1	124	61
1	125	61
1	126	61
1	127	60
1	128	60
1	129	60
1	130	61
1	131	61
1	132	61
1	133	62
1	134	62
1	135	62
1	136	64
1	137	66
1	138	66
1	139	65
1	140	65
1	141	65
1	142	65
1	143	63
1	144	63
1	145	63
1	146	60
1	147	60
1	148	57
1	149	57
1	150	57
1	151	56
1	152	59
1	153	59
1	154	58
1	155	58
1	156	57
1	157	56
1	158	56
1	159	58
1	160	58
1	161	56
1	162	57
1	163	57
1	164	58
1	165	58
1	166	61
1	167	61
1	168	61
1	169	61
1	170	61
1	171	61
1	172	60
1	173	60
1	174	59
1	175	60
1	176	60
1	177	61
1	178	61
1	179	59
1	180	59
1	181	59
1	182	57
1	183	57
1	184	57
1	185	58
1	186	59
1	187	59
1	188	59
1	189	60
1	190	64
1	191	64
1	192	64
1	193	64
1	194	63
1	195	64
1	196	64
1	197	63
1	198	63
1	199	59
1	200	61
1	201	61
1	202	61
1	203	61
1	204	60
1	205	62
1	206	62
1	207	62
1	208	62
1	209	63
1	210	66
1	211	68
1	212	68
1	213	67
1	214	67
1	215	67
1	216	67
1	217	67
1	218	66
1	219	67
1	220	67
1	221	66
1	222	66
1	223	65
1	224	64
1	225	66
1	226	68
1	227	67
1	228	68
1	229	68
1	230	68
1	231	68
1	232	68
1	233	67
1	234	69
1	235	68
1	236	68
1	237	66
1	238	66
1	239	66
1	240	64
1	241	64
1	242	64
1	243	62
1	244	62
1	245	62
1	246	62
1	247	62
1	248	62
1	249	62
1	250	63
1	251	62
1	252	62
1	253	59
1	254	59
1	255	58
1	256	60
1	257	60
1	258	60
1	259	59
1	260	58
1	261	58
1	262	58
1	263	58
1	264	57
1	265	58
1	266	58
1	267	58
1	268	58
1	269	60
1	270	58
1	271	59
1	272	57
1	273	56
1	274	58
1	275	57
1	276	58
1	277	56
1	278	56
1	279	56
1	280	56
1	281	57
1	282	57
1	283	59
1	284	59
1	285	58
1	286	58
1	287	56
1	288	54
1	289	54
1	290	55
1	291	55
1	292	55
1	293	55
1	294	56
1	295	56
1	296	57
1	297	57
1	298	58
1	299	60
1	300	59
1	301	59
1	302	59
1	303	58
1	304	58
1	305	58
1	306	58
1	307	58
1	308	58
1	309	58
1	310	58
1	311	58
1	312	58
1	313	57
1	314	58
1	315	58
1	316	59
1	317	56
1	318	58
1	319	59
1	320	59
1	321	59
1	322	59
1	323	59
1	324	58
1	325	61
1	326	60
1	327	60
1	328	59
1	329	60
1	330	60
1	331	60
1	332	60
1	333	60
1	334	60
1	335	65
1	336	65
1	337	65
1	338	64
1	339	64
1	340	61
1	341	60
1	342	60
1	343	60
1	344	61
1	345	61
1	346	61
1	347	61
1	348	64
1	349	66
1	350	64
1	351	64
1	352	64
1	353	65
1	354	65
1	355	65
1	356	65
1	357	67
1	358	69
1	359	69
1	360	66
1	361	65
1	362	64
1	363	64
1	364	63
1	365	63
1	366	63
1	367	62
1	368	61
1	369	60
1	370	56
1	371	54
1	372	55
1	373	55
1	374	55
1	375	55
1	376	57
1	377	56
1	378	56
1	379	56
1	380	57
1	381	57
1	382	57
1	383	59
1	384	59
1	385	59
1	386	60
1	387	60
1	388	60
1	389	62
1	390	62
1	391	62
1	392	60
1	393	59
1	394	59
1	395	59
1	396	59
1	397	59
1	398	59
1	399	62
1	400	62
1	401	62
1	402	62
1	403	64
1	404	64
1	405	62
1	406	62
1	407	62
1	408	63
1	409	63
1	410	66
1	411	67
1	412	67
1	413	67
1	414	67
1	415	67
1	416	67
1	417	67
1	418	67
1	419	67
1	420	69
1	421	69
1	422	70
1	423	70
1	424	69
1	425	70
1	426	71
1	427	71
1	428	71
1	429	73
1	430	76
1	431	76
1	432	75
1	433	76
1	434	73
1	435	73
1	436	72
1	437	72
1	438	72
1	439	72
1	440	73
1	441	69
1	442	70
1	443	72
1	444	70
1	445	69
1	446	70
1	447	69
1	448	68
1	449	68
1	450	68
1	451	70
1	452	68
1	453	69
1	454	68
1	455	68
1	456	69
1	457	69
1	458	69
1	459	69
1	460	69
1	461	69
1	462	69
1	463	68
1	464	68
1	465	65
1	466	66
1	467	62
1	468	62
1	469	63
1	470	63
1	471	63
1	472	63
1	473	63
1	474	64
1	475	64
1	476	64
1	477	66
1	478	66
1	479	66
1	480	66
1	481	66
1	482	66
1	483	66
1	484	66
1	485	65
1	486	63
1	487	63
1	488	63
1	489	64
1	490	65
1	491	65
1	492	65
1	493	63
1	494	64
1	495	64
1	496	63
1	497	63
1	498	64
1	499	63
1	500	62
1	501	62
1	502	64
1	503	65
1	504	65
1	505	65
1	506	65
1	507	65
1	508	67
1	509	65
1	510	65
1	511	65
1	512	65
1	513	65
1	514	66
1	515	66
1	516	66
1	517	66
1	518	67
1	519	67
1	520	68
1	521	66
1	522	66
1	523	64
1	524	64
1	525	64
1	526	62
1	527	61
1	528	61
1	529	61
1	530	62
1	531	61
1	532	62
1	533	62
1	534	61
1	535	61
1	536	61
1	537	60
1	538	60
1	539	60
1	540	58
1	541	59
1	542	57
1	543	57
1	544	57
1	545	59
1	546	61
1	547	61
1	548	61
1	549	61
1	550	60
1	551	61
1	552	63
1	553	65
1	554	65
1	555	65
1	556	66
1	557	68
1	558	72
1	559	71
1	560	69
1	561	68
1	562	68
1	563	68
1	564	69
1	565	71
1	566	71
1	567	71
1	568	71
1	569	72
1	570	71
1	571	69
1	572	69
1	573	69
1	574	68
1	575	68
1	576	69
1	577	69
1	578	69
1	579	68
1	580	68
1	581	67
1	582	67
1	583	68
1	584	67
1	585	65
1	586	65
1	587	65
1	588	65
1	589	65
1	590	65
1	591	65
1	592	66
1	593	65
1	594	65
1	595	64
1	596	63
1	597	61
1	598	61
1	599	60
1	600	60
1	601	60
1	602	60
1	603	61
1	604	61
1	605	61
1	606	61
1	607	60
1	608	60
1	609	61
1	610	62
1	611	62
1	612	64
1	613	64
1	614	63
1	615	65
1	616	66
1	617	67
1	618	67
1	619	68
1	620	66
1	621	66
1	622	65
1	623	66
1	624	66
1	625	65
1	626	65
1	627	64
1	628	64
1	629	60
1	630	60
1	631	60
1	632	60
1	633	59
1	634	61
1	635	61
1	636	61
1	637	60
1	638	60
1	639	60
1	640	58
1	641	59
1	642	59
1	643	59
1	644	59
1	645	58
1	646	58
1	647	58
1	648	58
1	649	57
1	650	56
1	651	56
1	652	56
1	653	56
1	654	55
1	655	55
1	656	57
1	657	55
1	658	58
1	659	58
1	660	57
1	661	57
1	662	57
1	663	58
1	664	57
1	665	56
1	666	56
1	667	56
1	668	56
1	669	54
1	670	55
1	671	54
1	672	54
1	673	55
1	674	54
1	675	54
1	676	53
1	677	53
1	678	53
1	679	54
1	680	54
1	681	53
1	682	56
1	683	55
1	684	55
1	685	53
1	686	55
1	687	55
1	688	55
1	689	56
1	690	58
1	691	58
1	692	57
1	693	58
1	694	58
1	695	58
1	696	56
1	697	57
1	698	57
1	699	55
1	700	55
1	701	55
1	702	55
1	703	55
1	704	56
1	705	57
1	706	57
1	707	56
1	708	56
1	709	56
1	710	56
1	711	56
1	712	58
1	713	57
1	714	59
1	715	59
1	716	59
1	717	59
1	718	59
1	719	60
1	720	59
1	721	59
1	722	58
1	723	58
1	724	59
1	725	59
1	726	59
1	727	58
1	728	58
1	729	57
1	730	57
1	731	55
1	732	56
1	733	57
1	734	56
1	735	57
1	736	58
1	737	58
1	738	58
1	739	58
1	740	59
1	741	59
1	742	59
1	743	58
1	744	58
1	745	58
1	746	59
1	747	59
1	748	59
1	749	58
1	750	60
1	751	60
1	752	62
1	753	61
1	754	61
1	755	61
1	756	62
1	757	62
1	758	62
1	759	63
1	760	61
1	761	62
1	762	62
1	763	60
1	764	60
1	765	62
1	766	62
1	767	61
1	768	62
1	769	62
1	770	61
1	771	62
1	772	62
1	773	63
1	774	62
1	775	62
1	776	67
1	777	67
1	778	67
1	779	66
1	780	67
1	781	67
1	782	66
1	783	65
1	784	65
1	785	64
1	786	64
1	787	64
1	788	65
1	789	66
1	790	66
1	791	66
1	792	65
1	793	65
1	794	65
1	795	65
1	796	65
1	797	65
1	798	67
1	799	67
1	800	67
1	801	68
1	802	68
1	803	69
1	804	69
1	805	70
1	806	70
1	807	68
1	808	68
1	809	65
1	810	65
1	811	65
1	812	65
1	813	63
1	814	63
1	815	63
1	816	63
1	817	63
1	818	63
1	819	64
1	820	65
1	821	64
1	822	64
1	823	63
1	824	61
1	825	62
1	826	62
1	827	61
1	828	63
1	829	63
1	830	62
1	831	63
1	832	63
1	833	61
1	834	60
1	835	61
1	836	61
1	837	61
1	838	61
1	839	62
1	840	61
1	841	60
1	842	60
1	843	61
1	844	60
1	845	59
1	846	60
1	847	61
1	848	62
1	849	63
1	850	64
1	851	64
1	852	63
1	853	62
1	854	62
1	855	62
1	856	61
1	857	61
1	858	61
1	859	61
1	860	61
1	861	62
1	862	63
1	863	62
1	864	60
1	865	59
1	866	60
1	867	61
1	868	61
1	869	60
1	870	60
1	871	60
1	872	61
1	873	61
1	874	61
1	875	60
1	876	60
1	877	61
1	878	62
1	879	62
1	880	62
1	881	60
1	882	60
1	883	60
1	884	60
1	885	60
1	886	59
1	887	57
1	888	56
1	889	56
1	890	55
1	891	55
1	892	55
1	893	55
1	894	55
1	895	58
1	896	54
1	897	54
1	898	54
1	899	55
1	900	55
1	901	55
1	902	55
1	903	56
1	904	56
1	905	56
1	906	55
1	907	54
1	908	54
1	909	54
1	910	57
1	911	56
1	912	56
1	913	56
1	914	56
1	915	56
1	916	56
1	917	56
1	918	56
1	919	57
1	920	57
1	921	57
1	922	57
1	923	57
1	924	57
1	925	57
1	926	57
1	927	56
1	928	57
1	929	59
1	930	57
1	931	56
1	932	56
1	933	56
1	934	56
1	935	56
1	936	55
1	937	58
1	938	58
1	939	57
1	940	56
1	941	56
1	942	56
1	943	58
1	944	59
1	945	59
1	946	59
1	947	59
1	948	59
1	949	59
1	950	58
1	951	57
1	952	57
1	953	58
1	954	57
1	955	59
1	956	59
1	957	59
1	958	59
1	959	60
1	960	60
1	961	60
1	962	60
1	963	60
1	964	60
1	965	61
1	966	62
1	967	61
1	968	61
1	969	61
1	970	59
1	971	59
1	972	59
1	973	60
1	974	60
1	975	59
1	976	62
1	977	62
1	978	62
1	979	64
1	980	64
1	981	64
1	982	66
1	983	66
1	984	66
1	985	66
1	986	65
1	987	67
1	988	67
1	989	69
1	990	67
1	991	65
1	992	65
1	993	65
1	994	62
1	995	62
1	996	64
1	997	63
1	998	63
1	999	61
1	1000	60
1	1001	62
1	1002	60
1	1003	59
1	1004	63
1	1005	65
1	1006	65
1	1007	65
1	1008	65
1	1009	67
1	1010	67
1	1011	67
1	1012	66
1	1013	68
1	1014	68
1	1015	70
1	1016	71
1	1017	70
1	1018	72
1	1019	74
1	1020	77
1	1021	77
1	1022	77
1	1023	77
1	1024	77
1	1025	78
1	1026	78
1	1027	79
1	1028	78
1	1029	77
1	1030	77
1	1031	77
1	1032	77
1	1033	77
1	1034	76
1	1035	76
1	1036	75
1	1037	75
1	1038	75
1	1039	77
1	1040	78
1	1041	81
1	1042	82
1	1043	82
1	1044	80
1	1045	83
1	1046	82
1	1047	82
1	1048	81
1	1049	83
1	1050	82
1	1051	82
1	1052	83
1	1053	83
1	1054	81
1	1055	79
1	1056	81
1	1057	82
1	1058	84
1	1059	86
1	1060	86
1	1061	85
1	1062	85
1	1063	85
1	1064	86
1	1065	87
1	1066	90
1	1067	90
1	1068	92
1	1069	92
1	1070	94
1	1071	95
1	1072	95
1	1073	98
1	1074	98
1	1075	98
1	1076	96
1	1077	96
1	1078	96
1	1079	96
1	1080	94
1	1081	95
1	1082	95
1	1083	96
1	1084	96
1	1085	96
1	1086	96
1	1087	98
1	1088	98
1	1089	98
1	1090	99
1	1091	97
1	1092	97
1	1093	97
1	1094	97
1	1095	96
1	1096	97
1	1097	97
1	1098	96
1	1099	97
1	1100	97
1	1101	97
1	1102	99
1	1103	99
1	1104	101
1	1105	101
1	1106	102
1	1107	104
1	1108	104
1	1109	102
1	1110	102
1	1111	102
1	1112	101
1	1113	101
1	1114	103
1	1115	103
1	1116	104
1	1117	102
1	1118	101
1	1119	100
1	1120	100
1	1121	99
1	1122	99
1	1123	102
1	1124	101
1	1125	100
1	1126	98
1	1127	94
1	1128	96
1	1129	94
1	1130	92
1	1131	92
1	1132	90
1	1133	89
1	1134	89
1	1135	89
1	1136	89
1	1137	90
1	1138	92
1	1139	92
1	1140	89
1	1141	88
1	1142	91
1	1143	91
1	1144	90
1	1145	90
1	1146	90
1	1147	91
1	1148	92
1	1149	93
1	1150	93
1	1151	91
1	1152	89
1	1153	89
1	1154	90
1	1155	90
1	1156	89
1	1157	90
1	1158	90
1	1159	90
1	1160	86
1	1161	86
1	1162	86
1	1163	86
1	1164	86
1	1165	86
1	1166	84
1	1167	83
1	1168	82
1	1169	81
1	1170	78
1	1171	77
1	1172	77
1	1173	76
1	1174	75
1	1175	75
1	1176	74
1	1177	76
1	1178	71
1	1179	71
1	1180	71
1	1181	69
1	1182	69
1	1183	69
1	1184	67
1	1185	67
1	1186	68
1	1187	68
1	1188	68
1	1189	68
1	1190	66
1	1191	63
1	1192	59
1	1193	59
1	1194	59
1	1195	59
1	1196	57
1	1197	57
1	1198	57
1	1199	55
1	1200	55
1	1201	55
1	1202	55
1	1203	55
1	1204	55
1	1205	55
1	1206	55
1	1207	56
1	1208	54
1	1209	54
1	1210	56
1	1211	56
1	1212	54
1	1213	54
1	1214	55
1	1215	53
1	1216	54
1	1217	56
1	1218	56
1	1219	54
1	1220	55
1	1221	54
1	1222	55
1	1223	56
1	1224	55
1	1225	55
1	1226	55
1	1227	55
1	1228	56
1	1229	55
1	1230	55
1	1231	55
1	1232	57
1	1233	59
1	1234	58
1	1235	58
1	1236	58
1	1237	58
1	1238	59
1	1239	57
1	1240	59
1	1241	59
1	1242	59
1	1243	59
1	1244	59
1	1245	59
1	1246	59
1	1247	61
1	1248	61
1	1249	63
1	1250	62
1	1251	62
1	1252	62
1	1253	62
1	1254	59
1	1255	57
1	1256	55
1	1257	55
1	1258	56
1	1259	56
1	1260	56
1	1261	55
1	1262	55
1	1263	55
1	1264	50
1	1265	49
1	1266	49
1	1267	48
1	1268	51
1	1269	51
1	1270	51
1	1271	52
1	1272	52
1	1273	52
1	1274	49
1	1275	51
1	1276	49
1	1277	49
1	1278	47
1	1279	47
1	1280	48
1	1281	50
1	1282	50
1	1283	50
1	1284	52
1	1285	52
1	1286	53
1	1287	53
1	1288	52
1	1289	49
1	1290	50
1	1291	50
1	1292	50
1	1293	49
1	1294	48
1	1295	48
1	1296	48
1	1297	48
1	1298	48
1	1299	47
1	1300	46
1	1301	46
1	1302	46
1	1303	46
1	1304	46
1	1305	45
1	1306	45
1	1307	45
1	1308	45
1	1309	46
1	1310	46
1	1311	46
1	1312	48
1	1313	53
1	1314	53
1	1315	53
1	1316	53
1	1317	54
1	1318	54
1	1319	55
1	1320	55
1	1321	55
1	1322	59
1	1323	60
1	1324	60
1	1325	62
1	1326	62
1	1327	64
1	1328	65
1	1329	65
1	1330	65
1	1331	67
1	1332	67
1	1333	67
1	1334	68
1	1335	66
1	1336	66
1	1337	61
1	1338	61
1	1339	63
1	1340	64
1	1341	64
1	1342	64
1	1343	64
1	1344	64
1	1345	63
1	1346	63
1	1347	64
1	1348	64
1	1349	64
1	1350	64
1	1351	63
1	1352	63
1	1353	66
1	1354	68
1	1355	69
1	1356	70
1	1357	71
1	1358	70
1	1359	69
1	1360	69
1	1361	70
1	1362	69
1	1363	69
1	1364	69
1	1365	68
1	1366	72
1	1367	70
1	1368	70
1	1369	71
1	1370	71
1	1371	71
1	1372	71
1	1373	70
1	1374	70
1	1375	71
1	1376	71
1	1377	68
1	1378	68
1	1379	67
1	1380	68
1	1381	68
1	1382	68
1	1383	67
1	1384	68
1	1385	70
1	1386	70
1	1387	70
1	1388	70
1	1389	69
1	1390	68
1	1391	68
1	1392	68
1	1393	68
1	1394	68
1	1395	68
1	1396	69
1	1397	69
1	1398	69
1	1399	69
1	1400	66
1	1401	66
1	1402	66
1	1403	66
1	1404	66
1	1405	66
1	1406	67
1	1407	67
1	1408	67
1	1409	66
1	1410	66
1	1411	66
1	1412	66
1	1413	68
1	1414	68
1	1415	68
1	1416	68
1	1417	69
1	1418	69
1	1419	69
1	1420	70
1	1421	70
1	1422	70
1	1423	70
1	1424	70
1	1425	70
1	1426	68
1	1427	68
1	1428	68
1	1429	68
1	1430	66
1	1431	67
1	1432	66
1	1433	65
1	1434	63
1	1435	62
1	1436	62
1	1437	61
1	1438	61
1	1439	63
1	1440	58
1	1441	57
1	1442	57
1	1443	57
1	1444	57
1	1445	55
1	1446	54
1	1447	54
1	1448	54
1	1449	54
1	1450	54
1	1451	56
1	1452	57
1	1453	57
1	1454	57
1	1455	51
1	1456	51
1	1457	51
1	1458	51
1	1459	53
1	1460	52
1	1461	53
1	1462	51
1	1463	52
1	1464	52
1	1465	52
1	1466	51
1	1467	50
1	1468	57
1	1469	59
1	1470	57
1	1471	57
1	1472	61
1	1473	59
1	1474	58
1	1475	58
1	1476	58
1	1477	56
1	1478	55
1	1479	55
1	1480	55
1	1481	55
1	1482	55
1	1483	56
1	1484	56
1	1485	55
1	1486	55
1	1487	55
1	1488	55
1	1489	55
1	1490	55
1	1491	55
1	1492	55
1	1493	55
1	1494	55
1	1495	55
1	1496	56
1	1497	56
1	1498	55
1	1499	57
1	1500	58
1	1501	58
1	1502	58
1	1503	60
1	1504	61
1	1505	61
1	1506	60
1	1507	60
1	1508	57
1	1509	59
1	1510	59
1	1511	59
1	1512	58
1	1513	58
1	1514	60
1	1515	60
1	1516	61
1	1517	58
1	1518	58
1	1519	58
1	1520	58
1	1521	59
1	1522	59
1	1523	60
1	1524	62
1	1525	62
1	1526	62
1	1527	62
1	1528	63
1	1529	63
1	1530	63
1	1531	64
1	1532	65
1	1533	63
1	1534	62
1	1535	60
1	1536	58
1	1537	58
1	1538	59
1	1539	59
1	1540	61
1	1541	61
1	1542	62
1	1543	62
1	1544	62
1	1545	62
1	1546	62
1	1547	62
1	1548	64
1	1549	65
1	1550	65
1	1551	66
1	1552	66
1	1553	65
1	1554	65
1	1555	66
1	1556	66
1	1557	67
1	1558	67
1	1559	67
1	1560	67
1	1561	67
1	1562	68
1	1563	71
1	1564	69
1	1565	69
1	1566	69
1	1567	69
1	1568	69
1	1569	69
1	1570	68
1	1571	68
1	1572	68
1	1573	69
1	1574	68
1	1575	66
1	1576	66
1	1577	69
1	1578	69
1	1579	70
1	1580	68
1	1581	66
1	1582	68
1	1583	69
1	1584	72
1	1585	72
1	1586	72
1	1587	70
1	1588	70
1	1589	70
1	1590	69
1	1591	70
1	1592	70
1	1593	70
1	1594	70
1	1595	70
1	1596	70
1	1597	70
1	1598	70
1	1599	70
1	1600	70
1	1601	70
1	1602	71
1	1603	70
1	1604	71
1	1605	71
1	1606	71
1	1607	71
1	1608	70
1	1609	70
1	1610	70
1	1611	71
1	1612	69
1	1613	72
1	1614	73
1	1615	73
1	1616	74
1	1617	74
1	1618	74
1	1619	71
1	1620	71
1	1621	70
1	1622	72
1	1623	70
1	1624	71
1	1625	71
1	1626	71
1	1627	70
1	1628	71
1	1629	73
1	1630	72
1	1631	72
1	1632	72
1	1633	72
1	1634	71
1	1635	71
1	1636	71
1	1637	70
1	1638	70
1	1639	69
1	1640	67
1	1641	66
1	1642	66
1	1643	68
1	1644	68
1	1645	67
1	1646	67
1	1647	67
1	1648	65
1	1649	66
1	1650	63
1	1651	63
1	1652	64
1	1653	64
1	1654	62
1	1655	59
1	1656	59
1	1657	59
1	1658	59
1	1659	60
1	1660	60
1	1661	60
1	1662	60
1	1663	60
1	1664	62
1	1665	63
1	1666	63
1	1667	62
1	1668	62
1	1669	64
1	1670	67
1	1671	69
1	1672	68
1	1673	68
1	1674	67
1	1675	67
1	1676	67
1	1677	67
1	1678	67
1	1679	69
1	1680	70
1	1681	72
1	1682	70
1	1683	70
1	1684	70
1	1685	70
1	1686	70
1	1687	70
1	1688	70
1	1689	69
1	1690	70
1	1691	70
1	1692	70
1	1693	70
1	1694	68
1	1695	68
1	1696	67
1	1697	67
1	1698	67
1	1699	67
1	1700	67
1	1701	67
1	1702	66
1	1703	69
1	1704	67
1	1705	69
1	1706	69
1	1707	73
1	1708	70
1	1709	70
1	1710	68
1	1711	68
1	1712	68
1	1713	70
1	1714	69
1	1715	69
1	1716	69
1	1717	69
1	1718	71
1	1719	71
1	1720	71
1	1721	71
1	1722	72
1	1723	73
1	1724	73
1	1725	73
1	1726	72
1	1727	72
1	1728	70
1	1729	71
1	1730	70
1	1731	70
1	1732	70
1	1733	70
1	1734	73
1	1735	70
1	1736	70
1	1737	69
1	1738	70
1	1739	68
1	1740	68
1	1741	68
1	1742	67
1	1743	67
1	1744	67
1	1745	68
1	1746	70
1	1747	70
1	1748	72
1	1749	75
1	1750	75
1	1751	75
1	1752	75
1	1753	78
1	1754	78
1	1755	79
1	1756	79
1	1757	81
1	1758	82
1	1759	81
1	1760	81
1	1761	83
1	1762	82
1	1763	82
1	1764	82
1	1765	80
1	1766	80
1	1767	81
1	1768	87
1	1769	87
1	1770	86
1	1771	86
1	1772	85
1	1773	83
1	1774	83
1	1775	85
1	1776	85
1	1777	85
1	1778	85
1	1779	86
1	1780	86
1	1781	86
1	1782	86
1	1783	87
1	1784	85
1	1785	85
1	1786	85
1	1787	85
1	1788	88
1	1789	88
1	1790	89
1	1791	89
1	1792	89
1	1793	87
1	1794	87
1	1795	87
1	1796	88
1	1797	87
1	1798	85
1	1799	87
1	1800	86
1	1801	86
1	1802	87
1	1803	87
1	1804	86
1	1805	86
1	1806	85
1	1807	84
1	1808	84
1	1809	85
1	1810	85
1	1811	85
1	1812	85
1	1813	85
1	1814	86
1	1815	83
1	1816	83
1	1817	81
1	1818	80
1	1819	80
1	1820	76
1	1821	75
1	1822	75
1	1823	76
1	1824	76
1	1825	75
1	1826	76
1	1827	76
1	1828	76
1	1829	75
1	1830	73
1	1831	70
1	1832	68
1	1833	68
1	1834	68
1	1835	68
1	1836	70
1	1837	70
1	1838	70
1	1839	70
1	1840	71
1	1841	67
1	1842	67
1	1843	67
1	1844	66
1	1845	67
1	1846	67
1	1847	67
1	1848	67
1	1849	67
1	1850	67
1	1851	67
1	1852	67
1	1853	67
1	1854	66
1	1855	66
1	1856	66
1	1857	66
1	1858	66
1	1859	66
1	1860	67
1	1861	67
1	1862	68
1	1863	68
1	1864	67
1	1865	67
1	1866	68
1	1867	68
1	1868	69
1	1869	69
1	1870	71
1	1871	71
1	1872	71
1	1873	72
1	1874	69
1	1875	70
1	1876	69
1	1877	67
1	1878	67
1	1879	67
1	1880	67
1	1881	69
1	1882	69
1	1883	69
1	1884	69
1	1885	65
1	1886	66
1	1887	68
1	1888	68
1	1889	67
1	1890	69
1	1891	70
1	1892	70
1	1893	70
1	1894	70
1	1895	71
1	1896	70
1	1897	68
1	1898	68
1	1899	69
1	1900	68
1	1901	68
1	1902	68
1	1903	68
1	1904	68
1	1905	67
1	1906	65
1	1907	64
1	1908	64
1	1909	61
1	1910	62
1	1911	62
1	1912	60
1	1913	60
1	1914	61
1	1915	63
1	1916	62
1	1917	62
1	1918	61
1	1919	57
1	1920	57
1	1921	57
1	1922	57
1	1923	58
1	1924	59
1	1925	59
1	1926	57
1	1927	60
1	1928	60
1	1929	60
1	1930	61
1	1931	61
1	1932	59
1	1933	59
1	1934	60
1	1935	60
1	1936	60
1	1937	60
1	1938	60
1	1939	57
1	1940	56
1	1941	56
1	1942	57
1	1943	57
1	1944	57
1	1945	57
1	1946	57
1	1947	56
1	1948	56
1	1949	57
1	1950	58
1	1951	58
1	1952	58
1	1953	58
1	1954	59
1	1955	62
1	1956	62
1	1957	62
1	1958	62
1	1959	62
1	1960	62
1	1961	62
1	1962	60
1	1963	61
1	1964	61
1	1965	60
1	1966	60
1	1967	60
1	1968	60
1	1969	59
1	1970	61
1	1971	61
1	1972	61
1	1973	63
1	1974	62
1	1975	62
1	1976	62
1	1977	61
1	1978	63
1	1979	64
1	1980	64
1	1981	64
1	1982	63
1	1983	64
1	1984	64
1	1985	64
1	1986	64
1	1987	62
1	1988	63
1	1989	63
1	1990	65
1	1991	65
1	1992	67
1	1993	66
1	1994	67
1	1995	68
1	1996	65
1	1997	63
1	1998	63
1	1999	63
1	2000	65
[truncated: 1,046,576+ more rows]

## Sheet: Table S21
Table S21. Code and algorithm parameters
Quality filtering and trimming
cutadapt parameters:
-m 60 --max-n 15 - a AGATCGGAAGAGCACACGTCTGAACTCCAGTCA -A AGATCGGAAGAGCGTCGTGTAGGGAAAGAGTGT.
prinseq parameters:
-trim_left 0 -trim_right 0 -lc_method dust -lc_threshold 7 -derep 1 -trim_qual_type mean -trim_qual_window 10 -trim_qual_step 2 -trim_qual_rule lt -trim_qual_left 30 -trim_qual_right 30 -min_len 60 -ns_max_n 15
Metagenomic assembly and MAG binning
metawrap assembly parameters:
-m 240 -l 500 –metaspades
metawrap binning parameters:
--metabat2 --maxbin2 --concoct
metawrap bin_refinement parameters:
-A metabat2_bins -B maxbin2_bins –C concoct_bins -c 50 -x 10
NCBI Genome and MAG CheckM
CheckM parameters:
lineage_wf --tab_table
NCBI Genome and MAG GTDB-tk
GTDB-tk parameters:
classify_wf
Metagenome and MAG Prokka
Prokka metagenome and MAG parameters:
--metagenome
NCBI Genome Prokka
Prokka metagenome and MAG parameters:
default parameters only
pulA BLASTn
BLASTn parameters:
-evalue 1e-05 -max_target_seqs 10 -outfmt '6 qseqid qacc qlen sseqid sacc slen title qstart qend sstart send length e-value bitscore pident qcovs nident mismatch positive gaps qframe sframe'.
Bowtie2 read mapping
bowtie2-build parameters:
--seed 1
bowtie2 parameters:
--sensitive-local --seed 1 -S
Samtools coverage and depth
samtools coverage parameters:
default parameters only
samtools depth parameters (pulA gene):
-r NZ_CP046311.1:1986082-1989861
samtools depth parameters (10 kb flanking pulA gene):
-r NZ_CP046311.1:1976082-1999861
RAxML (raxmlHPC)
Make bootstrap iterations trees:
raxmlHPC -m GTRCAT -p 12345 -b 12345 -N 1000
Create ML1 tree:
raxmlHPC -f d -m GTRCAT -N 1 -n ML1 -p 12388
Create bootstrap tree:
raxmlHPC -m GTRCAT -f b -n finalML1_boot1000
Footnotes:
All software programs used default parameters unless specified.
