# Supplementary material for: Resolving glycogen and related enzymes reveals correlates of Lactobacillus crispatus dominance in a cohort of young African women
Source: Research Square preprint supplement (doi:10.21203/rs.3.rs-1679828/v1), 2022-05-25
Supplement: Supplementary file 4 [file 3400af901f8ca05c69416f7a.xlsx]

## Sheet: Table S1
Table S1. Participant clinical and demographic metadata
Participant ID	Days since Last Menstrual Period	Age at Enrollment	Sexual Debut	Age at Sexual Debut	Sex in Last 3 Months†	Years of School Completed	Running Water	Concrete Floors	Electricity	Bacterial Vaginosis*	Nugent Score	STI Summary
1	15	18.6	no			8	no	no	no	negative	0
2	12	20.7	no			10	no	yes	no	negative	0
3	27	19.5	no			12	yes	yes	no	negative	0
4	4	20.7	no			12	no	yes	no	negative	4
5	11	18.6	no			12	yes	yes	no	negative	0
6	14	18.3	no			12	no	yes	yes	negative	0
7	5	18.8	no			8	no	yes	yes	negative	1
8	10	18.4	no			11	no	no	no	negative	0
9	17	18.3	no			11	no	yes	no	negative	0
10	22	19.1	no			11	yes	no	yes	negative	0
11	10	19.8	yes	18.3452	0	12	no	no	no	negative	0
12	8	19.5	no			13	no	no	no	negative	0
13	12	16.4	no			10	no	no	yes	negative	0	Candida (yeast)
14	5	18.9	yes	18.3548	0	12	yes	yes	yes	negative	0
15	39	18.5	yes	17.511	1	12	no	yes	no	negative	0	Trichomonas
16	8	20.5	no			12	no	no	no	negative	1
17	8	17.8	yes	14.7068	0	12	yes	yes	yes	negative	0
† Reported number of times
* Negative = Nugent score ≤6

## Sheet: Table S2
Table S2. Biomolecule measurements in vaginal swab supernatants
Participant ID	Total Protein (µg/mL)*	D-Lactic Acid (µg/ng protein)	L-Lactic Acid (µg/ng protein)	Total Lactic Acid (µg/ng protein)	Glycogen (µg/ng protein)	Maltodextrin (µg/ng protein)	Human α-Amylase Concentration (mU/ng protein)	Pullulanase Activity (U/ng protein)	Amylopullulanase Activity (Fluor/s/ng protein)	α-Glucosidase Activity (mU/ng protein)	α-Amylase Activity (mU/ng protein)
1	219.127	257.07	116.401	373.47	63.925	153.181	6.49823	67.7709	213.506	34.457	0.912713
2	164.241	518.768	187.23	705.998	3871.25	1004.97	10.6029	762.052	347.058	51.6166	17.8812
3	58.2121	19.9271	108.778	128.705	2750.58	3471.9	13.7599	34.3571	935.412	121.148	37.5513
4	119.751	322.224	250.819	573.043	2416.39	1109.49	7.54834	31.6626	488.135	41.3773	13.6756
5	246.57	135.148	687.382	822.529	3716.92	190.884	4.79862	70.6601	171.147	34.119	0.81113
6	131.809	199.195	245.959	445.154	3611.07	836.057	6.95025	29.3604	289.112	0.076626	1.51735
7	1014.14	33.8967	20.2148	54.1116	451.684	184.16	1.00348	82.0663	56.7526	0.824204	7.65577
8	373.805	226.728	96.2943	323.022	2452.14	189.497	11.3809	97.116	150.936	50.3515	5.08255
9	58.6279	19.7858	72.1587	91.9445	154.861	2438.69	14.188	8.55175	685.209	33.9322	27.9332
10	77.7547	413.098	254.46	667.558	7818.04	355.922	1.83021	131.38	330.812	74.6168	21.3685
11	301.455	397.869	325.793	723.663	3178.07	100.664	2.69745	109.249	57.4193	17.9125	0.663448
12	482.329	249.916	77.0992	327.015	1520.81	487.364	2.31744	6.56172	95.349	0.041466	0.414655
13	114.761	257.613	120.476	378.089	2.17844	1095.66	23.1369	289.025	715.169	192.409	30.1606
14	716.008	267.691	144.824	412.515	2352.7	67.1742	1.3764	45.3399	48.0373	25.6238	4.09335
15	501.039	417.658	228.845	646.503	1069.4	132.94	2.68323	99.0878	92.3562	23.7488	6.14693
16	755.094	48.5126	91.2358	139.748	1480.78	334.535	1.05769	15.1887	71.2738	15.3446	4.69438
17	368.815	89.9446	207.474	297.419	1364.36	0.677847	3.70403	8.36887	137.705	11.1365	0.542277
* All biomolecule measurements were normalized to total protein concentration
Bolded values were below the limit of detection and were replaced with a value equal to half the lower limit of the standard curve before normalizing to total protein concentration

## Sheet: Table S3
Table S3. Biomolecule and bacterial abundance measurements in vaginal swab pellets
Participant ID	Pullulanase Activity (U/ng protein)	Amylopullulanase Activity (Fluor/s/ng protein)	α-Glucosidase Activity (mU/ng protein)	α-Amylase Activity (mU/ng protein)	Bacterial Abundance (mean 16S rRNA gene copies/swab)
1	ND	26.8193	27.3129	ND	4.30934e+07
2	NT	NT	NT	NT	156407994
3	ND	136.219	15.2005	ND	1.31383e+07
4	ND	62.2657	36.0986	ND	179991119
5	ND	24.4369	13.123	ND	670328677
6	ND	42.4513	35.3821	ND	8.71445e+07
7	NT	NT	NT	NT	2.93293e+06
8	ND	14.7358	2.82623	ND	83819908
9	ND	106.867	58.4437	ND	2.7104e+07
10	ND	54.7184	33.5003	ND	8.28118e+07
11	ND	13.8362	7.04441	ND	129757121
12	ND	14.635	8.79741	ND	115728158
13	NT	NT	NT	NT	3.25518e+07
14	ND	5.6497	7.69993	ND	1740203252
15	ND	7.02193	9.8474	ND	1884122514
16	ND	5.94594	8.19659	ND	4.26604e+07
17	NT	NT	NT	NT	218845301
ND = not detected
NT = not tested

## Sheet: Table S4
Table S4. Raw MetaPhlAn3 bacterial species read counts
Clade Name	Clade Taxid	Zymo Control	1	2	3	4	5	6	7	8	9	10	11	12	13	14	15	16	17
UNKNOWN		11300358	1361803	1960790	546821	1149871	2950184	877568	1844612	3553132	969668	3382161	4827121	866228	2839986	3933520	4146837	618191	946383
Alloscardovia_omnicolens	2|201174|1760|85004|31953|419014|419015	0	0	0	0	0	0	0	0	0	0	0	0	0	0	0	0	56	0
Bifidobacterium_breve	2|201174|1760|85004|31953|1678|1685	0	0	0	610565	0	0	0	0	0	0	0	0	235991	0	0	0	0	0
Gardnerella_vaginalis	2|201174|1760|85004|31953|2701|2702	0	0	0	0	660961	0	0	0	38758	588490	0	355	0	0	0	0	0	0
Corynebacterium_aurimucosum	2|201174|1760|85007|1653|1716|169292	0	175	0	0	0	0	0	0	0	0	0	0	0	0	0	0	0	0
Corynebacterium_coyleae	2|201174|1760|85007|1653|1716|53374	0	2294	0	0	0	0	0	0	0	0	0	0	0	0	0	0	0	0
Corynebacterium_imitans	2|201174|1760|85007|1653|1716|156978	0	1665	0	0	0	0	0	0	0	0	0	0	0	0	0	0	0	0
Corynebacterium_tuscaniense	2|201174|1760|85007|1653|1716|302449	0	142	0	0	0	0	0	0	0	0	0	0	0	0	0	0	0	0
Porphyromonas_sp_HMSC065F10	2|976|200643|171549|171551|836|1739394	0	226	0	0	0	0	0	0	0	0	0	0	0	0	0	0	0	0
Prevotella_buccalis	2|976|200643|171549|171552|838|28127	0	0	0	0	0	0	83	0	0	0	0	0	0	0	0	0	0	0
Prevotella_timonensis	2|976|200643|171549|171552|838|386414	0	2007	0	0	0	0	0	0	0	0	0	0	0	0	0	0	0	0
Bacillus_intestinalis	2|1239|91061|1385|186817|1386|1963032	6548972	0	0	0	0	0	0	0	0	0	0	0	0	0	0	0	0	0
Listeria_monocytogenes	2|1239|91061|1385|186820|1637|1639	2963611	0	0	0	0	0	0	0	0	0	0	0	0	0	0	0	0	0
Staphylococcus_argenteus	2|1239|91061|1385|90964|1279|985002	37920	0	0	0	0	0	0	0	0	0	0	0	0	0	0	0	0	0
Staphylococcus_aureus	2|1239|91061|1385|90964|1279|1280	4807363	0	0	0	0	0	0	0	0	0	0	0	0	0	0	0	0	0
Enterococcus_faecalis	2|1239|91061|186826|81852|1350|1351	6072346	0	0	0	0	0	0	246	0	0	0	0	0	0	0	0	0	0
Lactobacillus_coleohominis	2|1239|91061|186826|33958|1578|181675	0	1161	0	0	0	13713	0	0	0	0	0	515	0	33860	0	0	0	2580
Lactobacillus_crispatus	2|1239|91061|186826|33958|1578|47770	*1402	725297	1663023	611	337483	490	712074	1440557	3855239	1666	3953008	7126187	477761	3358122	4887656	3145581	3318	1518
Lactobacillus_fermentum	2|1239|91061|186826|33958|1578|1613	6672700	0	0	0	0	0	58	0	0	0	109	0	0	0	0	415	0	0
Lactobacillus_gasseri	2|1239|91061|186826|33958|1578|1596	0	0	0	0	0	0	0	0	0	0	10534	0	0	0	0	0	0	20908
Lactobacillus_iners	2|1239|91061|186826|33958|1578|147802	*196	377142	0	0	0	5428210	118	588543	0	0	17696	0	943	0	61	524	498	1335897
Lactobacillus_jensenii	2|1239|91061|186826|33958|1578|109790	0	142668	0	0	5111	0	0	0	0	0	0	0	0	0	0	0	0	0
Lactobacillus_johnsonii	2|1239|91061|186826|33958|1578|33959	0	0	0	0	0	0	0	0	0	0	0	0	0	0	0	0	97462	0
Lactobacillus_oris	2|1239|91061|186826|33958|1578|1632	0	0	0	0	0	0	0	0	0	0	0	0	0	6953	0	0	0	0
Lactobacillus_paragasseri	2|1239|91061|186826|33958|1578|2107999	0	0	0	0	0	0	0	0	0	645474	1098	0	0	0	0	0	0	0
Lactobacillus_reuteri	2|1239|91061|186826|33958|1578|1598	0	0	0	0	0	0	0	0	0	0	0	0	24710	0	0	0	0	0
Lactobacillus_vaginalis	2|1239|91061|186826|33958|1578|1633	0	23	226	0	0	0	0	0	0	0	860	1211	0	1279	1574	3558	30078	0
Streptococcus_agalactiae	2|1239|91061|186826|1300|1301|1311	0	0	0	0	0	0	0	0	0	0	0	0	0	0	0	0	23876	0
Dialister_micraerophilus	2|1239|909932|1843489|31977|39948|309120	0	0	0	0	0	0	0	0	0	0	0	0	0	0	0	0	1122	0
Anaerococcus_hydrogenalis	2|1239|1737404|1737405|1570339|165779|33029	0	113	0	0	0	0	0	0	0	0	0	0	0	0	0	0	0	0
Anaerococcus_vaginalis	2|1239|1737404|1737405|1570339|165779|33037	0	669	0	0	0	0	0	0	0	0	0	0	0	0	0	0	0	0
Escherichia_coli	2|1224|1236|91347|543|561|562	1456513	0	0	0	0	0	0	0	0	0	0	0	0	0	0	0	0	0
Salmonella_enterica	2|1224|1236|91347|543|590|28901	916308	0	0	0	0	0	0	0	0	0	0	0	0	0	0	0	0	0
Pseudomonas_aeruginosa_group	2|1224|1236|72274|135621|286|136841	329160	0	0	0	0	0	0	0	0	0	0	0	0	0	0	0	0	0
Ureaplasma_parvum	2|544448|31969|2085|2092|2129|134821	0	0	0	0	3639	0	0	0	0	0	409	0	0	12227	1608	122	0	501
Ureaplasma_urealyticum	2|544448|31969|2085|2092|2129|2130	0	0	0	0	0	0	0	0	0	102	0	0	0	1520	0	0	0	0
Candida_albicans	2759|4890|4891|4892|766764|1535326|5476	0	0	0	0	0	0	0	0	0	0	0	0	0	104302	0	0	0	0
Saccharomyces_cerevisiae	2759|4890|4891|4892|4893|4930|4932	2242503	0	0	0	0	0	0	0	0	0	0	0	0	0	0	0	0	0
Cryptococcus_neoformans	2759|5204|155616|5234|1884633|5206|5207	165327	0	0	0	0	0	0	0	0	0	0	0	0	0	0	0	0	0
Trichomonas_vaginalis	2759|||37104|181550|5721|5722	0	0	0	0	0	0	0	0	0	0	0	0	0	0	0	58309	0	0
* Highly prevalent/abundant taxa in Zymo control due to barcode hopping

## Sheet: Table S5
Table S5. Barcode hopping-adjusted MetaPhlAn3 bacterial species read counts
Clade Name	Clade Taxid	1	2	3	4	5	6	7	8	9	10	11	12	13	14	15	16	17
UNKNOWN		1361803	1960790	546821	1149871	2950184	877568	1844612	3553132	969668	3382161	4827121	866228	2839986	3933520	4146837	618191	946383
Alloscardovia_omnicolens	2|201174|1760|85004|31953|419014|419015	0	0	0	0	0	0	0	0	0	0	0	0	0	0	0	56	0
Bifidobacterium_breve	2|201174|1760|85004|31953|1678|1685	0	0	610565	0	0	0	0	0	0	0	0	235991	0	0	0	0	0
Gardnerella_vaginalis	2|201174|1760|85004|31953|2701|2702	0	0	0	660961	0	0	0	38758	588490	0	355	0	0	0	0	0	0
Corynebacterium_aurimucosum	2|201174|1760|85007|1653|1716|169292	175	0	0	0	0	0	0	0	0	0	0	0	0	0	0	0	0
Corynebacterium_coyleae	2|201174|1760|85007|1653|1716|53374	2294	0	0	0	0	0	0	0	0	0	0	0	0	0	0	0	0
Corynebacterium_imitans	2|201174|1760|85007|1653|1716|156978	1665	0	0	0	0	0	0	0	0	0	0	0	0	0	0	0	0
Corynebacterium_tuscaniense	2|201174|1760|85007|1653|1716|302449	142	0	0	0	0	0	0	0	0	0	0	0	0	0	0	0	0
Porphyromonas_sp_HMSC065F10	2|976|200643|171549|171551|836|1739394	226	0	0	0	0	0	0	0	0	0	0	0	0	0	0	0	0
Prevotella_buccalis	2|976|200643|171549|171552|838|28127	0	0	0	0	0	83	0	0	0	0	0	0	0	0	0	0	0
Prevotella_timonensis	2|976|200643|171549|171552|838|386414	2007	0	0	0	0	0	0	0	0	0	0	0	0	0	0	0	0
Bacillus_intestinalis	2|1239|91061|1385|186817|1386|1963032	0	0	0	0	0	0	0	0	0	0	0	0	0	0	0	0	0
Listeria_monocytogenes	2|1239|91061|1385|186820|1637|1639	0	0	0	0	0	0	0	0	0	0	0	0	0	0	0	0	0
Staphylococcus_argenteus	2|1239|91061|1385|90964|1279|985002	0	0	0	0	0	0	0	0	0	0	0	0	0	0	0	0	0
Staphylococcus_aureus	2|1239|91061|1385|90964|1279|1280	0	0	0	0	0	0	0	0	0	0	0	0	0	0	0	0	0
Enterococcus_faecalis	2|1239|91061|186826|81852|1350|1351	0	0	0	0	0	0	246	0	0	0	0	0	0	0	0	0	0
Lactobacillus_coleohominis	2|1239|91061|186826|33958|1578|181675	1161	0	0	0	13713	0	0	0	0	0	515	0	33860	0	0	0	2580
Lactobacillus_crispatus*	2|1239|91061|186826|33958|1578|47770	719841	1.65578e+06	0	333100	0	708974	1.43173e+06	3.83829e+06	0	3.93567e+06	7.09516e+06	474543	3.34281e+06	4.86637e+06	3.13162e+06	2637.29	0
Lactobacillus_fermentum	2|1239|91061|186826|33958|1578|1613	0	0	0	0	0	58	0	0	0	109	0	0	0	0	415	0	0
Lactobacillus_gasseri	2|1239|91061|186826|33958|1578|1596	0	0	0	0	0	0	0	0	0	10534	0	0	0	0	0	0	20908
Lactobacillus_iners*	2|1239|91061|186826|33958|1578|147802	377139	0	0	0	5.4282e+06	116.114	588538	0	0	17685.5	0	941.042	0	48.0493	515.504	497.586	1.33589e+06
Lactobacillus_jensenii	2|1239|91061|186826|33958|1578|109790	142668	0	0	5111	0	0	0	0	0	0	0	0	0	0	0	0	0
Lactobacillus_johnsonii	2|1239|91061|186826|33958|1578|33959	0	0	0	0	0	0	0	0	0	0	0	0	0	0	0	97462	0
Lactobacillus_oris	2|1239|91061|186826|33958|1578|1632	0	0	0	0	0	0	0	0	0	0	0	0	6953	0	0	0	0
Lactobacillus_paragasseri	2|1239|91061|186826|33958|1578|2107999	0	0	0	0	0	0	0	0	645474	1098	0	0	0	0	0	0	0
Lactobacillus_reuteri	2|1239|91061|186826|33958|1578|1598	0	0	0	0	0	0	0	0	0	0	0	24710	0	0	0	0	0
Lactobacillus_vaginalis	2|1239|91061|186826|33958|1578|1633	23	226	0	0	0	0	0	0	0	860	1211	0	1279	1574	3558	30078	0
Streptococcus_agalactiae	2|1239|91061|186826|1300|1301|1311	0	0	0	0	0	0	0	0	0	0	0	0	0	0	0	23876	0
Dialister_micraerophilus	2|1239|909932|1843489|31977|39948|309120	0	0	0	0	0	0	0	0	0	0	0	0	0	0	0	1122	0
Anaerococcus_hydrogenalis	2|1239|1737404|1737405|1570339|165779|33029	113	0	0	0	0	0	0	0	0	0	0	0	0	0	0	0	0
Anaerococcus_vaginalis	2|1239|1737404|1737405|1570339|165779|33037	669	0	0	0	0	0	0	0	0	0	0	0	0	0	0	0	0
Escherichia_coli	2|1224|1236|91347|543|561|562	0	0	0	0	0	0	0	0	0	0	0	0	0	0	0	0	0
Salmonella_enterica	2|1224|1236|91347|543|590|28901	0	0	0	0	0	0	0	0	0	0	0	0	0	0	0	0	0
Pseudomonas_aeruginosa_group	2|1224|1236|72274|135621|286|136841	0	0	0	0	0	0	0	0	0	0	0	0	0	0	0	0	0
Ureaplasma_parvum	2|544448|31969|2085|2092|2129|134821	0	0	0	3639	0	0	0	0	0	409	0	0	12227	1608	122	0	501
Ureaplasma_urealyticum	2|544448|31969|2085|2092|2129|2130	0	0	0	0	0	0	0	0	102	0	0	0	1520	0	0	0	0
Candida_albicans	2759|4890|4891|4892|766764|1535326|5476	0	0	0	0	0	0	0	0	0	0	0	0	104302	0	0	0	0
Saccharomyces_cerevisiae	2759|4890|4891|4892|4893|4930|4932	0	0	0	0	0	0	0	0	0	0	0	0	0	0	0	0	0
Cryptococcus_neoformans	2759|5204|155616|5234|1884633|5206|5207	0	0	0	0	0	0	0	0	0	0	0	0	0	0	0	0	0
Trichomonas_vaginalis	2759|||37104|181550|5721|5722	0	0	0	0	0	0	0	0	0	0	0	0	0	0	58309	0	0
* Taxa with counts adjusted for barcode hopping

## Sheet: Table S6
Table S6. Kenyan Girls Health Study metagenome BLASTn results
Participant ID	Query Name (pulA Gene)*	Subject Name (Contig Sequence)	Query Start	Query End	Subject Start	Subject End	Alignment Length	Expected Value	Percent Identity	Query Coverage
1	RL03 LVM Lactobacillus crispatus (GCF_004361385) [type I pullulanase]	N/A	N/A	N/A	N/A	N/A	N/A	N/A	N/A	N/A
2	RL03 LVM Lactobacillus crispatus (GCF_004361385) [type I pullulanase]	NODE_117_length_5132_cov_71.354934	1	3780	4891	1112	3780	0	100	100
3	RL03 LVM Lactobacillus crispatus (GCF_004361385) [type I pullulanase]	N/A	N/A	N/A	N/A	N/A	N/A	N/A	N/A	N/A
4	RL03 LVM Lactobacillus crispatus (GCF_004361385) [type I pullulanase]	NODE_170_length_5280_cov_14.775502	1	3780	4979	1200	3780	0	99.656	100
5	RL03 LVM Lactobacillus crispatus (GCF_004361385) [type I pullulanase]	N/A	N/A	N/A	N/A	N/A	N/A	N/A	N/A	N/A
6	RL03 LVM Lactobacillus crispatus (GCF_004361385) [type I pullulanase]	N/A	N/A	N/A	N/A	N/A	N/A	N/A	N/A	N/A
7	RL03 LVM Lactobacillus crispatus (GCF_004361385) [type I pullulanase]	NODE_118_length_5502_cov_68.942537	1	3780	302	4081	3780	0	99.656	100
8	RL03 LVM Lactobacillus crispatus (GCF_004361385) [type I pullulanase]	NODE_116_length_5154_cov_180.259070	1	3780	4886	1107	3780	0	99.974	100
9	RL03 LVM Lactobacillus crispatus (GCF_004361385) [type I pullulanase]	N/A	N/A	N/A	N/A	N/A	N/A	N/A	N/A	N/A
10	RL03 LVM Lactobacillus crispatus (GCF_004361385) [type I pullulanase]	NODE_117_length_5200_cov_84.411467	1	3780	303	4082	3780	0	99.656	100
11	RL03 LVM Lactobacillus crispatus (GCF_004361385) [type I pullulanase]	NODE_194_length_5123_cov_124.669100	1	3780	228	4007	3780	0	99.656	100
12	RL03 LVM Lactobacillus crispatus (GCF_004361385) [type I pullulanase]	N/A	N/A	N/A	N/A	N/A	N/A	N/A	N/A	N/A
13	RL03 LVM Lactobacillus crispatus (GCF_004361385) [type I pullulanase]	NODE_116_length_5195_cov_151.687354	1	3780	4894	1115	3780	0	99.656	100
14	RL03 LVM Lactobacillus crispatus (GCF_004361385) [type I pullulanase]	NODE_129_length_5159_cov_236.551332	1	3780	269	4048	3780	0	99.868	100
15	RL03 LVM Lactobacillus crispatus (GCF_004361385) [type I pullulanase]	NODE_356_length_3666_cov_48.823872	1	3386	3439	54	3386	0	99.646	90
15	RL03 LVM Lactobacillus crispatus (GCF_004361385) [type I pullulanase]	NODE_803_length_1568_cov_50.280238	3378	3780	53	455	403	0	99.752	11
16	RL03 LVM Lactobacillus crispatus (GCF_004361385) [type I pullulanase]	N/A	N/A	N/A	N/A	N/A	N/A	N/A	N/A	N/A
17	RL03 LVM Lactobacillus crispatus (GCF_004361385) [type I pullulanase]	N/A	N/A	N/A	N/A	N/A	N/A	N/A	N/A	N/A
Footnotes:
* Fully functional pullulanase type I (pulA) gene from the RL03 Lactobacillus crispatus genome (GCF_004361385, van der Veer et al., Microbiome, 2019)
N/A = no BLASTn hit to the pulA gene

## Sheet: Table S7
Table S7. Kenyan Girls Health Study MAG BLASTn results
Participant ID	MAG ID	Bin ID	GTDB-tk Classification	Query Name (pulA Gene)*	Subject Name (Contig Sequence)	Query Start	Query End	Subject Start	Subject End	Alignment Length	Expected Value	Percent Identity	Query Coverage
1	KGHS_1_bin.1	1	Lactobacillus iners	RL03 LVM Lactobacillus crispatus (GCF_004361385) [type I pullulanase]	N/A	N/A	N/A	N/A	N/A	N/A	N/A	N/A	N/A
1	KGHS_1_bin.2	2	Lactobacillus	RL03 LVM Lactobacillus crispatus (GCF_004361385) [type I pullulanase]	N/A	N/A	N/A	N/A	N/A	N/A	N/A	N/A	N/A
1	KGHS_1_bin.3	3	Lactobacillus crispatus	RL03 LVM Lactobacillus crispatus (GCF_004361385) [type I pullulanase]	N/A	N/A	N/A	N/A	N/A	N/A	N/A	N/A	N/A
1	KGHS_1_bin.4	4	Lactobacillus mulieris	RL03 LVM Lactobacillus crispatus (GCF_004361385) [type I pullulanase]	N/A	N/A	N/A	N/A	N/A	N/A	N/A	N/A	N/A
2	KGHS_2_bin.1	1	Lactobacillus crispatus	RL03 LVM Lactobacillus crispatus (GCF_004361385) [type I pullulanase]	NODE_117_length_5132_cov_71.354934	1	3780	4891	1112	3780	0	100	100
3	KGHS_3_bin.1	1	Bifidobacterium breve	RL03 LVM Lactobacillus crispatus (GCF_004361385) [type I pullulanase]	N/A	N/A	N/A	N/A	N/A	N/A	N/A	N/A	N/A
4	KGHS_4_bin.1	1	Lactobacillus crispatus	RL03 LVM Lactobacillus crispatus (GCF_004361385) [type I pullulanase]	NODE_170_length_5280_cov_14.775502	1	3780	4979	1200	3780	0	99.656	100
5	KGHS_5_bin.1	1	Lactobacillus iners	RL03 LVM Lactobacillus crispatus (GCF_004361385) [type I pullulanase]	N/A	N/A	N/A	N/A	N/A	N/A	N/A	N/A	N/A
6	KGHS_6_bin.2	2	Lactobacillus crispatus	RL03 LVM Lactobacillus crispatus (GCF_004361385) [type I pullulanase]	N/A	N/A	N/A	N/A	N/A	N/A	N/A	N/A	N/A
7	KGHS_7_bin.1	1	Lactobacillus crispatus	RL03 LVM Lactobacillus crispatus (GCF_004361385) [type I pullulanase]	N/A	N/A	N/A	N/A	N/A	N/A	N/A	N/A	N/A
8	KGHS_8_bin.1	1	Bifidobacterium vaginale†	RL03 LVM Lactobacillus crispatus (GCF_004361385) [type I pullulanase]	N/A	N/A	N/A	N/A	N/A	N/A	N/A	N/A	N/A
8	KGHS_8_bin.2	2	Lactobacillus crispatus	RL03 LVM Lactobacillus crispatus (GCF_004361385) [type I pullulanase]	NODE_116_length_5154_cov_180.259070	1	3780	4886	1107	3780	0	99.974	100
9	KGHS_9_bin.1	1	Lactobacillus paragasseri	RL03 LVM Lactobacillus crispatus (GCF_004361385) [type I pullulanase]	N/A	N/A	N/A	N/A	N/A	N/A	N/A	N/A	N/A
9	KGHS_9_bin.2	2	Bifidobacterium vaginale†	RL03 LVM Lactobacillus crispatus (GCF_004361385) [type I pullulanase]	N/A	N/A	N/A	N/A	N/A	N/A	N/A	N/A	N/A
10	KGHS_10_bin.1	1	Lactobacillus crispatus	RL03 LVM Lactobacillus crispatus (GCF_004361385) [type I pullulanase]	N/A	N/A	N/A	N/A	N/A	N/A	N/A	N/A	N/A
11	KGHS_11_bin.1	1	Limosilactobacillus	RL03 LVM Lactobacillus crispatus (GCF_004361385) [type I pullulanase]	N/A	N/A	N/A	N/A	N/A	N/A	N/A	N/A	N/A
11	KGHS_11_bin.2	2	Lactobacillus crispatus	RL03 LVM Lactobacillus crispatus (GCF_004361385) [type I pullulanase]	NODE_194_length_5123_cov_124.669100	1	3780	228	4007	3780	0	99.656	100
12	KGHS_12_bin.1	1	Bifidobacterium breve	RL03 LVM Lactobacillus crispatus (GCF_004361385) [type I pullulanase]	N/A	N/A	N/A	N/A	N/A	N/A	N/A	N/A	N/A
12	KGHS_12_bin.2	2	Lactobacillus crispatus	RL03 LVM Lactobacillus crispatus (GCF_004361385) [type I pullulanase]	N/A	N/A	N/A	N/A	N/A	N/A	N/A	N/A	N/A
13	KGHS_13_bin.1	1	Lactobacillus crispatus	RL03 LVM Lactobacillus crispatus (GCF_004361385) [type I pullulanase]	NODE_116_length_5195_cov_151.687354	1	3780	4894	1115	3780	0	99.656	100
14	KGHS_14_bin.1	1	Lactobacillus crispatus	RL03 LVM Lactobacillus crispatus (GCF_004361385) [type I pullulanase]	NODE_129_length_5159_cov_236.551332	1	3780	269	4048	3780	0	99.868	100
15	KGHS_15_bin.1‡	1	Limosilactobacillus vaginalis_A	RL03 LVM Lactobacillus crispatus (GCF_004361385) [type I pullulanase]	NODE_356_length_3666_cov_48.823872	1	3386	3439	54	3386	0	99.646	90
15	KGHS_15_bin.1‡	1	Limosilactobacillus vaginalis_A	RL03 LVM Lactobacillus crispatus (GCF_004361385) [type I pullulanase]	NODE_803_length_1568_cov_50.280238	3378	3780	53	455	403	0	99.752	11
15	KGHS_15_bin.2	2	Lactobacillus crispatus	RL03 LVM Lactobacillus crispatus (GCF_004361385) [type I pullulanase]	N/A	N/A	N/A	N/A	N/A	N/A	N/A	N/A	N/A
16	KGHS_16_bin.1	1	Lactobacillus johnsonii	RL03 LVM Lactobacillus crispatus (GCF_004361385) [type I pullulanase]	N/A	N/A	N/A	N/A	N/A	N/A	N/A	N/A	N/A
17	KGHS_17_bin.1	1	Lactobacillus iners	RL03 LVM Lactobacillus crispatus (GCF_004361385) [type I pullulanase]	N/A	N/A	N/A	N/A	N/A	N/A	N/A	N/A	N/A
Footnotes:
* Fully functional pullulanase type I (pulA) gene from the RL03 Lactobacillus crispatus genome (GCF_004361385, van der Veer et al., Microbiome, 2019)
† Bifidobacterium vaginale = GTDB-tk classification of Gardnerella vaginalis
‡ KGHS_15_bin.1 was classified as Limosilactobacillus vaginalis_A by GTDB-tk (species formerly known as Lactobacillus vaginalis) but the contig containing the pulA gene was classified as Lactobacillus crispatus using BLASTn
N/A = no BLASTN hit to the pulA gene
MAG = metagenome-assembled genome
Samples 1, 3, 5, 6, 12, 16 and 17 did not have a BLASTn hit to the pulA gene
Samples 1, 6, 10 and 12 did not have a BLASTn hit to the pulA gene despite being dominant for Lactobacillus crispatus

## Sheet: Table S8
Table S8. pulA gene coverage in Kenyan Girls Health Study metagenomes
Participant ID	Target Name (pulA Gene)*	Start Position	End Position	Number Reads Aligned	Number of Covered Bases	Proportion of Covered Bases	Mean Depth of Coverage	Mean baseQ in Covered Region	Mean mapQ of Selected Rreads
1	NZ_CP046311.1 [Lactobacillus crispatus strain FDAARGOS_743]	1986082	1989861	2	184	4.86772	0.0798942	36.8	44
2	NZ_CP046311.1 [Lactobacillus crispatus strain FDAARGOS_743]	1986082	1989861	3469	3780	100	120.261	39.1	43.9
3	NZ_CP046311.1 [Lactobacillus crispatus strain FDAARGOS_743]	1986082	1989861	2	214	5.66138	0.078836	36.4	44
4	NZ_CP046311.1 [Lactobacillus crispatus strain FDAARGOS_743]	1986082	1989861	716	3780	100	24.3823	39.3	43.9
5	NZ_CP046311.1 [Lactobacillus crispatus strain FDAARGOS_743]	1986082	1989861	0	0	0	0	0	0
6	NZ_CP046311.1 [Lactobacillus crispatus strain FDAARGOS_743]	1986082	1989861	2	185	4.89418	0.0798942	38.4	44
7	NZ_CP046311.1 [Lactobacillus crispatus strain FDAARGOS_743]	1986082	1989861	3259	3780	100	114.982	39.2	43.9
8	NZ_CP046311.1 [Lactobacillus crispatus strain FDAARGOS_743]	1986082	1989861	8761	3780	100	304.351	39.3	43.9
9	NZ_CP046311.1 [Lactobacillus crispatus strain FDAARGOS_743]	1986082	1989861	0	0	0	0	0	0
10	NZ_CP046311.1 [Lactobacillus crispatus strain FDAARGOS_743]	1986082	1989861	4060	3780	100	142.732	39.3	44
11	NZ_CP046311.1 [Lactobacillus crispatus strain FDAARGOS_743]	1986082	1989861	6146	3780	100	217.408	39.2	44
12	NZ_CP046311.1 [Lactobacillus crispatus strain FDAARGOS_743]	1986082	1989861	0	0	0	0	0	0
13	NZ_CP046311.1 [Lactobacillus crispatus strain FDAARGOS_743]	1986082	1989861	7354	3780	100	259.791	39.3	44
14	NZ_CP046311.1 [Lactobacillus crispatus strain FDAARGOS_743]	1986082	1989861	10785	3780	100	392.871	38.9	43.9
15	NZ_CP046311.1 [Lactobacillus crispatus strain FDAARGOS_743]	1986082	1989861	2304	3780	100	81.7008	39.1	43.6
16	NZ_CP046311.1 [Lactobacillus crispatus strain FDAARGOS_743]	1986082	1989861	2	142	3.75661	0.0751323	36.7	44
17	NZ_CP046311.1 [Lactobacillus crispatus strain FDAARGOS_743]	1986082	1989861	0	0	0	0	0	0
Footnotes:
* Pullulanase type I (pulA) gene from the closed L. crispatus chromosome NZ_CP046311.1, start position 1986082 and end position 1989861; this gene is 100% identical to the L. crispatusRL03 pulA gene used in BLASTn analyses

## Sheet: Table S9
Table S9. Lactobacillus crispatus genome coverage in Kenyan Girls Health Study metagenomes
Participant ID	Target Name (Genome Reference)	Start Position	End Position	Number Reads Aligned	Number of Covered Bases	Proportion of Covered Bases	Mean Depth of Coverage	Mean baseQ in Covered Region	Mean mapQ of Selected Rreads
1	NZ_CP046311.1 [Lactobacillus crispatus strain FDAARGOS_743]	1	2373487	1159321	2133368	89.8833	66.2924	39.1	34.6
2	NZ_CP046311.1 [Lactobacillus crispatus strain FDAARGOS_743]	1	2373487	2665158	2285448	96.2907	150.66	39.1	36.7
3	NZ_CP046311.1 [Lactobacillus crispatus strain FDAARGOS_743]	1	2373487	3415	214526	9.03843	0.171489	38.2	25.8
4	NZ_CP046311.1 [Lactobacillus crispatus strain FDAARGOS_743]	1	2373487	500700	2237424	94.2674	27.995	39.2	36.5
5	NZ_CP046311.1 [Lactobacillus crispatus strain FDAARGOS_743]	1	2373487	289349	345804	14.5694	14.2075	38.7	11.1
6	NZ_CP046311.1 [Lactobacillus crispatus strain FDAARGOS_743]	1	2373487	780390	1802257	75.9329	45.841	38.6	40.9
7	NZ_CP046311.1 [Lactobacillus crispatus strain FDAARGOS_743]	1	2373487	2238331	2077145	87.5145	127.954	39.2	36.2
8	NZ_CP046311.1 [Lactobacillus crispatus strain FDAARGOS_743]	1	2373487	6399792	2301639	96.9729	363.356	39.2	37.1
9	NZ_CP046311.1 [Lactobacillus crispatus strain FDAARGOS_743]	1	2373487	79577	496131	20.903	3.81156	39.4	17.2
10	NZ_CP046311.1 [Lactobacillus crispatus strain FDAARGOS_743]	1	2373487	5898778	2064055	86.963	334.073	39.3	35.3
11	NZ_CP046311.1 [Lactobacillus crispatus strain FDAARGOS_743]	1	2373487	10339571	2158516	90.9428	589.612	39.2	36
12	NZ_CP046311.1 [Lactobacillus crispatus strain FDAARGOS_743]	1	2373487	672295	1770929	74.613	39.0661	39	40.5
13	NZ_CP046311.1 [Lactobacillus crispatus strain FDAARGOS_743]	1	2373487	5091524	2137277	90.048	290.48	39.3	36.6
14	NZ_CP046311.1 [Lactobacillus crispatus strain FDAARGOS_743]	1	2373487	7224531	2246909	94.667	428.283	38.8	36.7
15	NZ_CP046311.1 [Lactobacillus crispatus strain FDAARGOS_743]	1	2373487	5571637	2272856	95.7602	325.636	39	35
16	NZ_CP046311.1 [Lactobacillus crispatus strain FDAARGOS_743]	1	2373487	21871	707840	29.8228	1.11921	38.9	23.1
17	NZ_CP046311.1 [Lactobacillus crispatus strain FDAARGOS_743]	1	2373487	98413	529082	22.2913	4.74335	39.1	11.4
Footnotes:
* The closed L. crispatus chromosome NZ_CP046311.1 was used as the mapping reference; this genome also encoded one plasmid, which was not included in this analysis

## Sheet: Table S10
Table S10. Pasolli† metagenome BLASTn results
Metagenome ID	Study Name	Sample ID	Query Name (pulA Gene)*	Subject Name (Contig Sequence)	Query Start	Query End	Subject Start	Subject End	Alignment Length	Expected Value	Percent Identity	Query Coverage
FerrettiP_2018__CA_C10024MS2405VA_t0M15	FerrettiP_2018	CA_C10024MS2405VA_t0M15	RL03 LVM Lactobacillus crispatus (GCF_004361385) [type I pullulanase]	NODE_123_length_5376_cov_15.8305	1	3780	5234	1455	3780	0	99.63	100
FerrettiP_2018__CA_C10032MS2545VA_t0M15	FerrettiP_2018	CA_C10032MS2545VA_t0M15	RL03 LVM Lactobacillus crispatus (GCF_004361385) [type I pullulanase]	NODE_129_length_5222_cov_29.1552	1	3780	269	4048	3780	0	99.974	100
FerrettiP_2018__CA_C10034MS2581VA_t0M16	FerrettiP_2018	CA_C10034MS2581VA_t0M16	RL03 LVM Lactobacillus crispatus (GCF_004361385) [type I pullulanase]	NODE_165_length_3923_cov_6.53335	1	3780	139	3918	3780	0	99.974	100
FerrettiP_2018__CA_C10035MS2599VA_t0M15	FerrettiP_2018	CA_C10035MS2599VA_t0M15	RL03 LVM Lactobacillus crispatus (GCF_004361385) [type I pullulanase]	NODE_143_length_5328_cov_8.90594	1	3780	228	4007	3780	0	100	100
FerrettiP_2018__CA_C10043MS2743VA_t0M15	FerrettiP_2018	CA_C10043MS2743VA_t0M15	RL03 LVM Lactobacillus crispatus (GCF_004361385) [type I pullulanase]	NODE_123_length_5280_cov_87.1403	1	3780	228	4007	3780	0	99.947	100
HMP_2012__SRS014465	HMP_2012	SRS014465	RL03 LVM Lactobacillus crispatus (GCF_004361385) [type I pullulanase]	NODE_130_length_4403_cov_5.4333	1	3780	269	4048	3780	0	100	100
HMP_2012__SRS014466	HMP_2012	SRS014466	RL03 LVM Lactobacillus crispatus (GCF_004361385) [type I pullulanase]	NODE_111_length_5346_cov_10.3498	1	3780	5194	1415	3780	0	100	100
HMP_2012__SRS014494	HMP_2012	SRS014494	RL03 LVM Lactobacillus crispatus (GCF_004361385) [type I pullulanase]	NODE_142_length_5215_cov_9.49709	1	3780	4891	1112	3780	0	100	100
HMP_2012__SRS015072	HMP_2012	SRS015072	RL03 LVM Lactobacillus crispatus (GCF_004361385) [type I pullulanase]	NODE_172_length_5462_cov_10.8056	1	3780	269	4048	3780	0	100	100
HMP_2012__SRS016516	HMP_2012	SRS016516	RL03 LVM Lactobacillus crispatus (GCF_004361385) [type I pullulanase]	NODE_94_length_5457_cov_7.44298	1	1024	302	1304	1024	0	97.656	99#
HMP_2012__SRS016516	HMP_2012	SRS016516	RL03 LVM Lactobacillus crispatus (GCF_004361385) [type I pullulanase]	NODE_94_length_5457_cov_7.44298	1061	3780	1269	3985	2720	0	99.338	99#
HMP_2012__SRS017520	HMP_2012	SRS017520	RL03 LVM Lactobacillus crispatus (GCF_004361385) [type I pullulanase]	NODE_134_length_5159_cov_14.5999	1	3780	269	4048	3780	0	99.735	100
HMP_2012__SRS018769	HMP_2012	SRS018769	RL03 LVM Lactobacillus crispatus (GCF_004361385) [type I pullulanase]	NODE_94_length_6286_cov_16.4755	1	3780	4889	1110	3780	0	99.735	100
HMP_2012__SRS019600	HMP_2012	SRS019600	RL03 LVM Lactobacillus crispatus (GCF_004361385) [type I pullulanase]	NODE_103_length_5300_cov_42.9945	1	3780	4889	1110	3780	0	100	100
HMP_2012__SRS021969	HMP_2012	SRS021969	RL03 LVM Lactobacillus crispatus (GCF_004361385) [type I pullulanase]	NODE_124_length_5159_cov_8.76391	1	3780	269	4048	3780	0	100	100
HMP_2012__SRS021969	HMP_2012	SRS021969	RL03 LVM Lactobacillus crispatus (GCF_004361385) [type I pullulanase]	NODE_2131_length_105_cov_2.78	20	74	55	1	55	1.27e-21	100	1
HMP_2012__SRS022158	HMP_2012	SRS022158	RL03 LVM Lactobacillus crispatus (GCF_004361385) [type I pullulanase]	NODE_116_length_5553_cov_11.7761	1	3780	5252	1473	3780	0	99.656	100
HMP_2012__SRS051505	HMP_2012	SRS051505	RL03 LVM Lactobacillus crispatus (GCF_004361385) [type I pullulanase]	NODE_184_length_5626_cov_10.8896	1	3780	393	4172	3780	0	99.894	100
HMP_2012__SRS065347	HMP_2012	SRS065347	RL03 LVM Lactobacillus crispatus (GCF_004361385) [type I pullulanase]	NODE_173_length_5392_cov_138.851	1	3780	426	4200	3780	0	99.868	100
Footnotes:
† Selected from metagenomes analyzed by Pasolli et al., Cell, 2019
* Fully functional pullulanase type I (pulA) gene from the RL03 Lactobacillus crispatus genome (GCF_004361385, van der Veer et al., Microbiome, 2019)
# Calculated across multiple HSPs

[truncated: 3 more sheets: Table S11, Table S12, Table S13]
